# Supplementary material for: Rational design and synthesis of novel 2-(substituted-2H-chromen-3-yl)-5-aryl-1H-imidazole derivatives as an anti-angiogenesis and anti-cancer agent
Source: Royal Society of Chemistry journal article supplement (doi:10.1039/c4ra09945a), 2014-01-01
Supplement: c4ra09945a1.pdf [file c4ra09945a1.pdf]

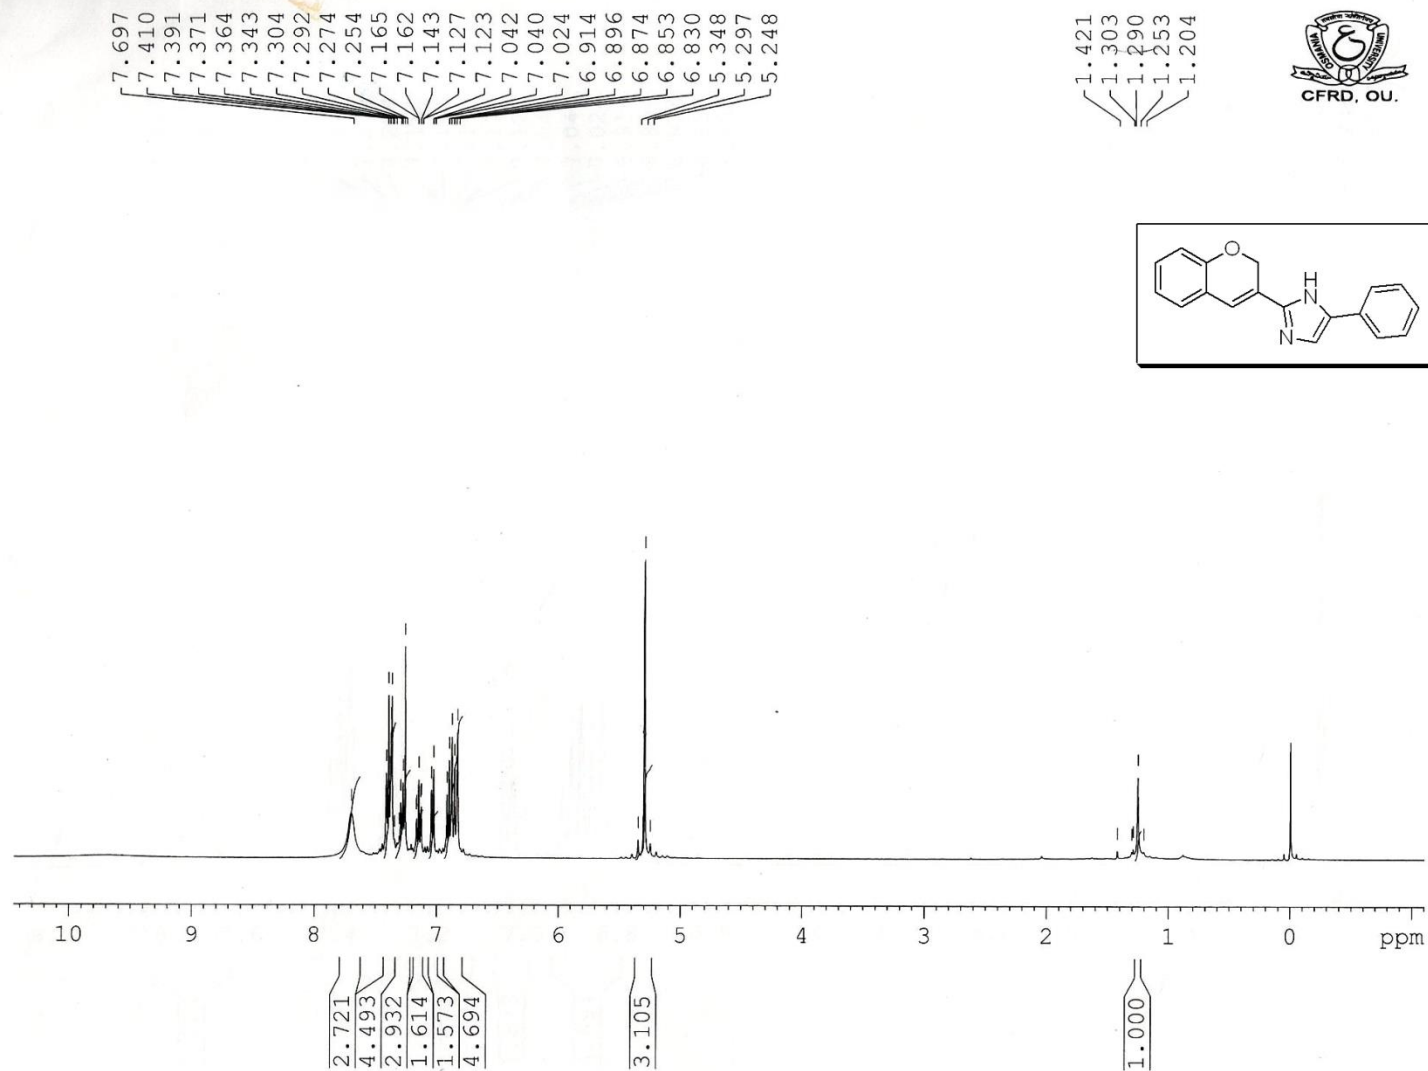

153.223  
143.236  
141.002  
134.308  
129.160  
128.424  
127.040  
122.374  
121.760  
118.610  
115.475

64.713

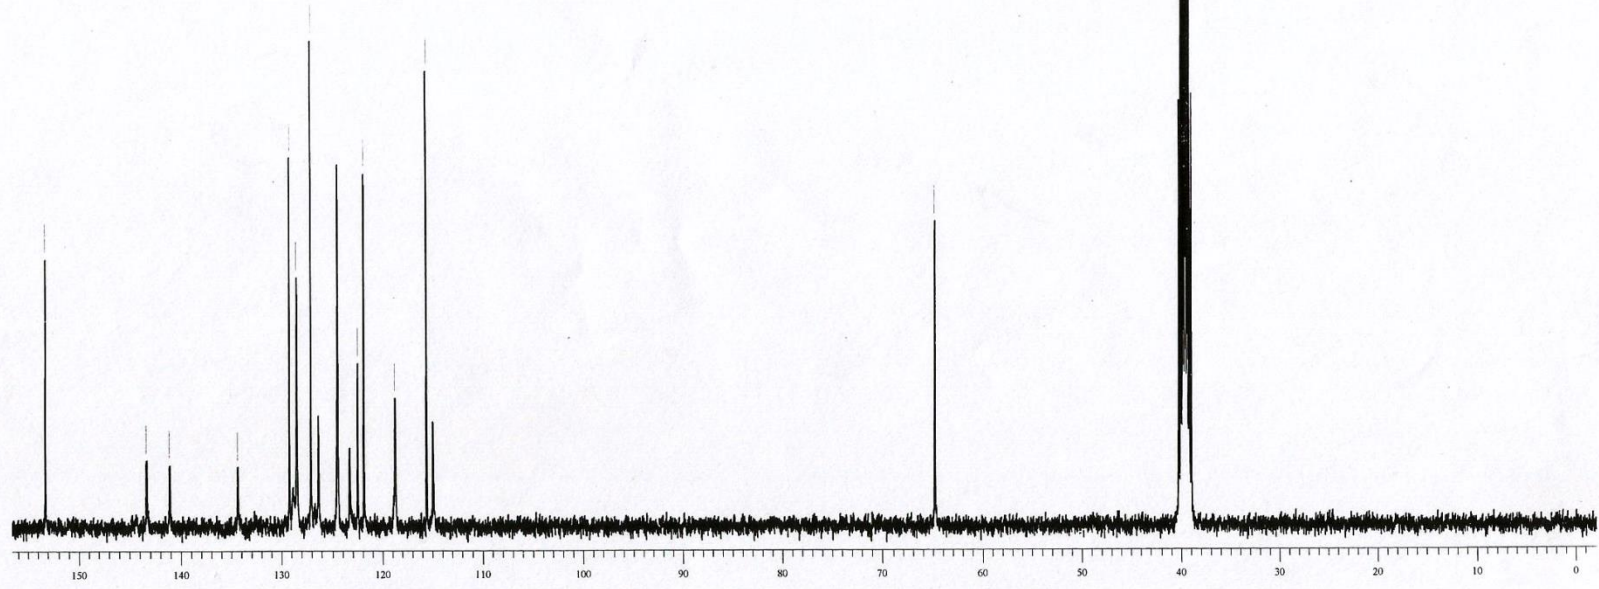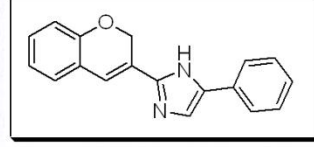

ACC/ZT/056/50/I

OSPL060112022 8 (0.161)

2: Scan ES-  
2.37e6

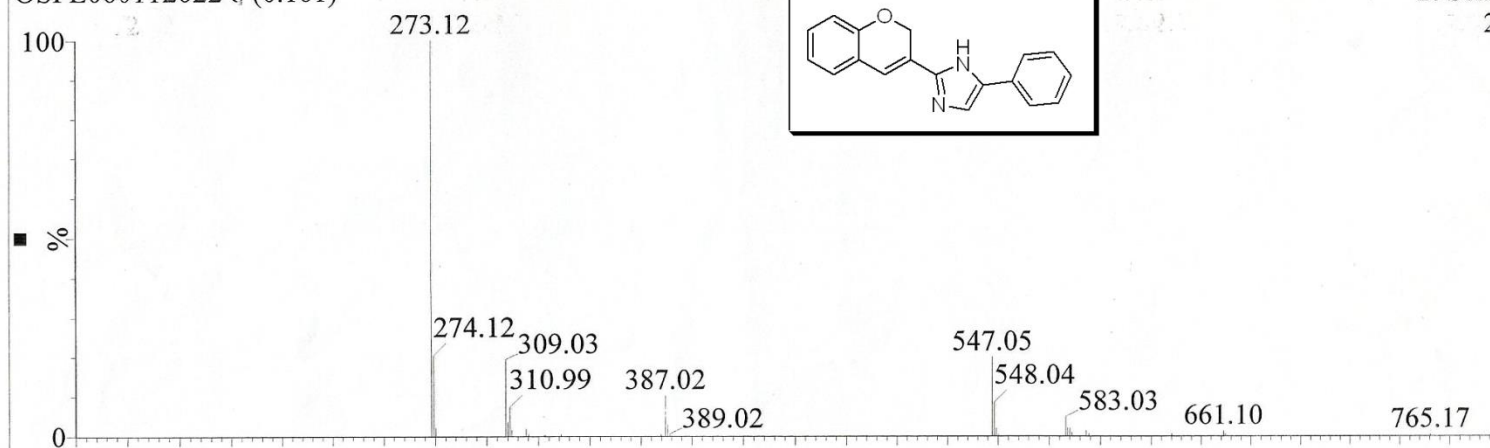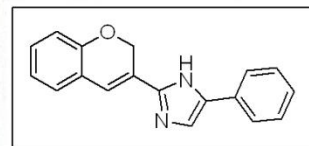

OSPL060112022 11 (0.212)

1: Scan ES+  
6.54e7

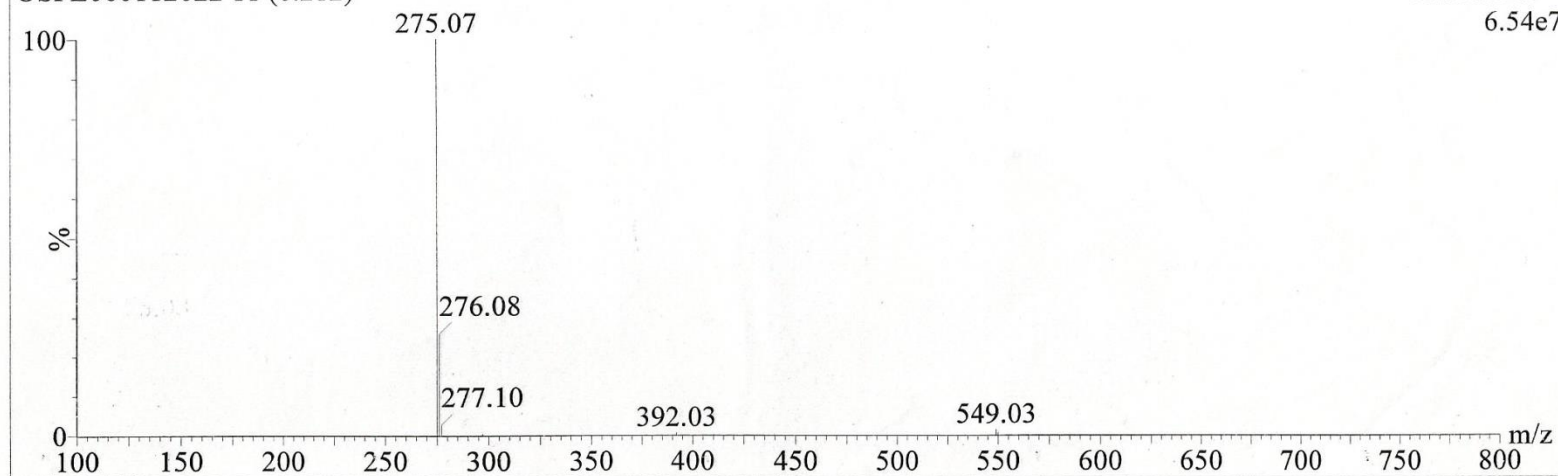

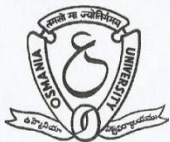

CENTRAL FACILITIES - OSMANIA UNIVERSITY

FTIR ANALYSIS REPORT

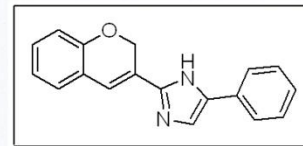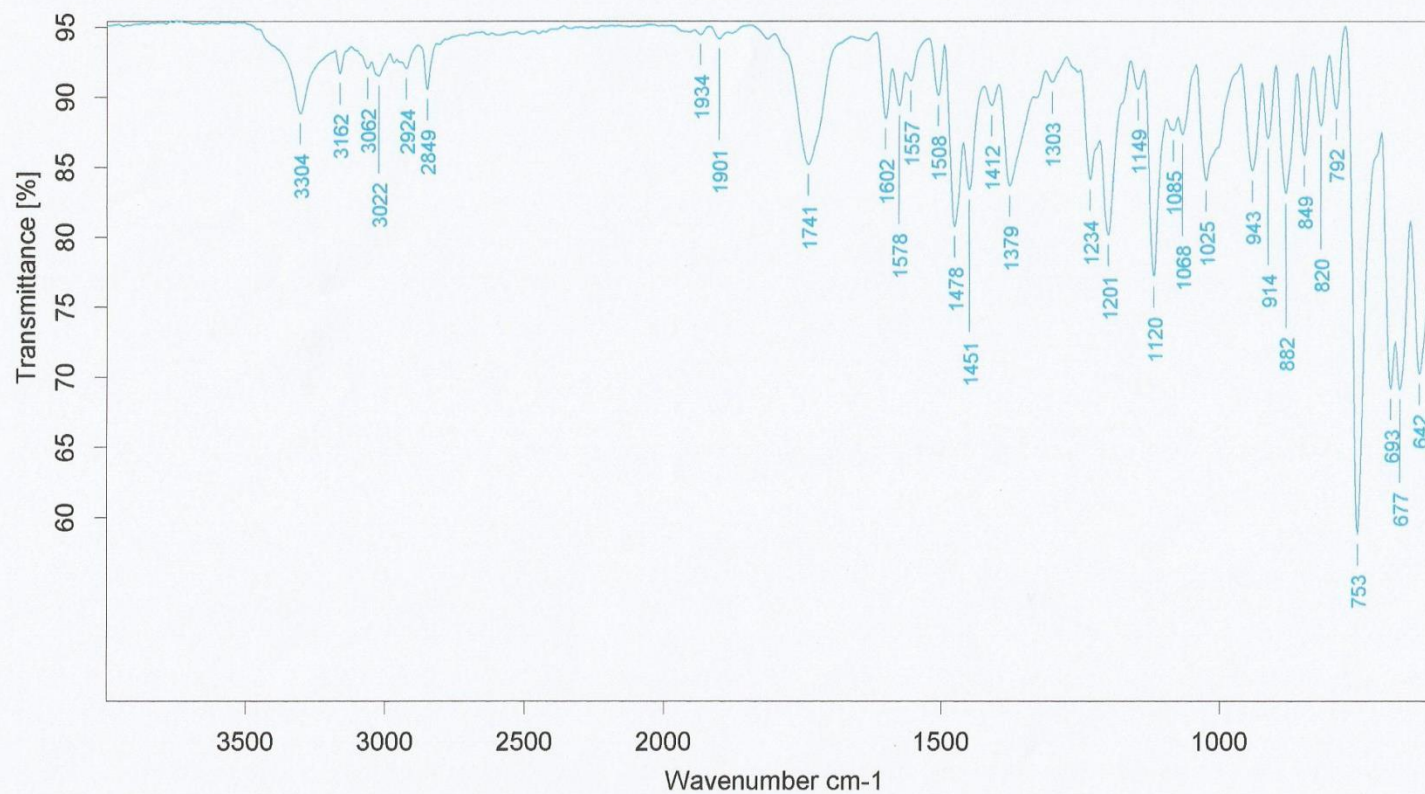

Sample Name: 1302-1052 17 CR- 9 Sample Form:ATR 27/02/2013 11:12:04 AM



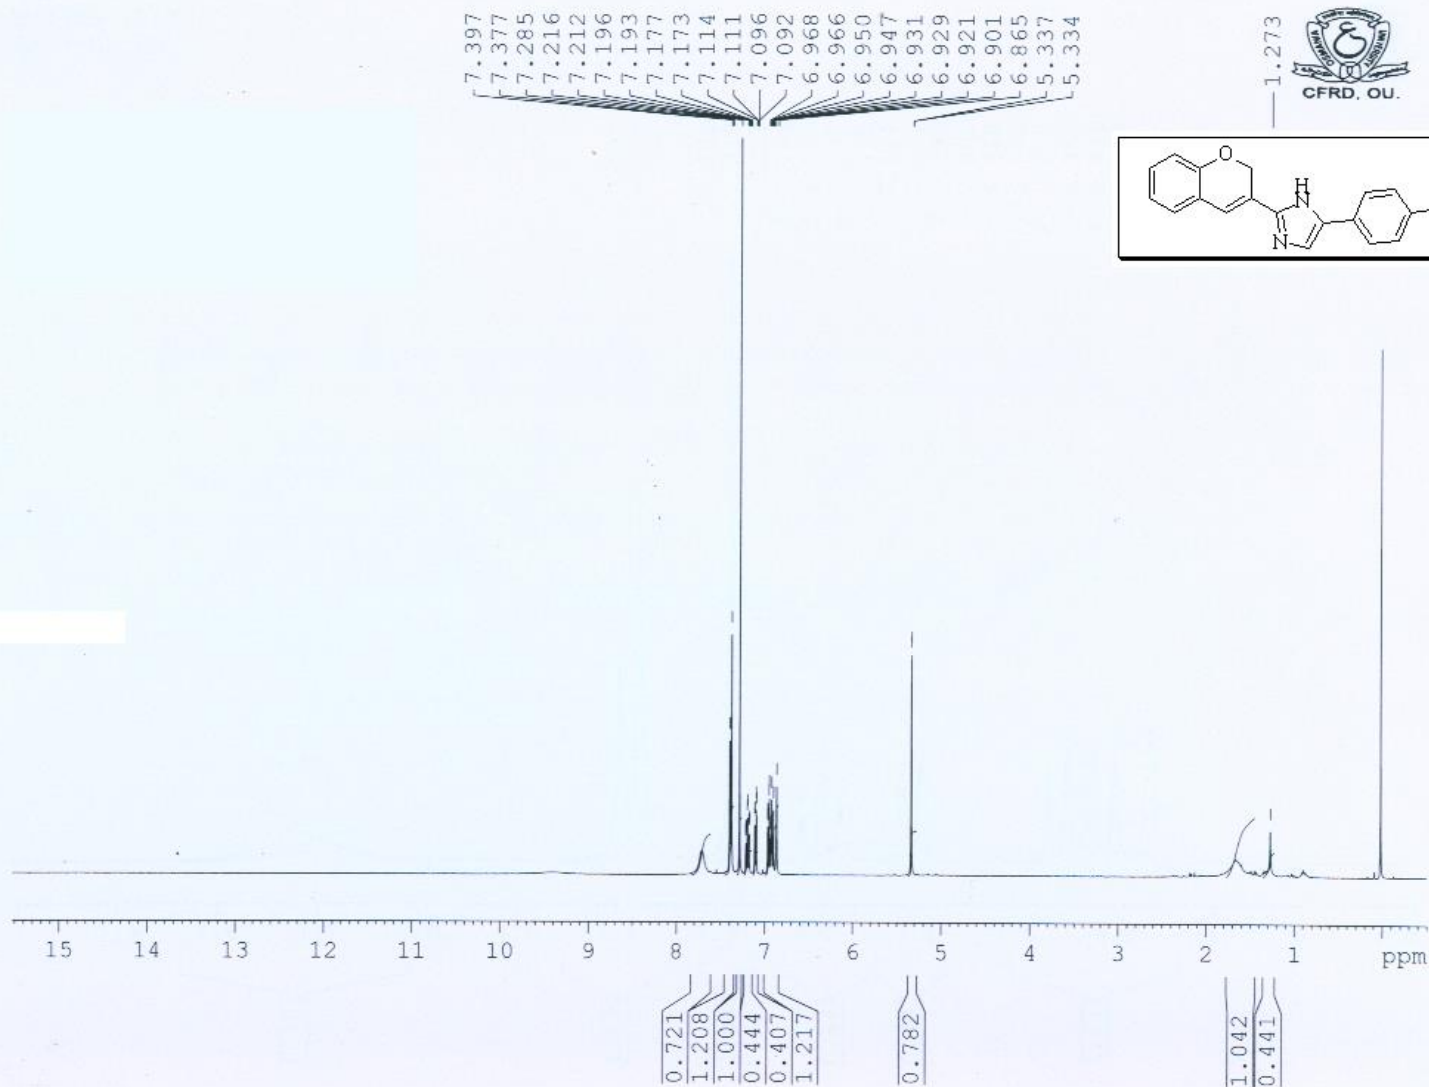

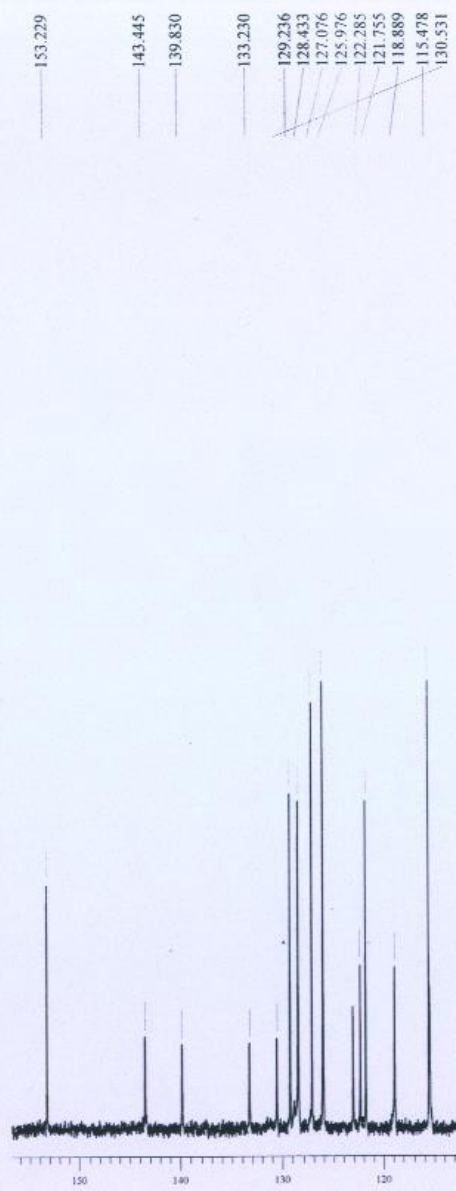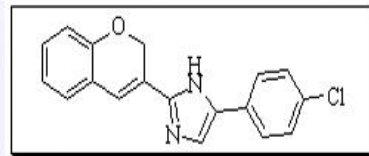

ACC/ZT/056/S1/II  
OSPL060112021 10 (0.202)

2: Scan ES-  
1.74e6

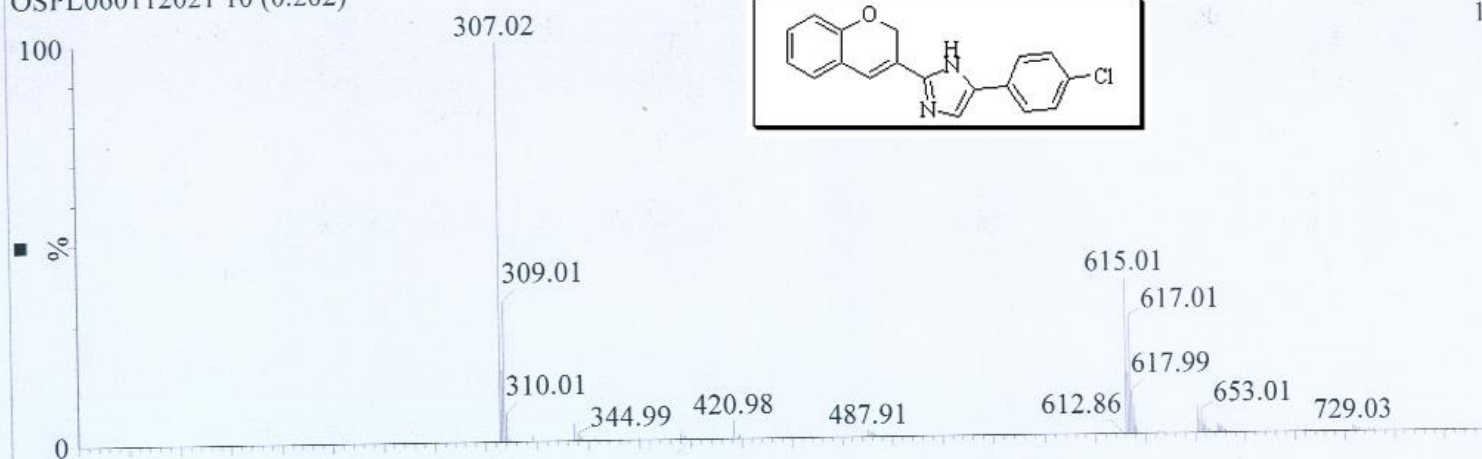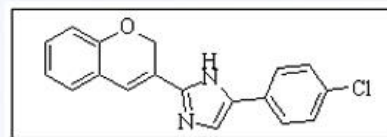

OSPL060112021 8 (0.151)

1: Scan ES+  
5.84e7

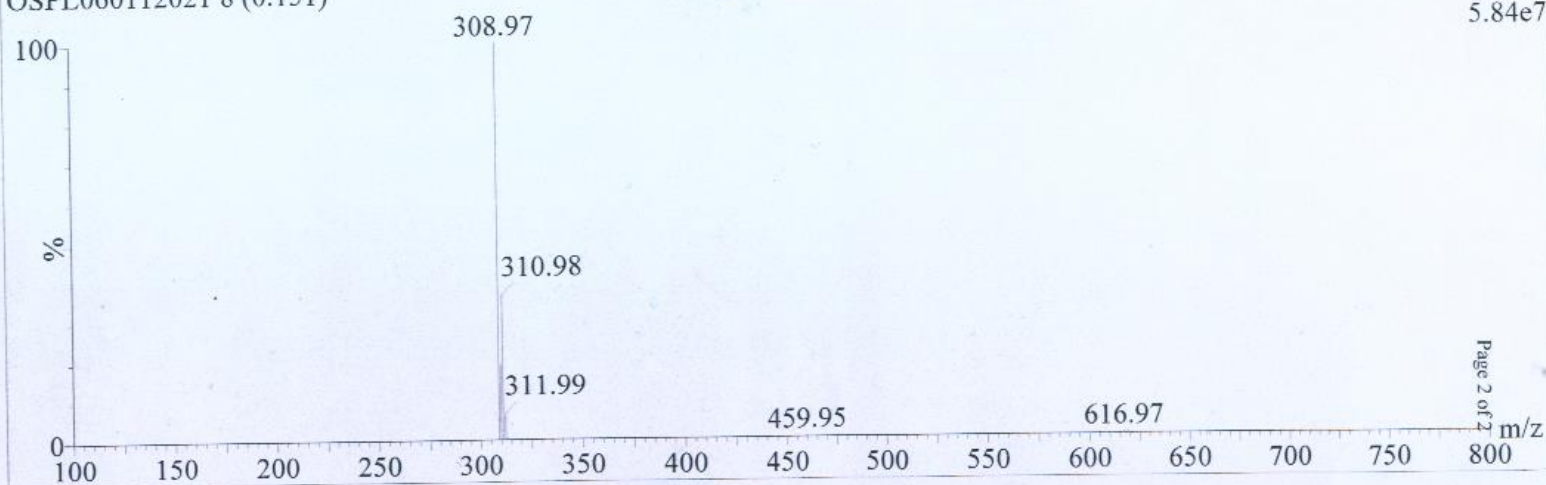

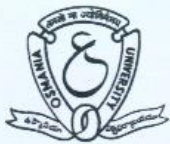

CENTRAL FACILITIES - OSMANIA UNIVERSITY

FTIR ANALYSIS REPORT

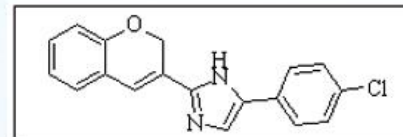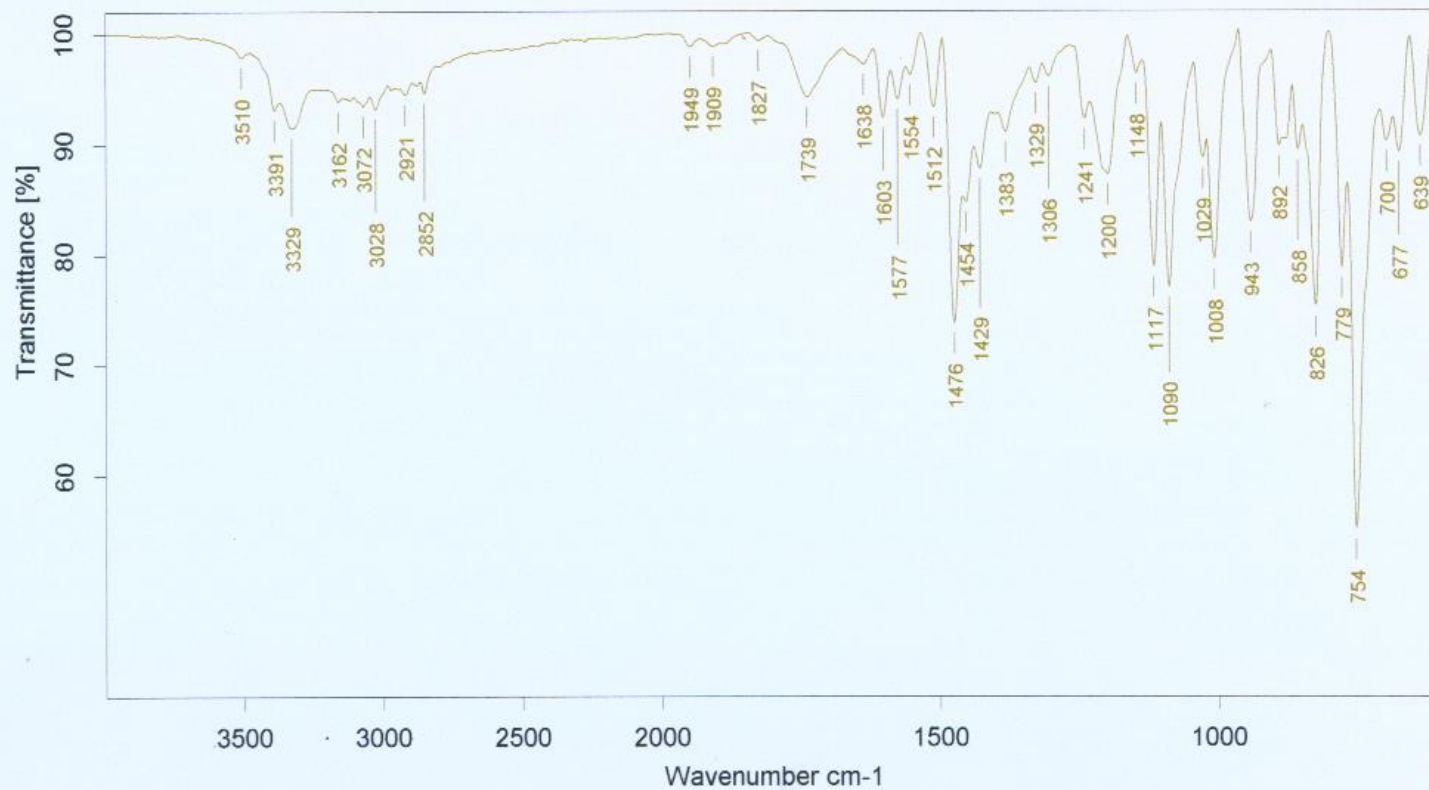

Sample Name: 1302-1052 18 CR- 10 Sample Form:ATR 27/02/2013 11:26:49 AM



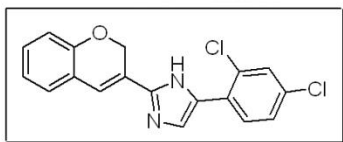

7.472  
7.382  
7.361  
7.335  
7.285  
7.221  
7.202  
7.183  
7.135  
7.113  
6.977  
6.956  
6.928  
6.905  
6.882  
5.342

2.064  
1.695  
1.639  
1.623  
1.593  
1.535  
1.490  
1.457  
1.411  
1.351  
1.271  
0.900

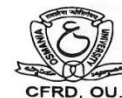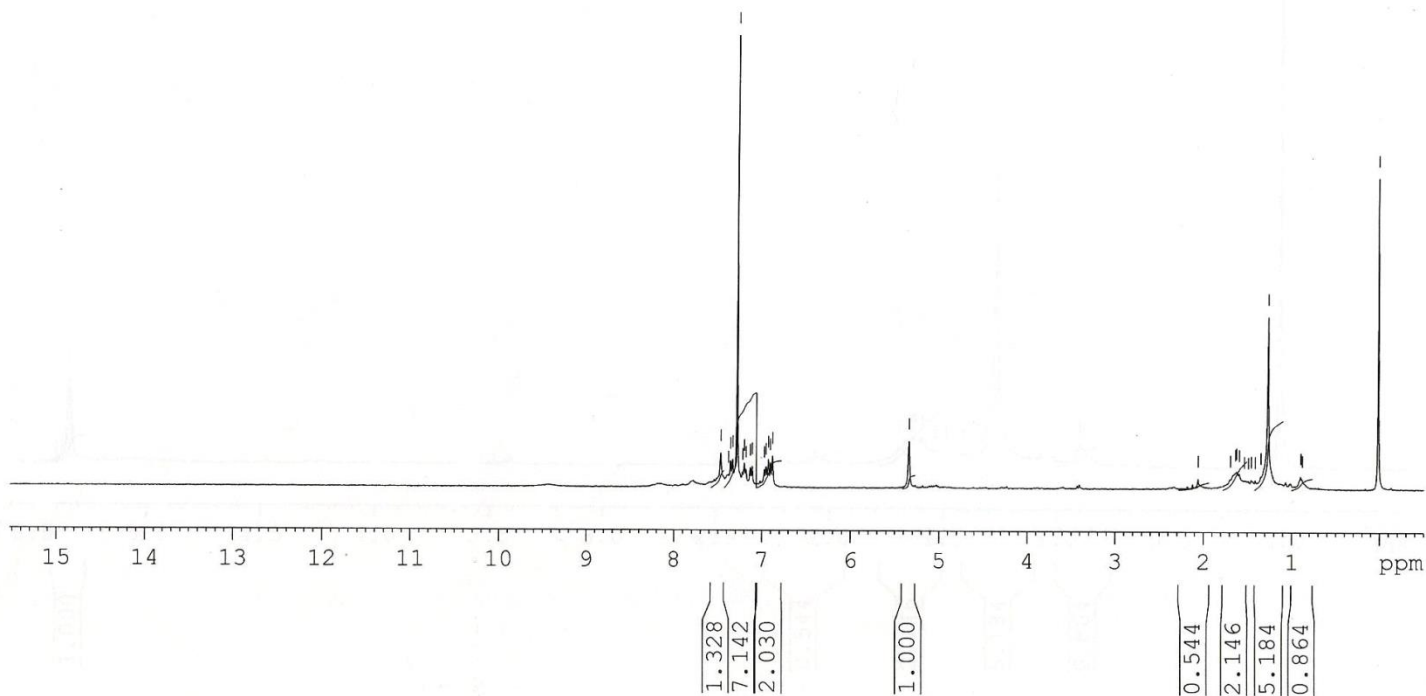

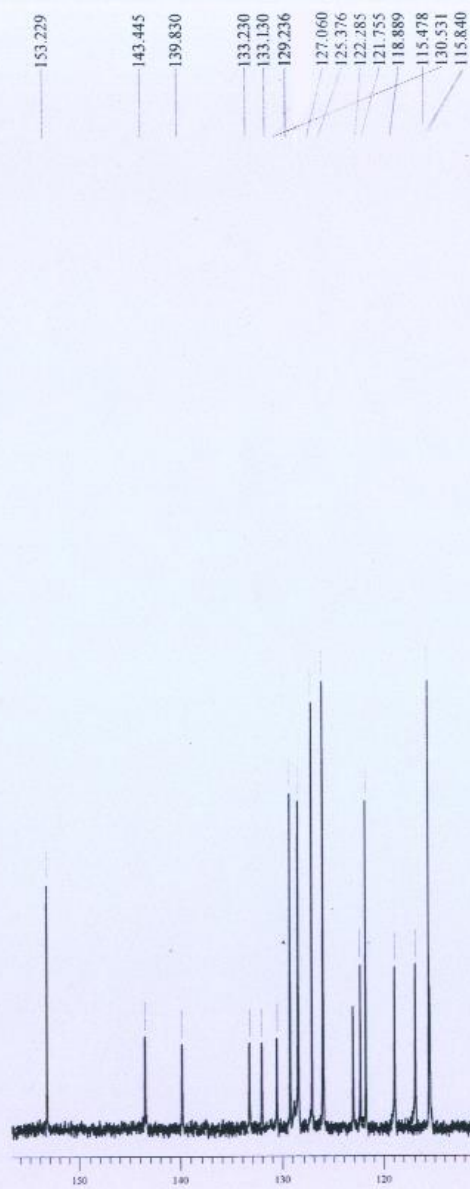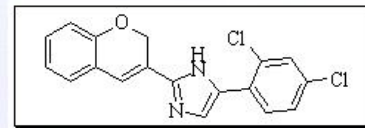

ACC/ZT/056/S2/III  
OSPL060112020 7 (0.141)

2: Scan ES-  
4.29e5

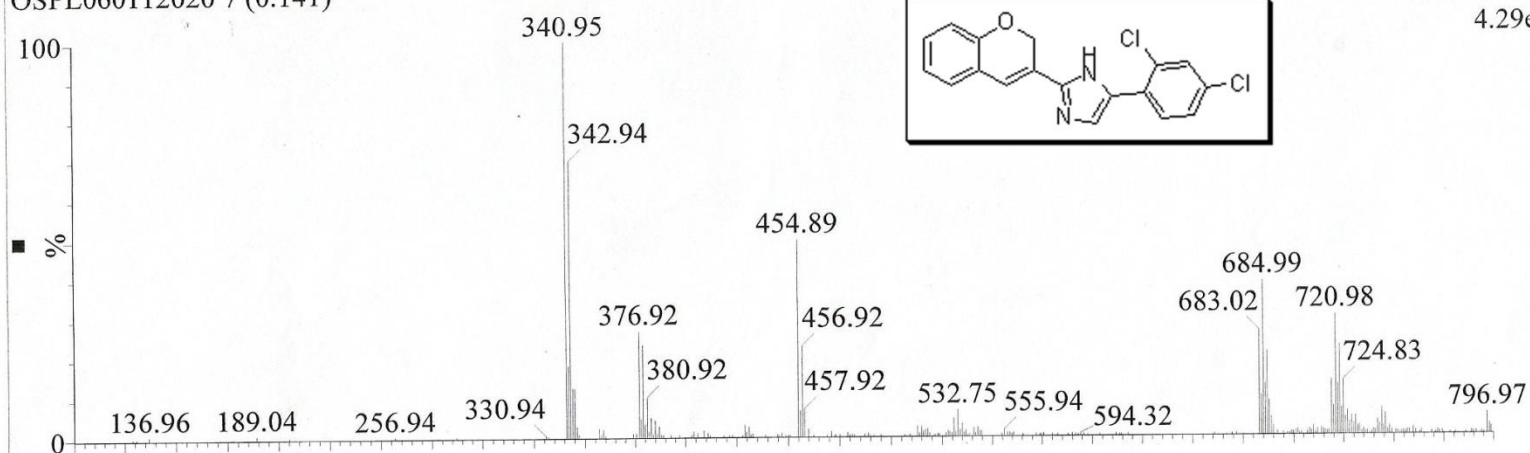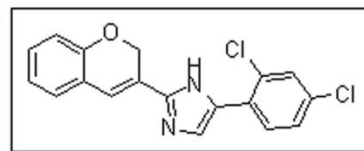

OSPL060112020 15 (0.293)

1: Scan ES+  
3.14e7

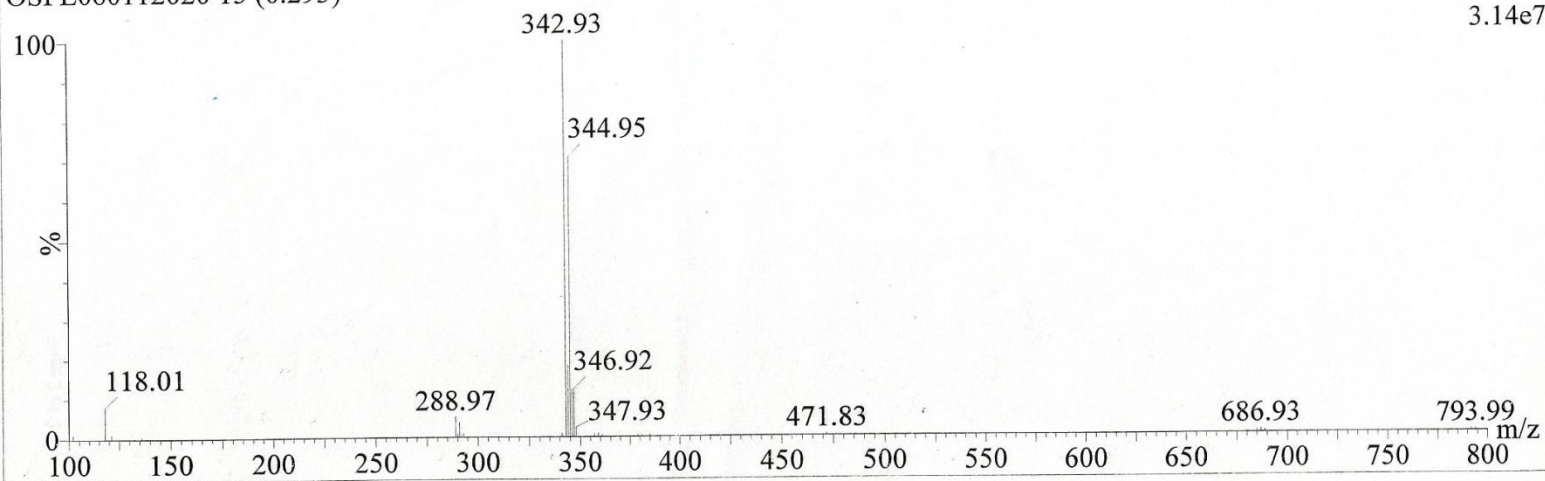

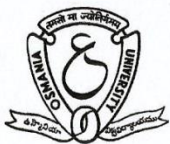

# CENTRAL FACILITIES - OSMANIA UNIVERSITY

## FTIR ANALYSIS REPORT

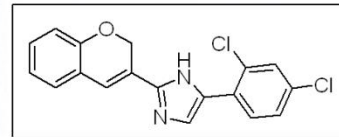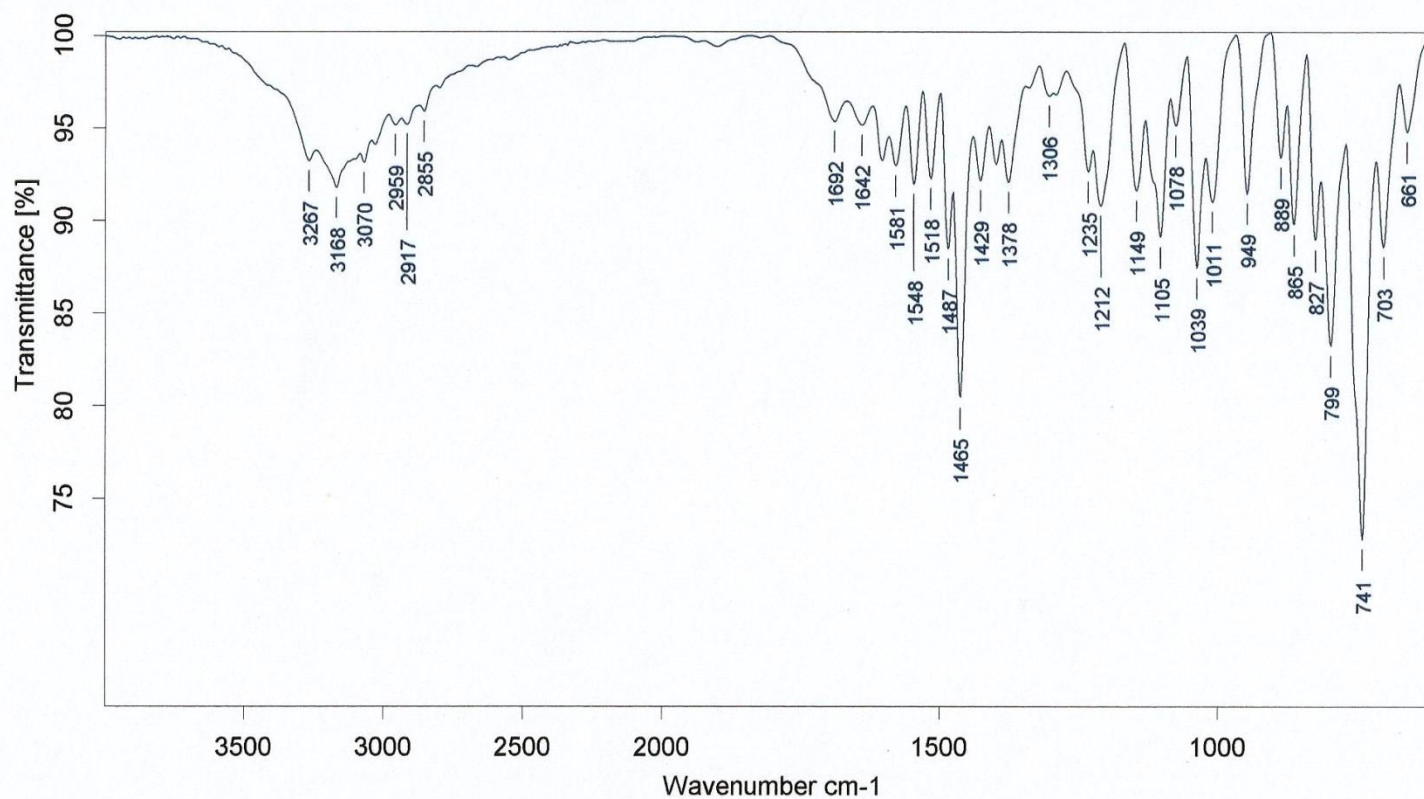

Sample Name: 1302-1052 21 CR- 13 Sample Form:ATR 27/02/2013 2:01:58 PM





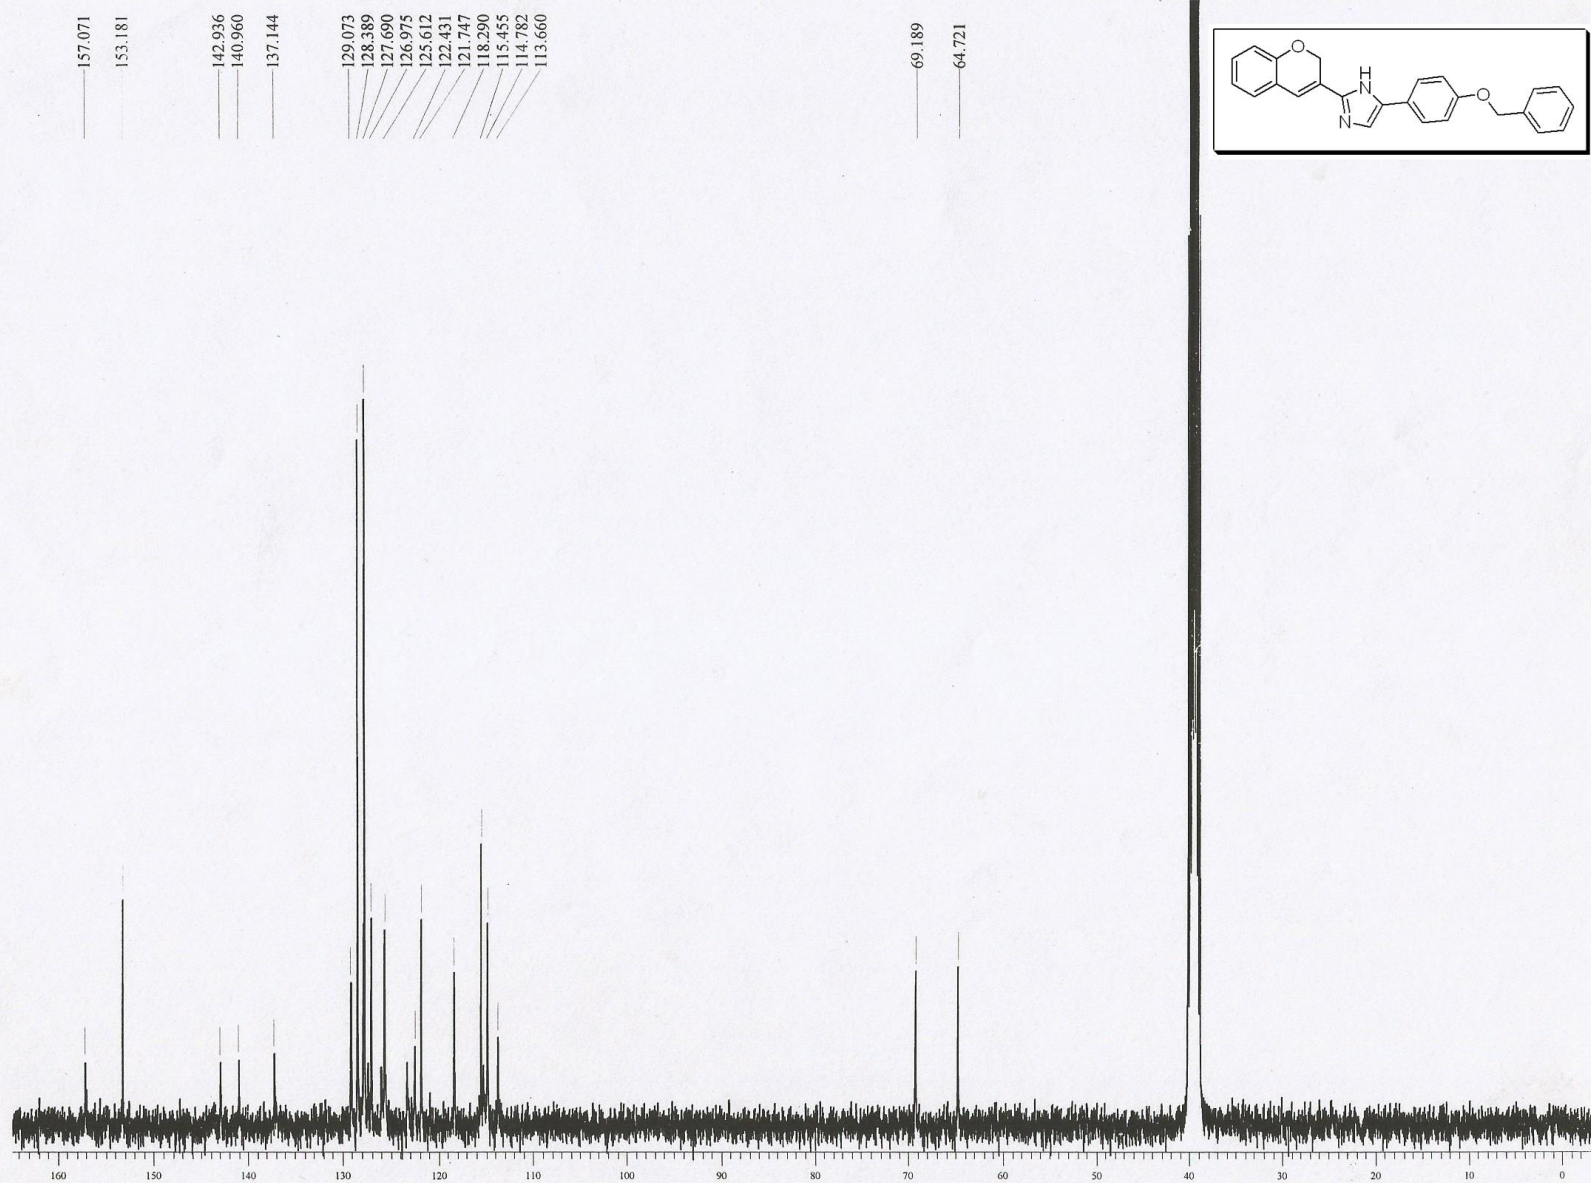

ACC/ZT/056/53/VI

OSPL070112011 12 (0.242)

2: Scan ES-  
9.13e5

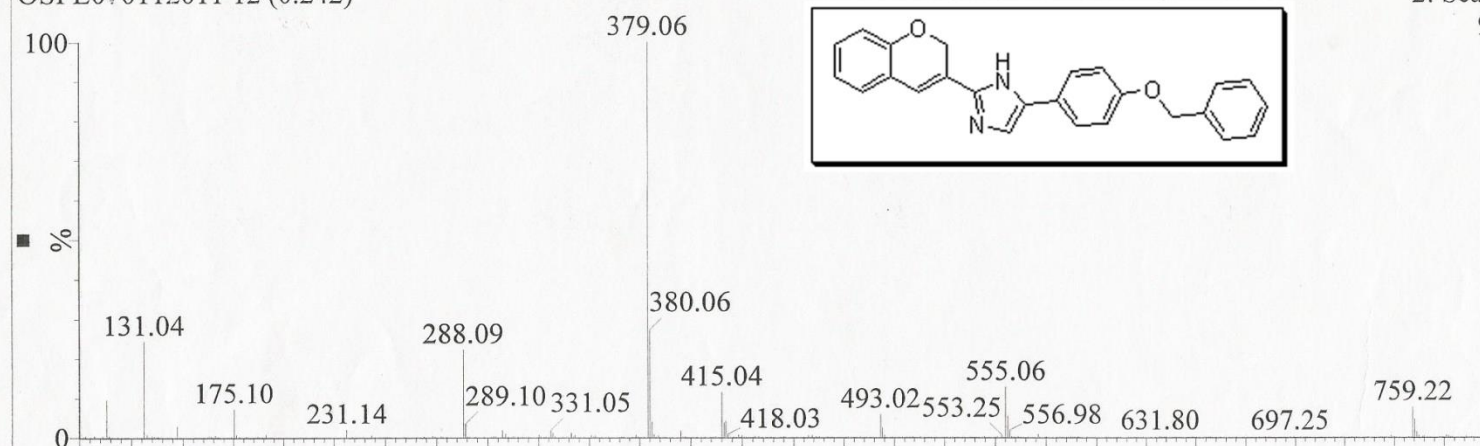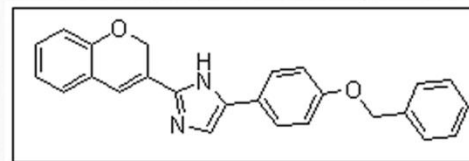

OSPL070112011 18 (0.353)

1: Scan ES+  
3.33e7

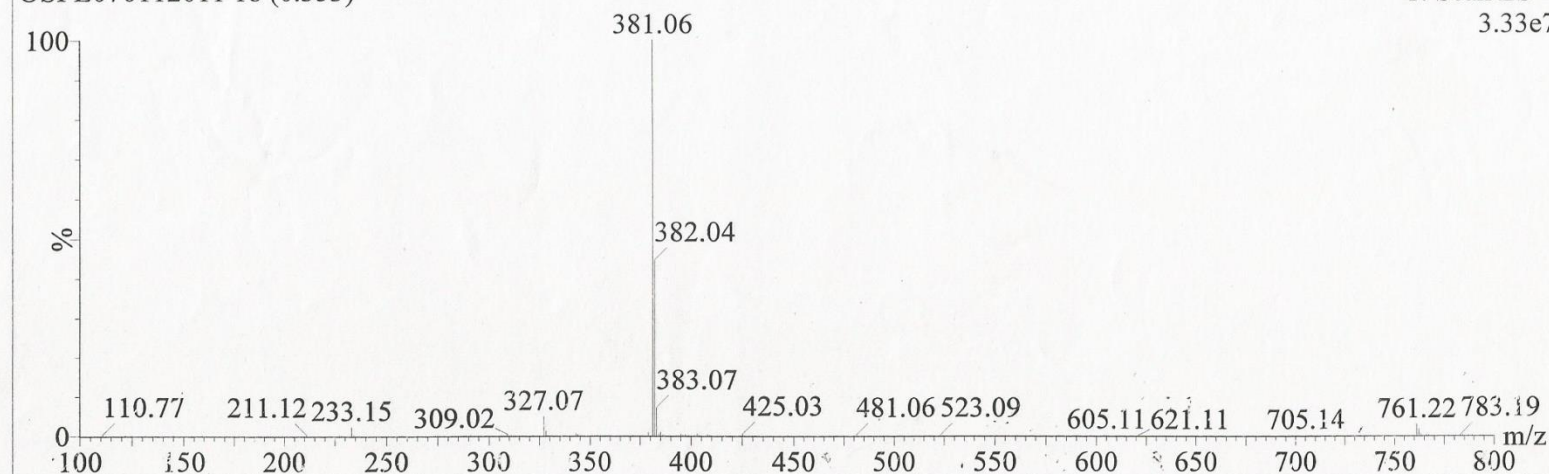

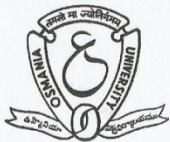

CENTRAL FACILITIES - OSMANIA UNIVERSITY

FTIR ANALYSIS REPORT

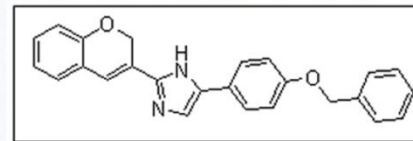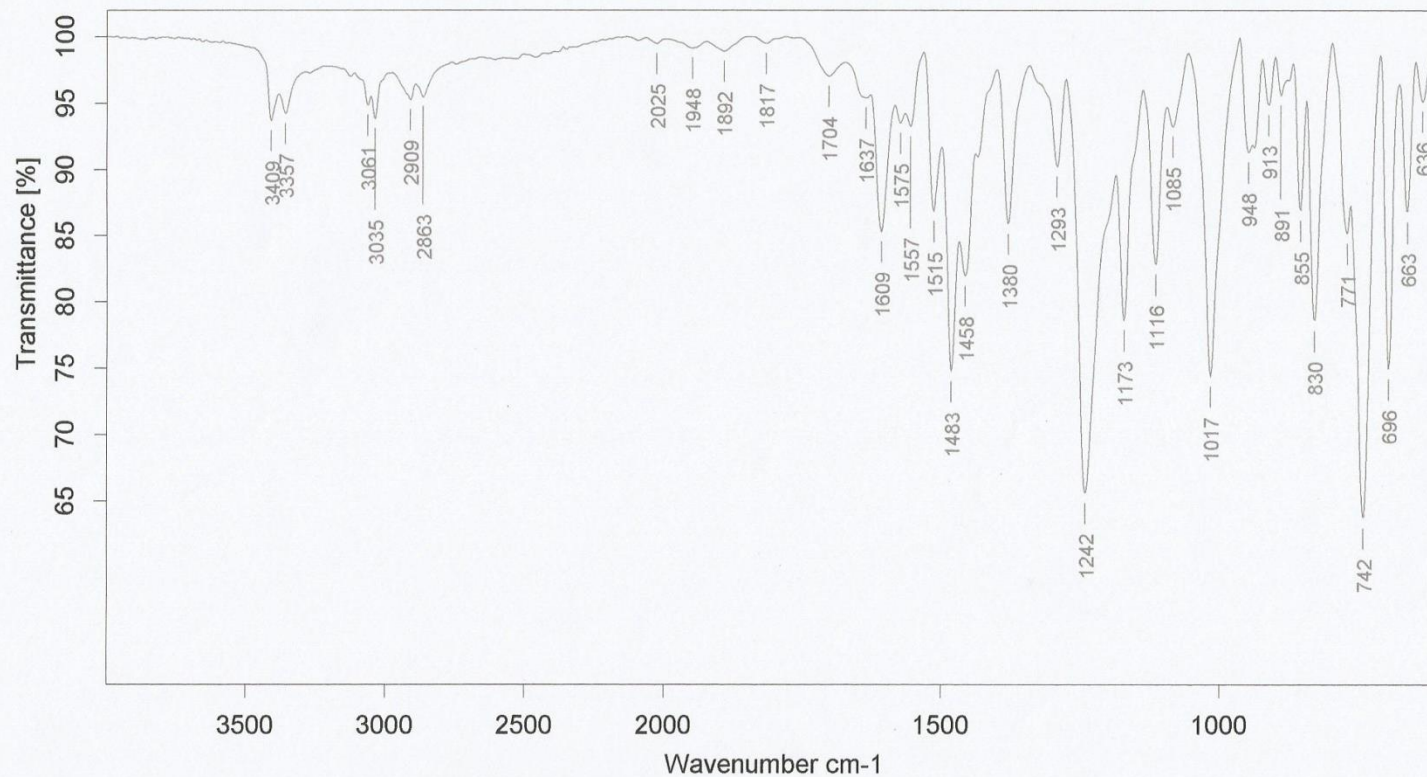

Sample Name: 1302-1052 20 CR- 12 Sample Form:ATR 27/02/2013 1:59:30 PM



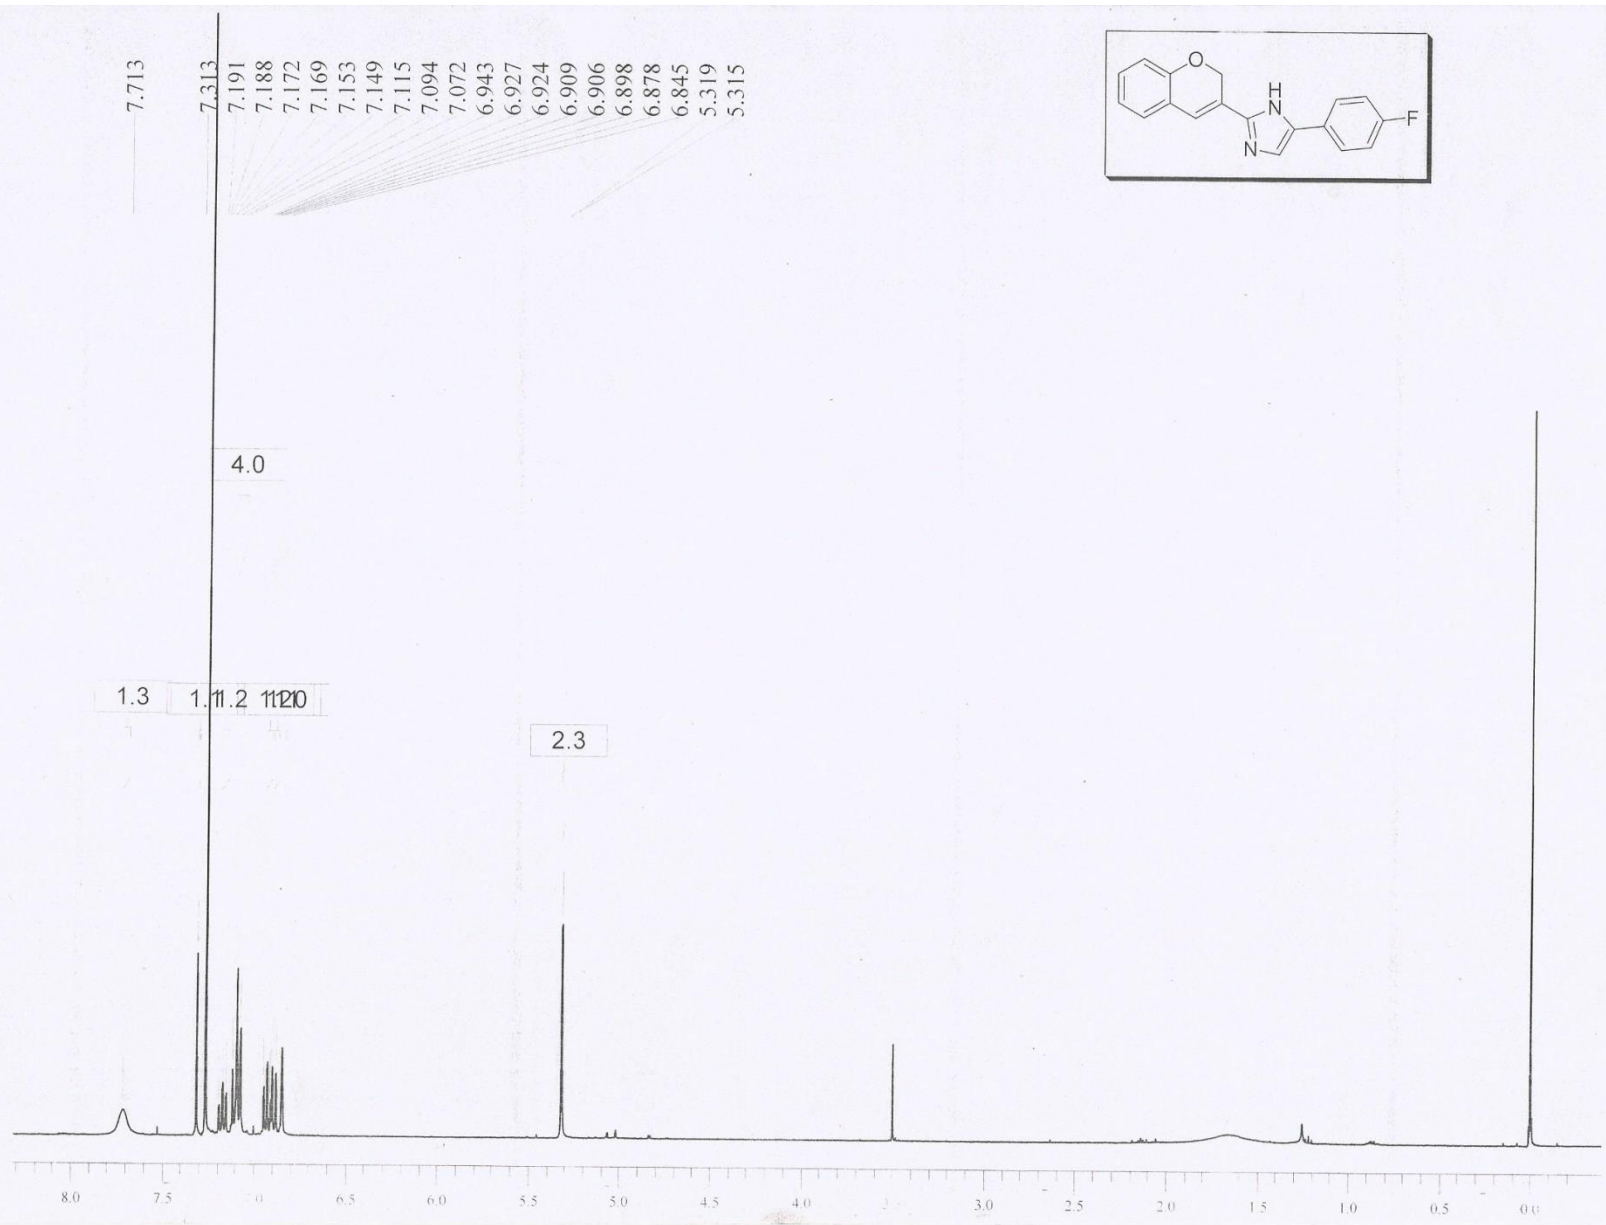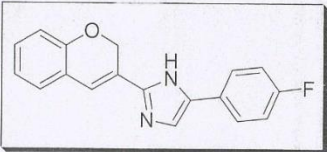

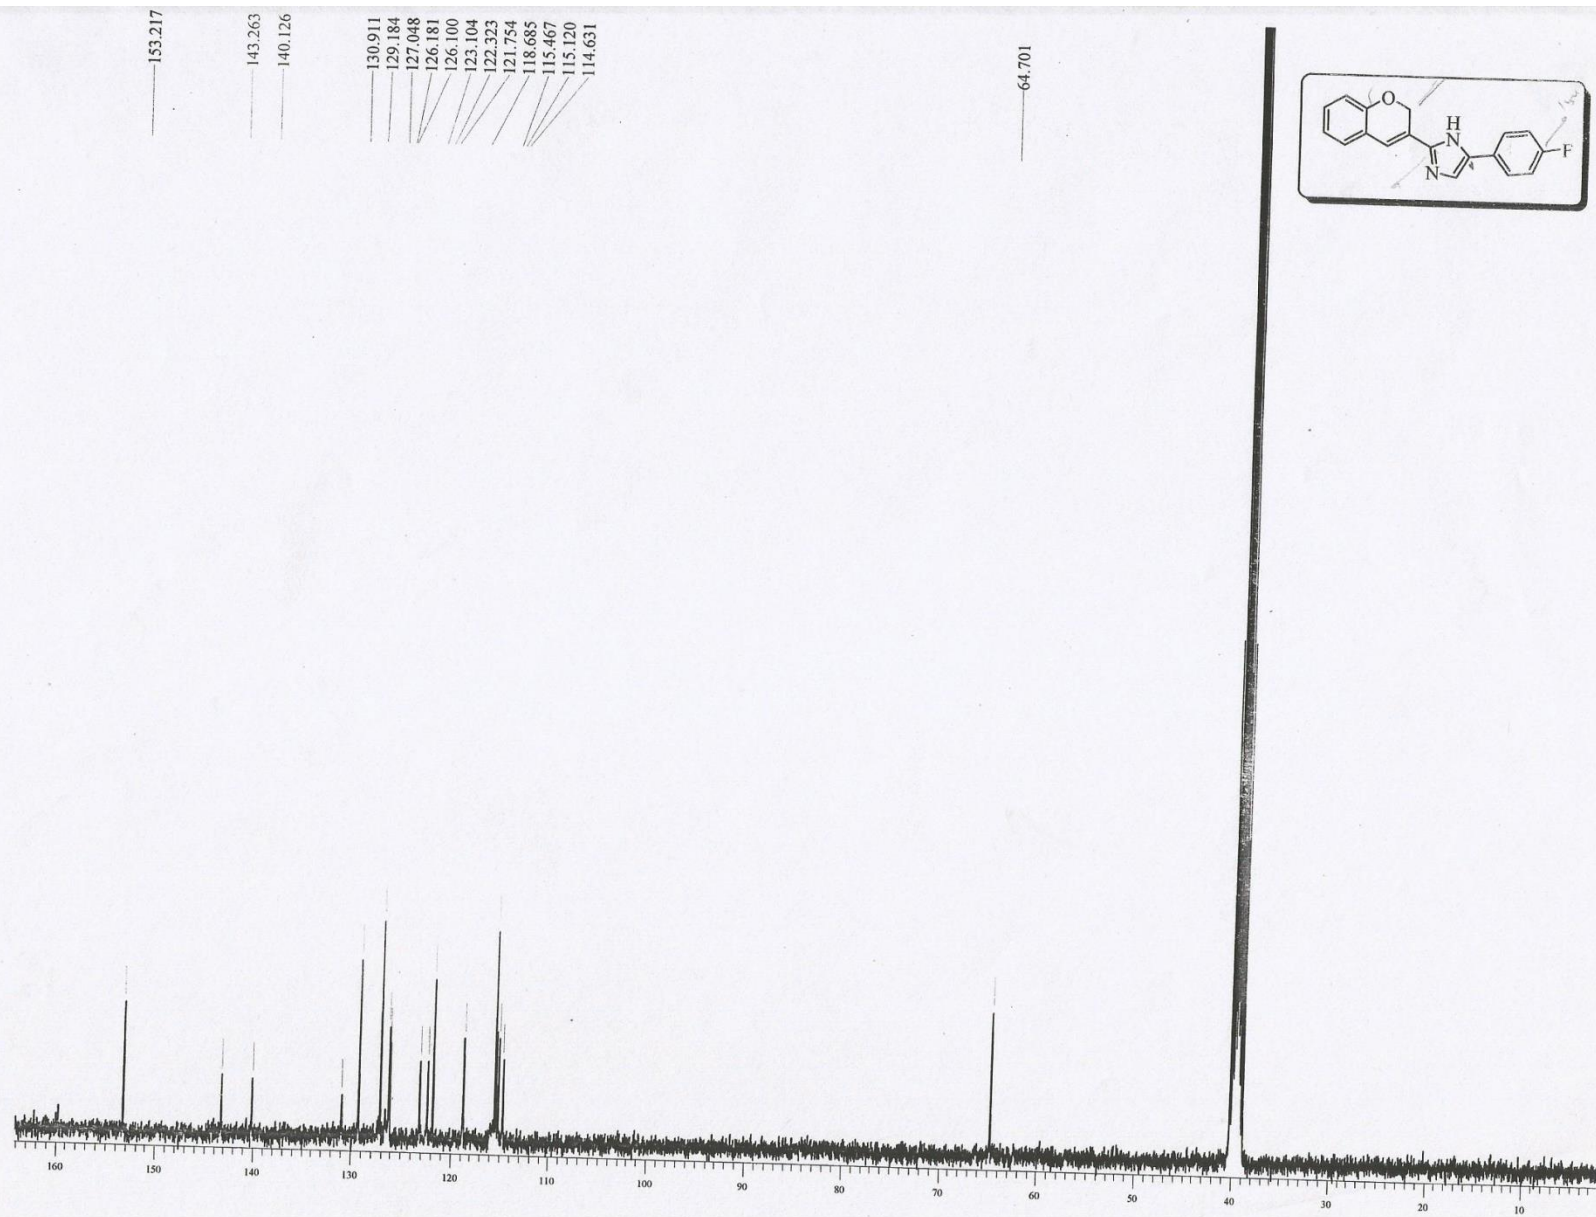

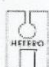

CRIM-F/292  
HETERO (R & D)  
ARD

AD/LC-MS/01

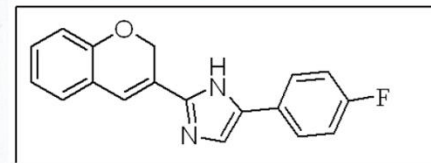

Sample Information

Sample Name : EB-6  
Date Acquired : 9/20/2013 10:51:46 AM  
Injection Volume : 10µl  
Data File : DM200913.lcd  
Method File : ESI METHOD POS.lcm  
Tuning File : E:\Labsolution\Project\Auto Tuning-ESI-080513.lct  
Operator Id : K.Jyothi

MS Spectrum Graph

Base Peak: 293.07/Polarity: Pos

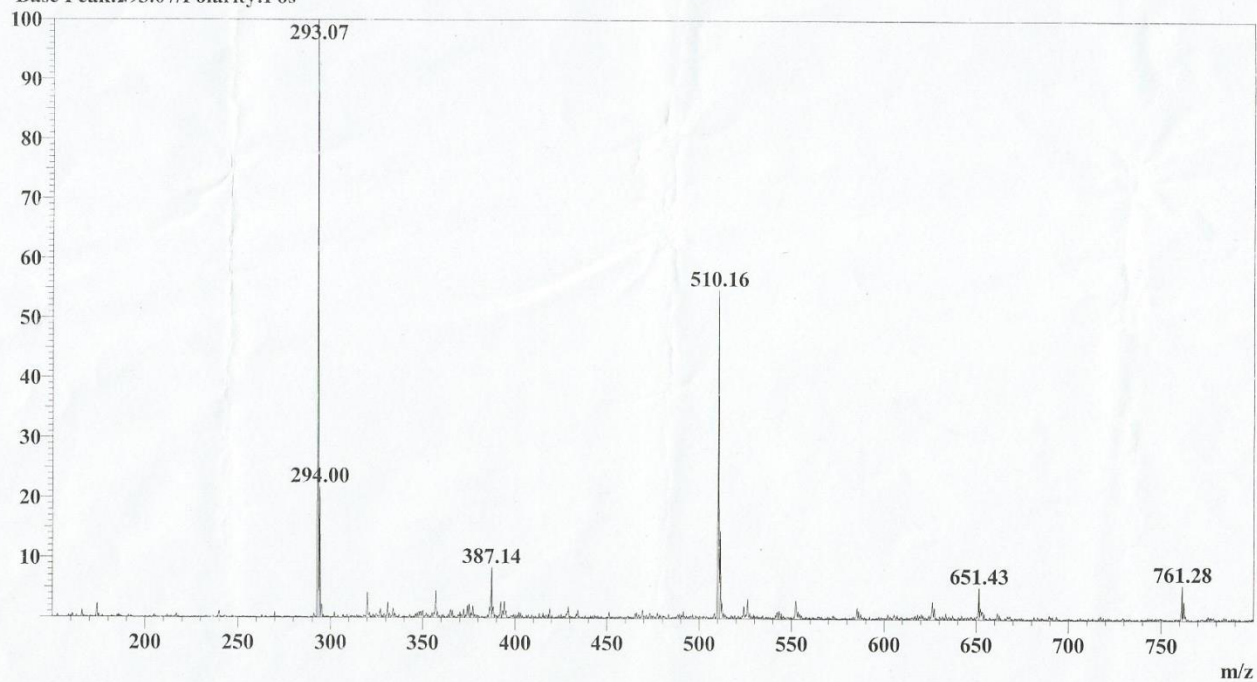

Tested by: K.Jyothi

Checked By: G.S.S.KUMAR

9/20/2013 11:49:46



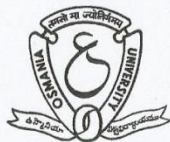

# CENTRAL FACILITIES - OSMANIA UNIVERSITY

## FTIR ANALYSIS REPORT

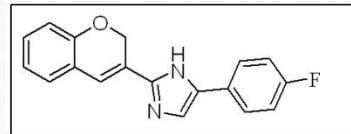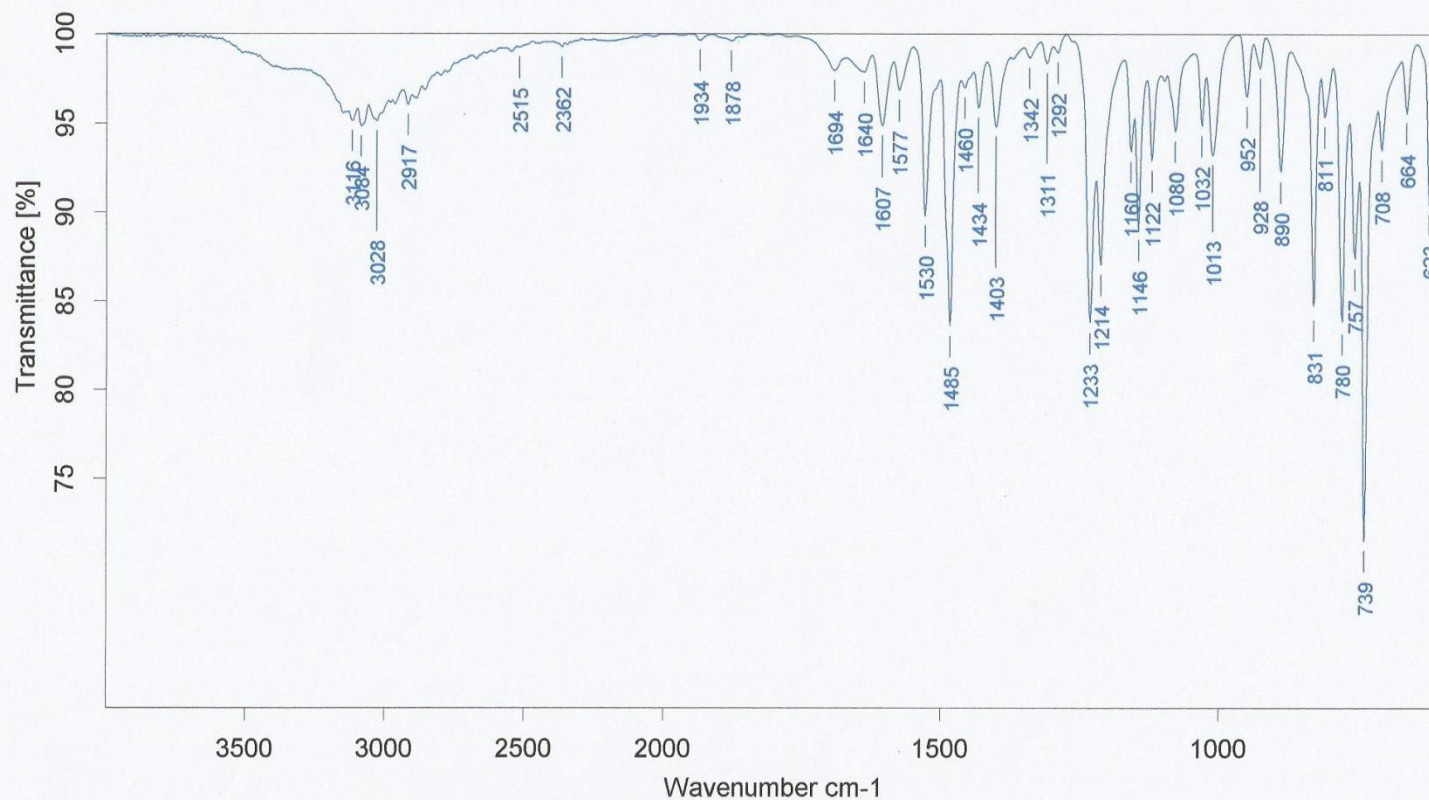

Sample Name: 1302-1052 13 CR- 1 Sample Form:ATR 27/02/2013 10:58:01 AM



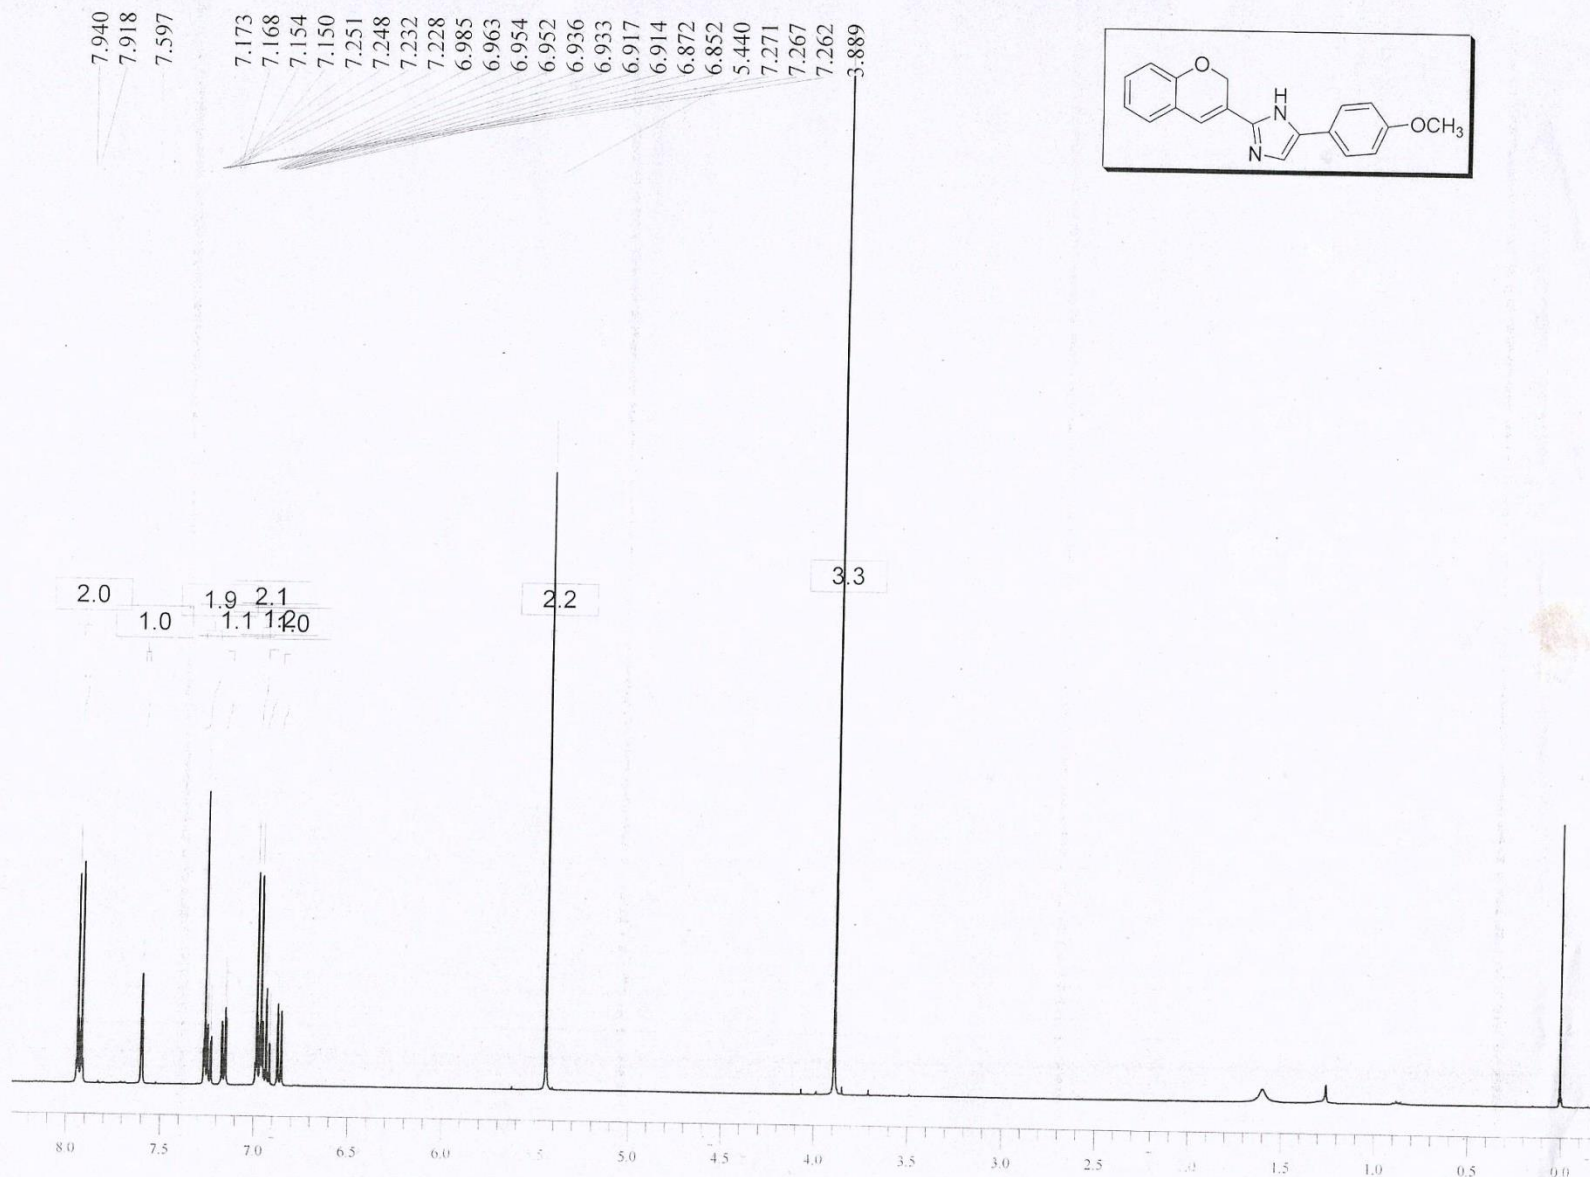

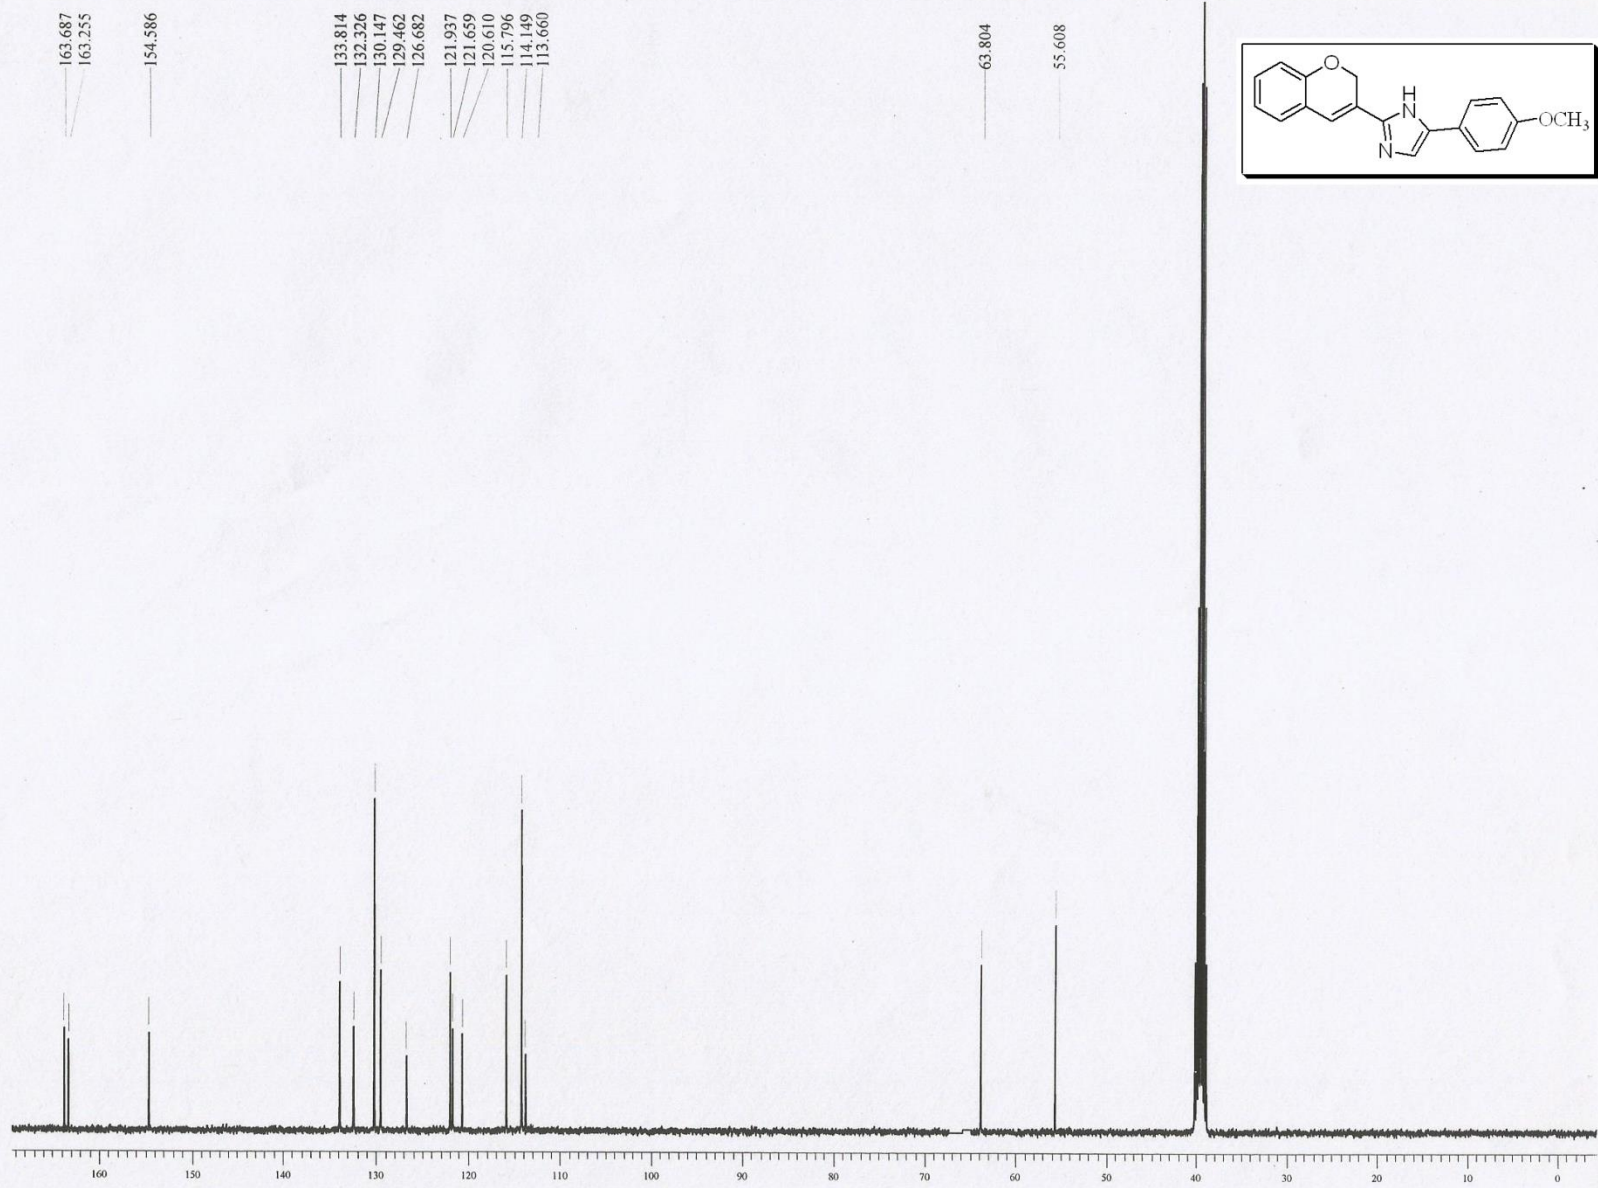

KOR/CDS/059/A

OSPL031211009 11 (0.222) Cm (6:18-(30+41))

03-Dec-2011 11:22:41

2: Scan ES-

9.35e6

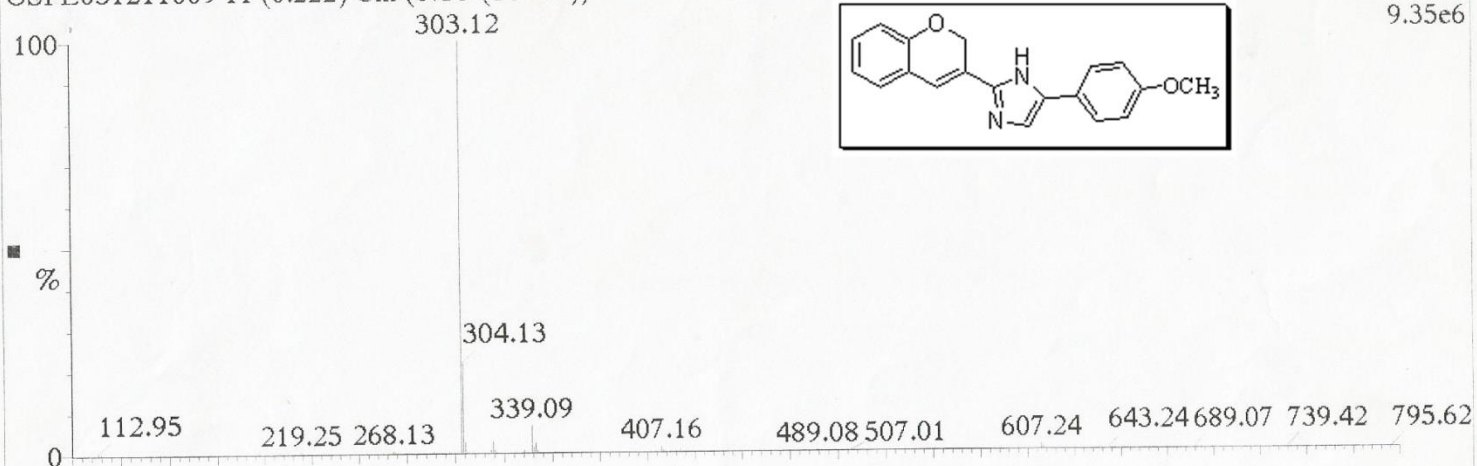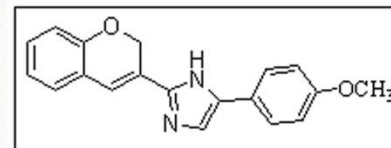

OSPL031211006 8 (0.151) Cm (7:24-(41+36))

1: Scan ES+

7.15e7

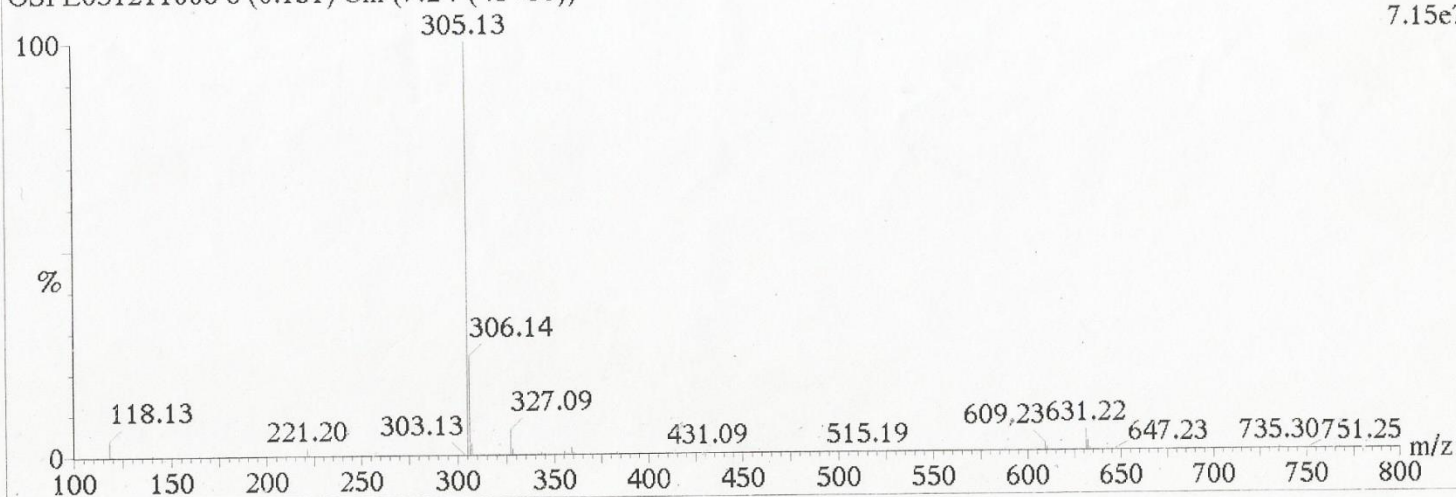



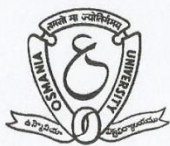

# CENTRAL FACILITIES - OSMANIA UNIVERSITY

## FTIR ANALYSIS REPORT

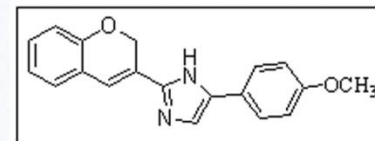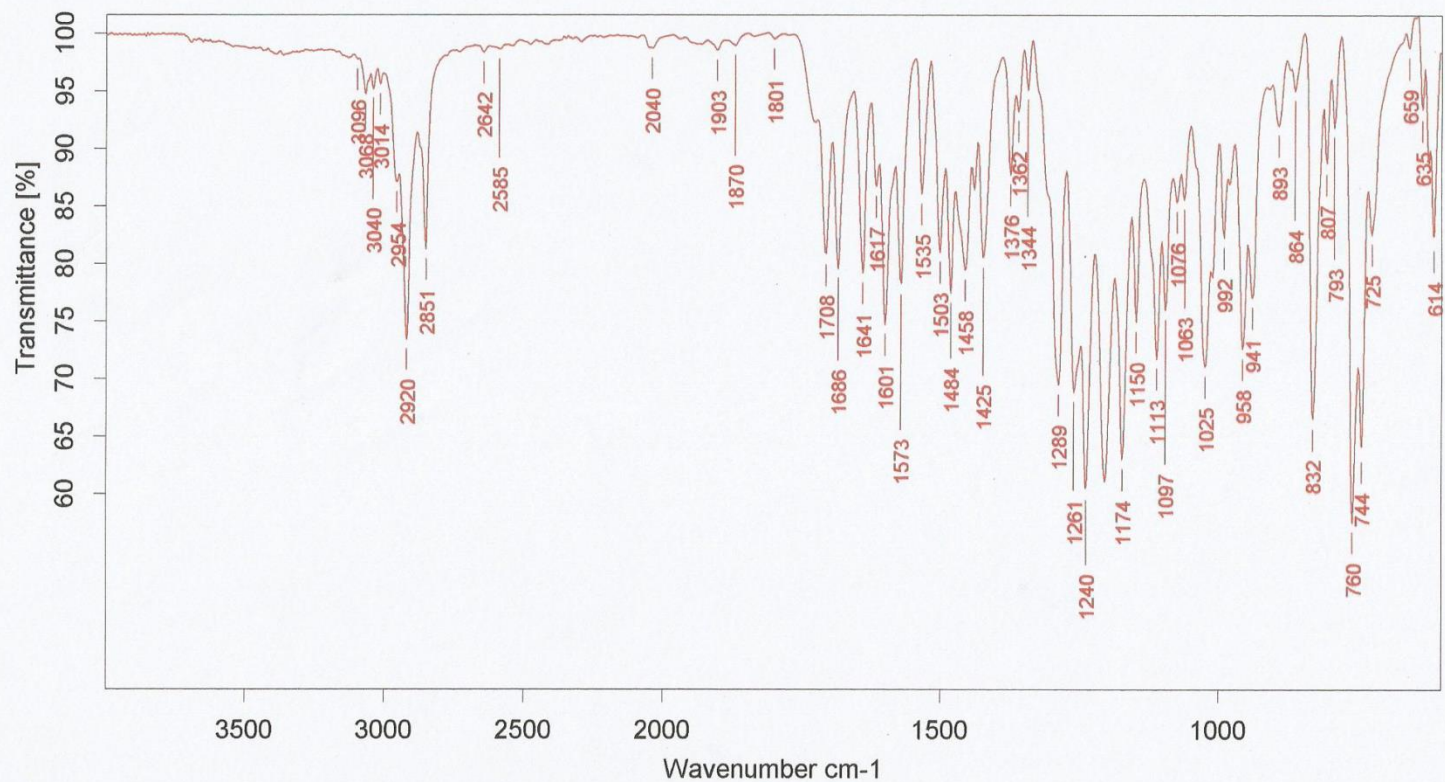

Sample Name: 1302-1052 14 CR- 2 Sample Form:ATR 27/02/2013 11:01:22 AM



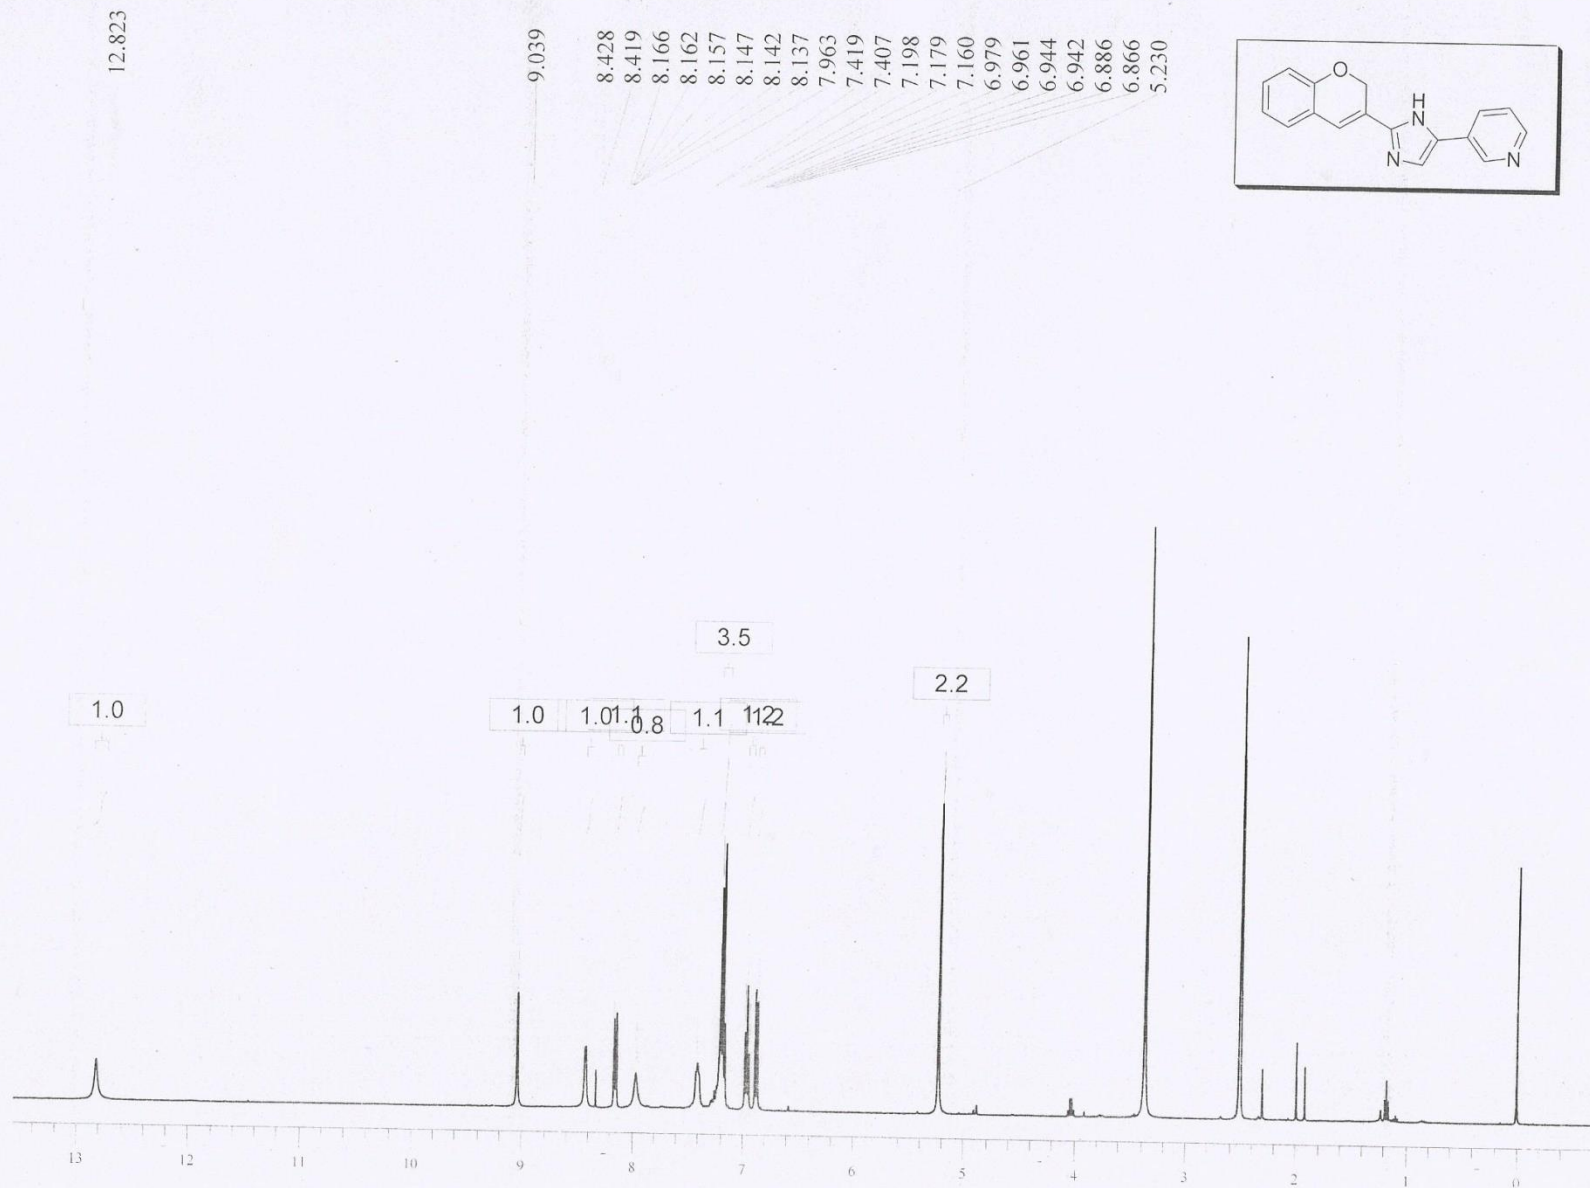

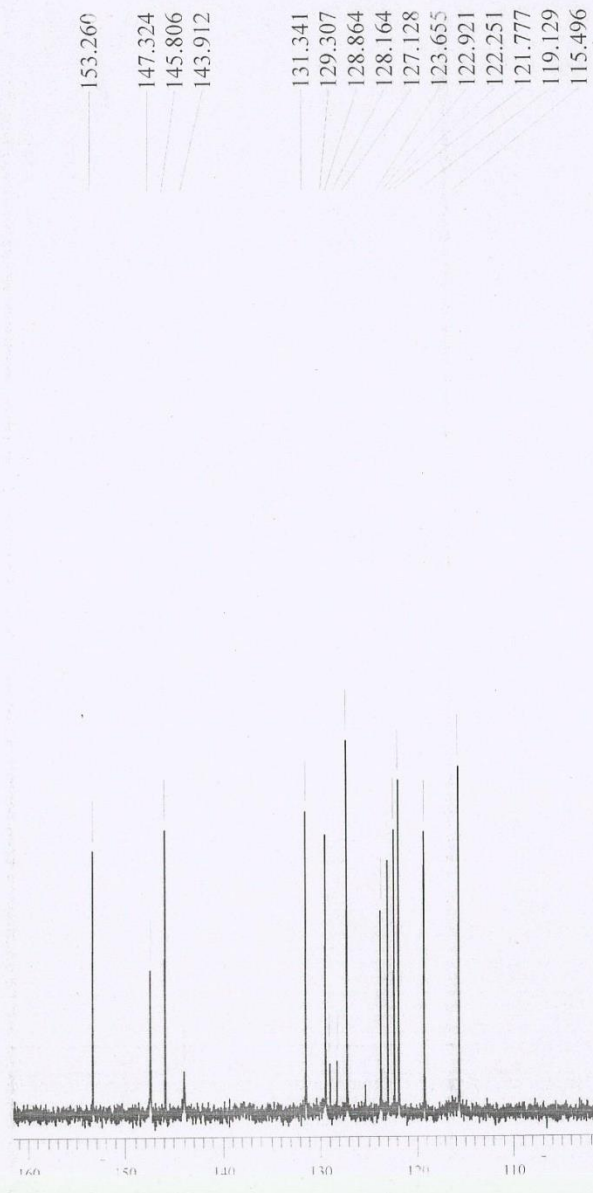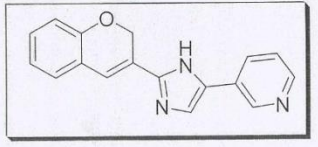

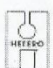

CR-20-Py/275  
HETERO (R & D)  
ARD

AD/LC-MS/01

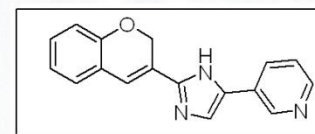

Sample Information

Sample Name : EB-5  
Date Acquired : 9/20/2013 10:53:22 AM  
Injection Volume : 10µl  
Data File : DM200914.lcd  
Method File : ESI METHOD POS.lcm  
Tuning File : E:\LabSolution\Project\Auto Tuning-ESI-080513.lct  
Operator Id : K.Jyothi

MS Spectrum Graph

Base Peak: 276.02/Polarity: Pos

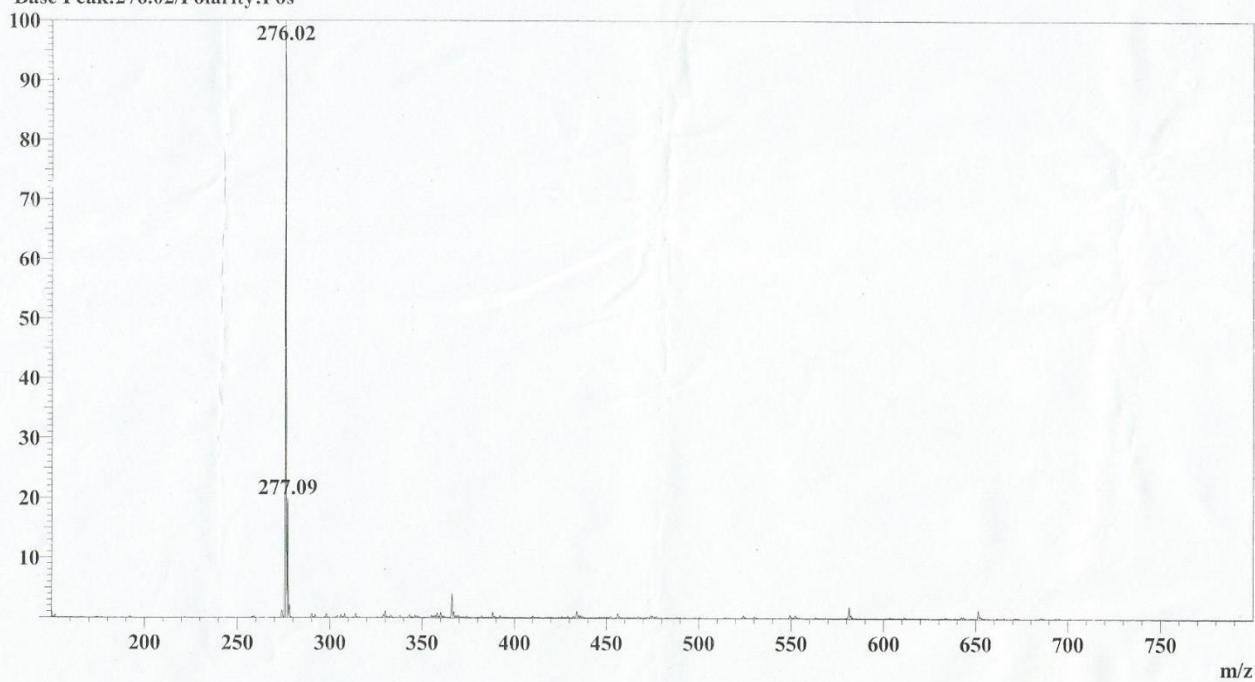

Tested by: K. Jyothi

Checked By: G.S.S. KUMAR

9/20/2013 11:51:09

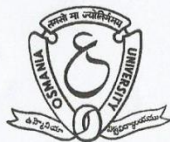

# CENTRAL FACILITIES - OSMANIA UNIVERSITY

## FTIR ANALYSIS REPORT

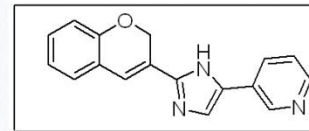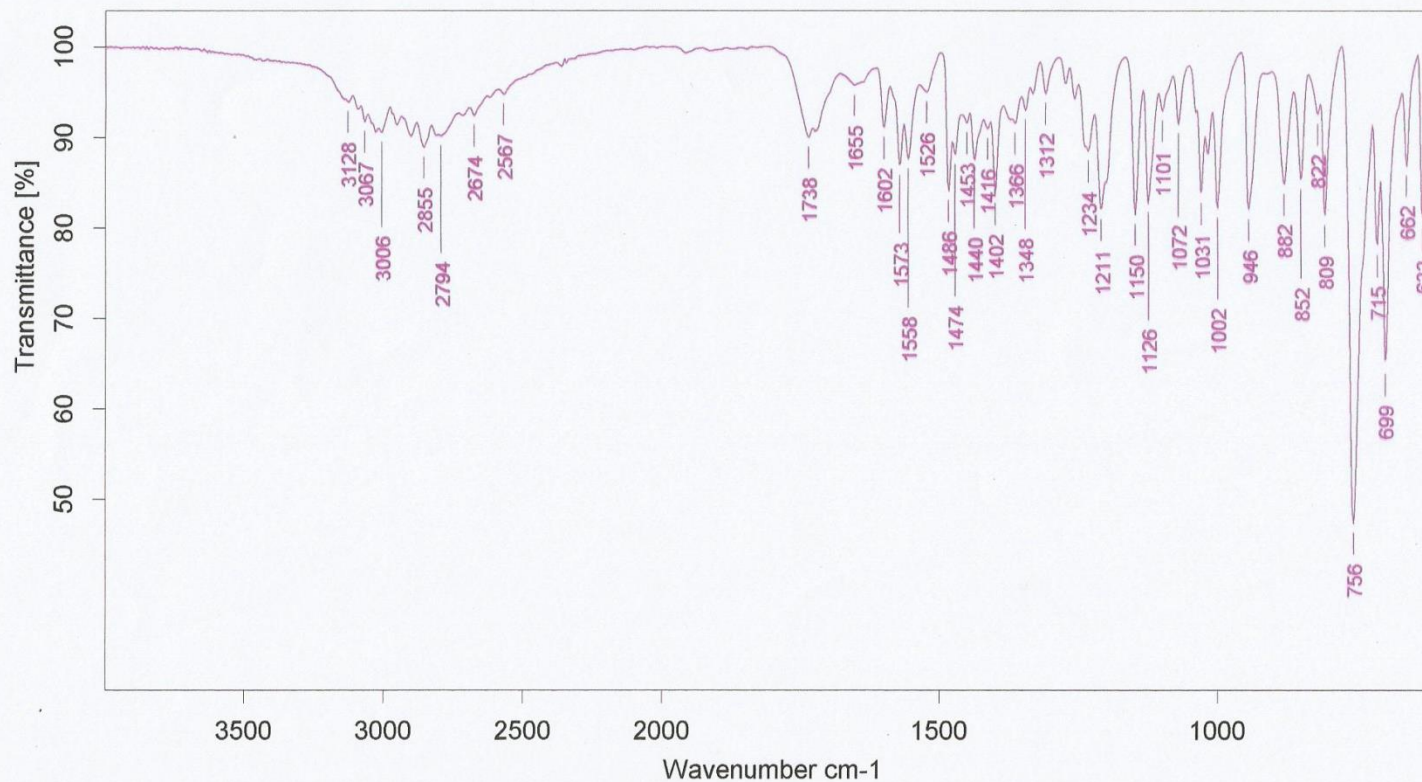

Sample Name: 1302-1052 15 CR-3 Sample Form:ATR 27/02/2013 11:04:24 AM



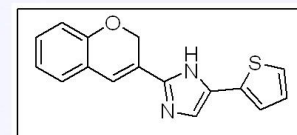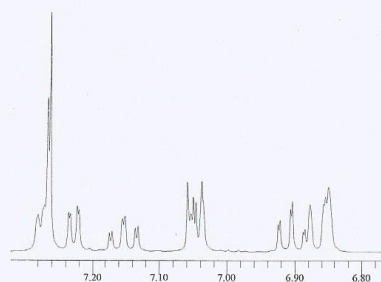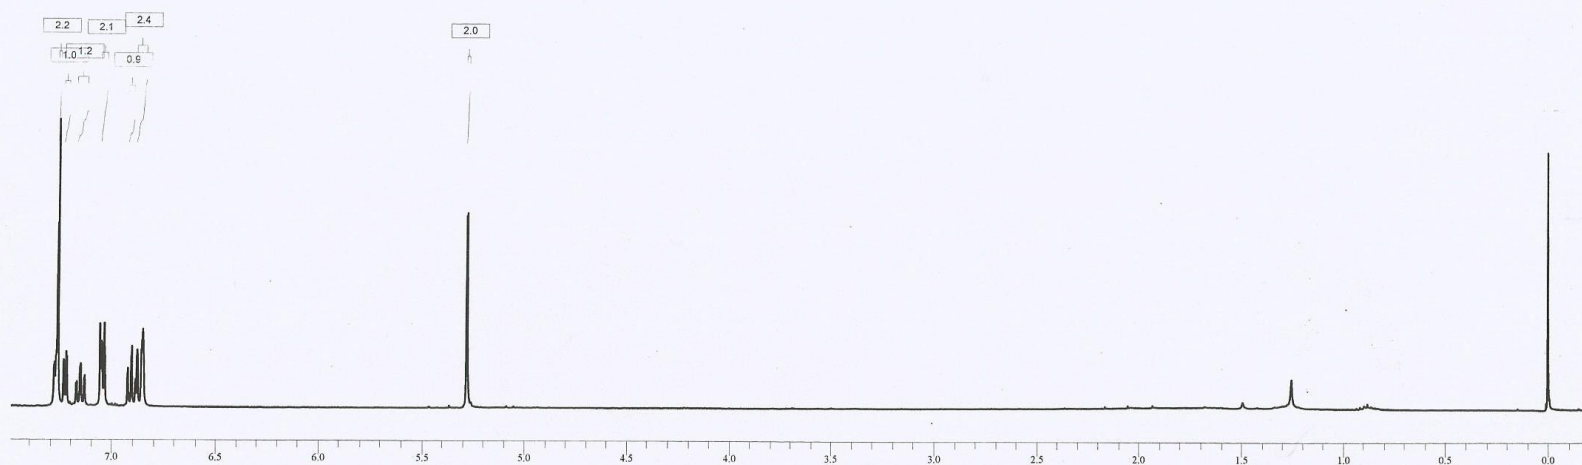



28052013-043 4 (0.337) Cm (3:6-(7:13+1:2))

5: Scan ES+  
1.27e8

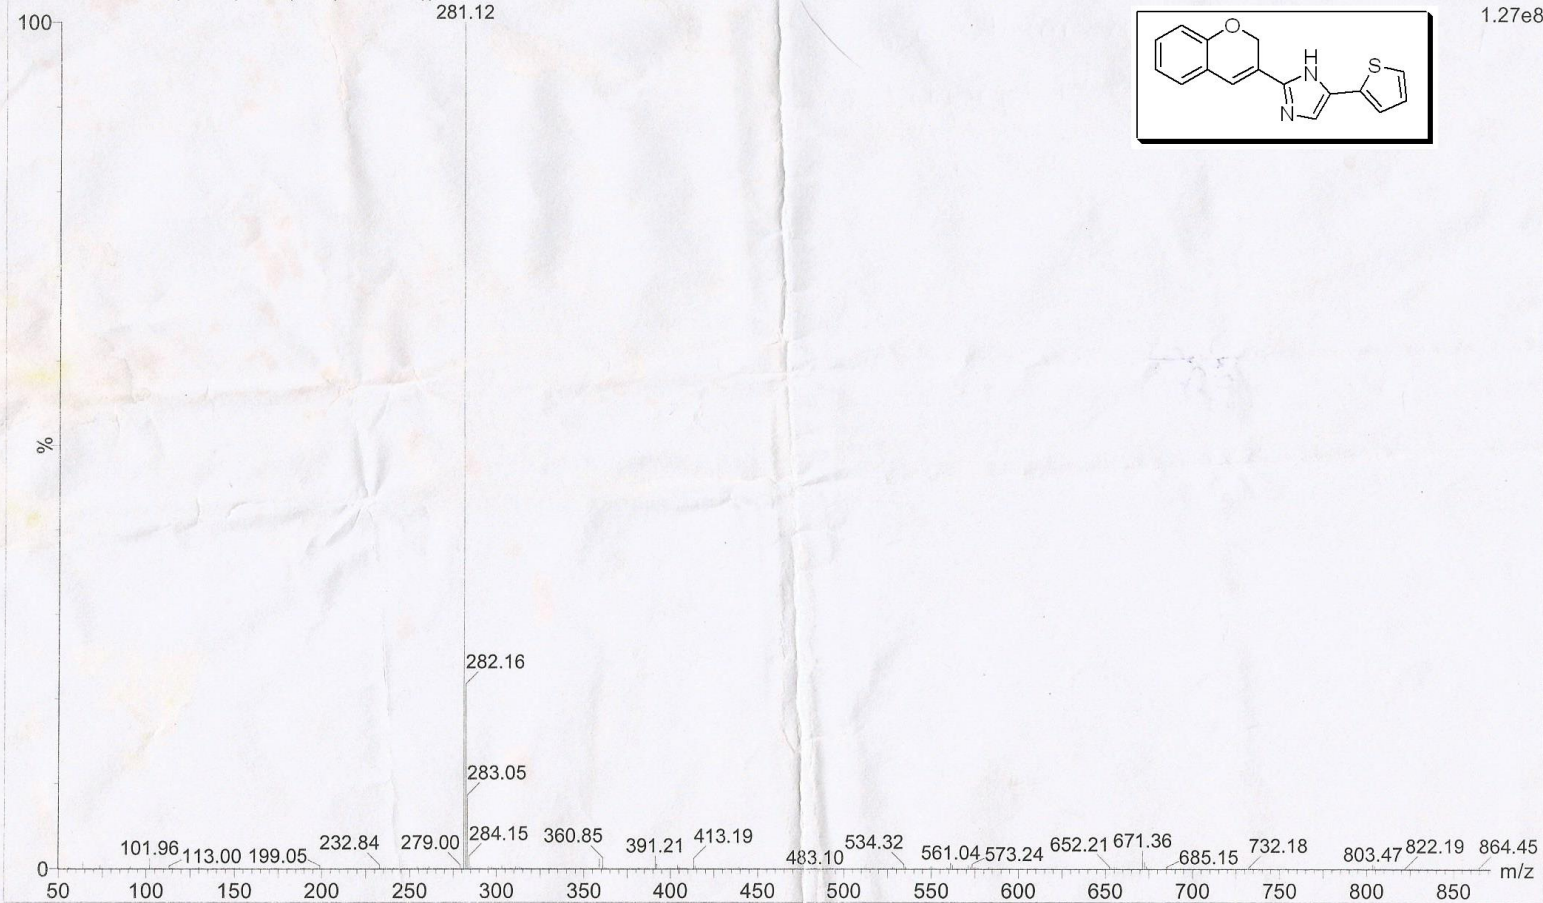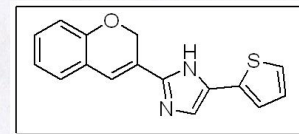



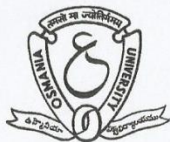

# CENTRAL FACILITIES - OSMANIA UNIVERSITY

## FTIR ANALYSIS REPORT

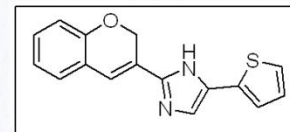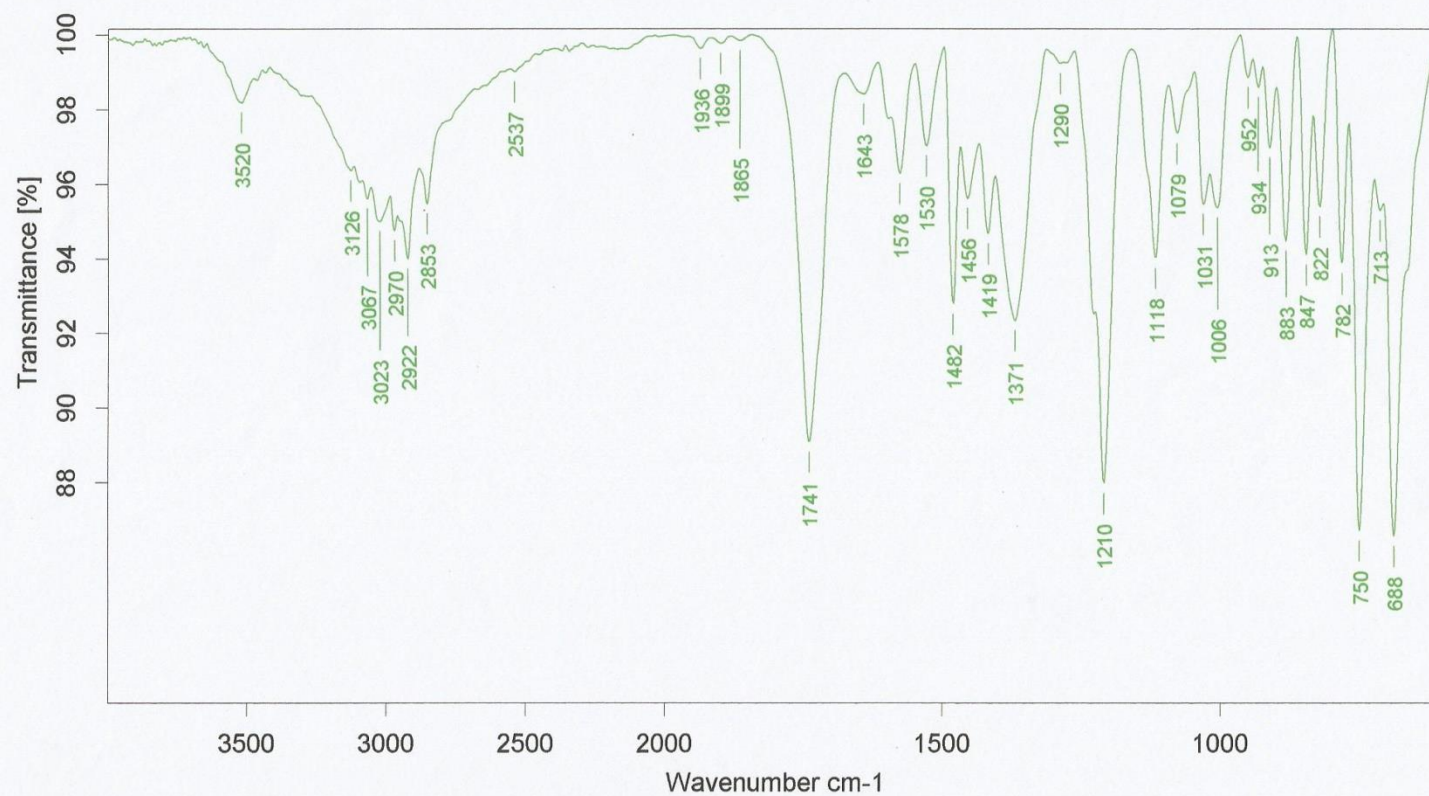

Sample Name: 1302-1052 16 CR-4 Sample Form:ATR 27/02/2013 11:06:52 AM



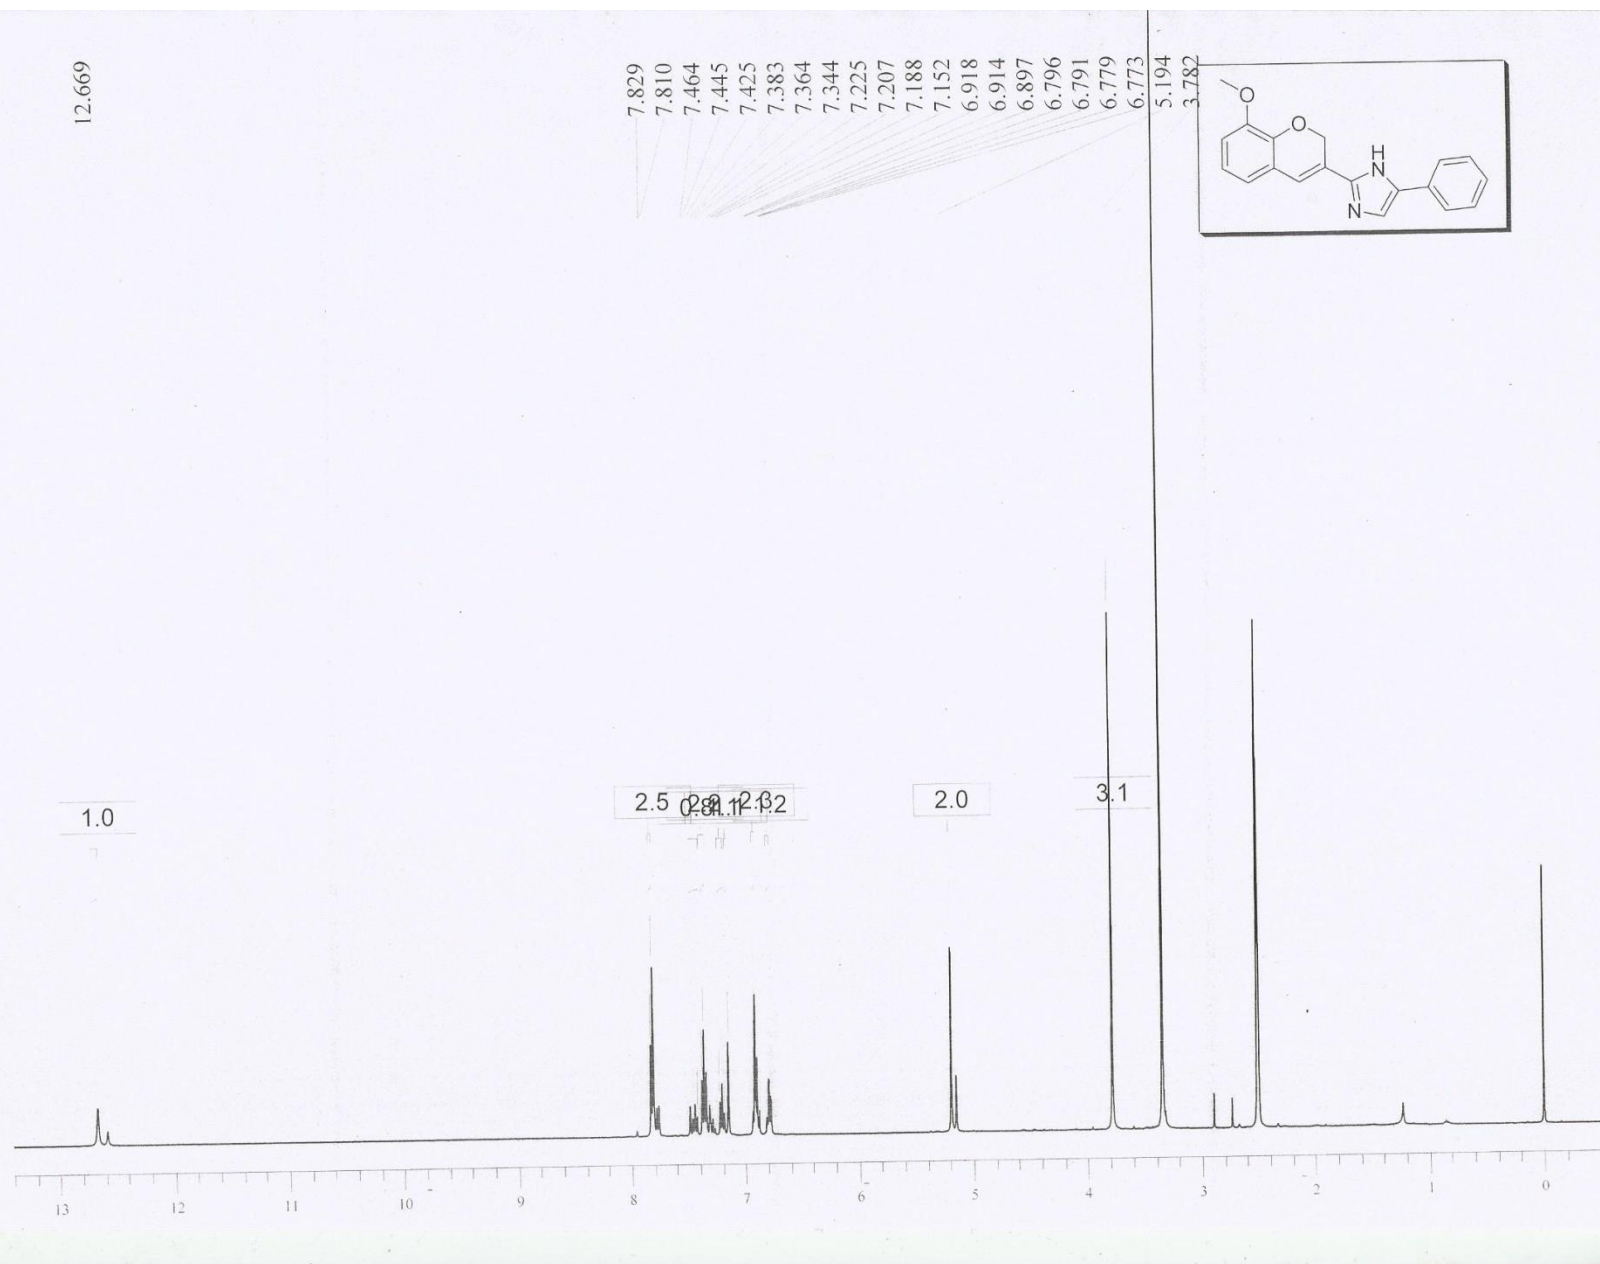

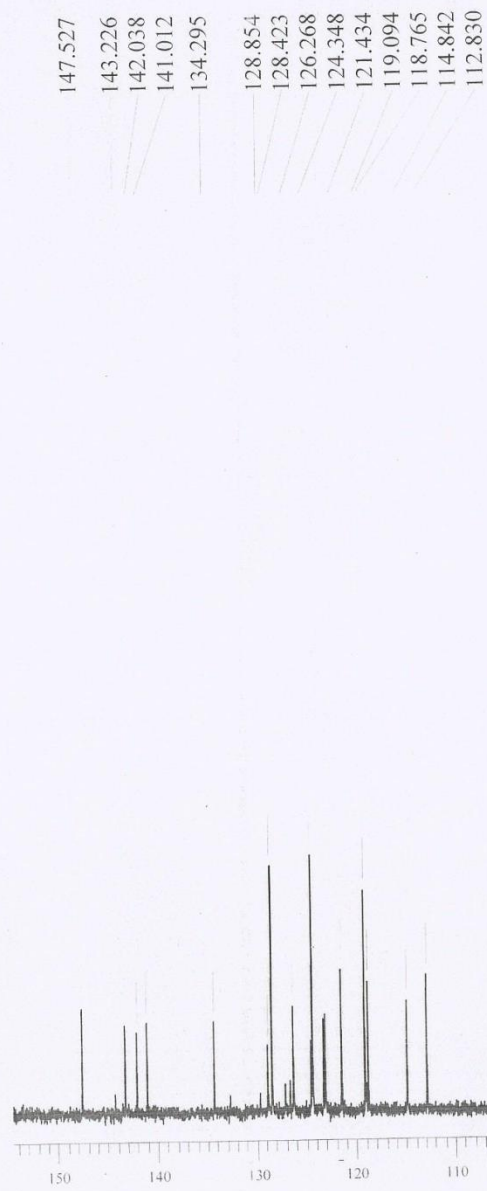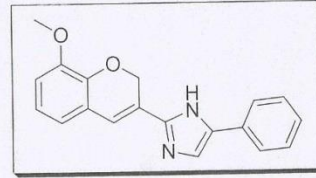

29042013-013 4 (0.325) Cm (1:6-11:22)

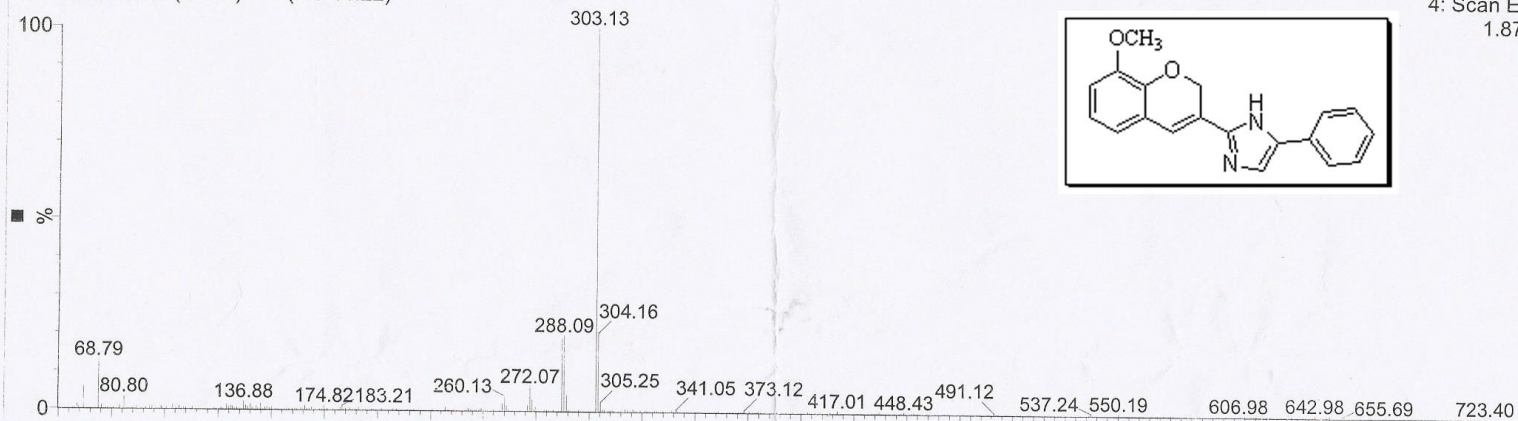

4: Scan ES-  
1.87e6

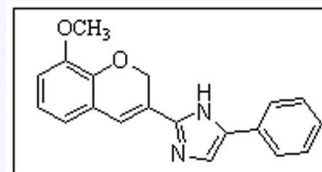

29042013-013 4 (0.337) Cm (2:9-10:22)

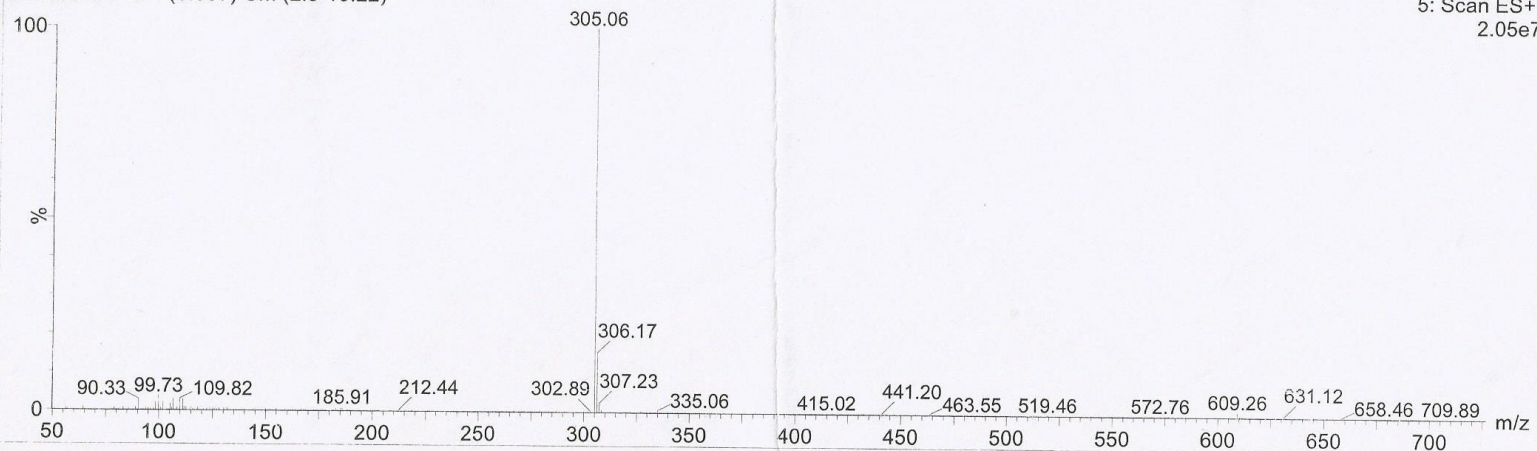

5: Scan ES+  
2.05e7



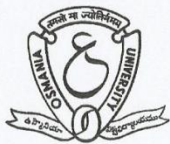

# CENTRAL FACILITIES - OSMANIA UNIVERSITY

## FTIR ANALYSIS REPORT

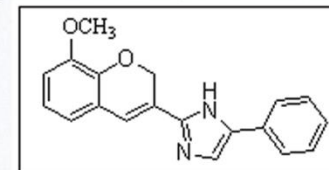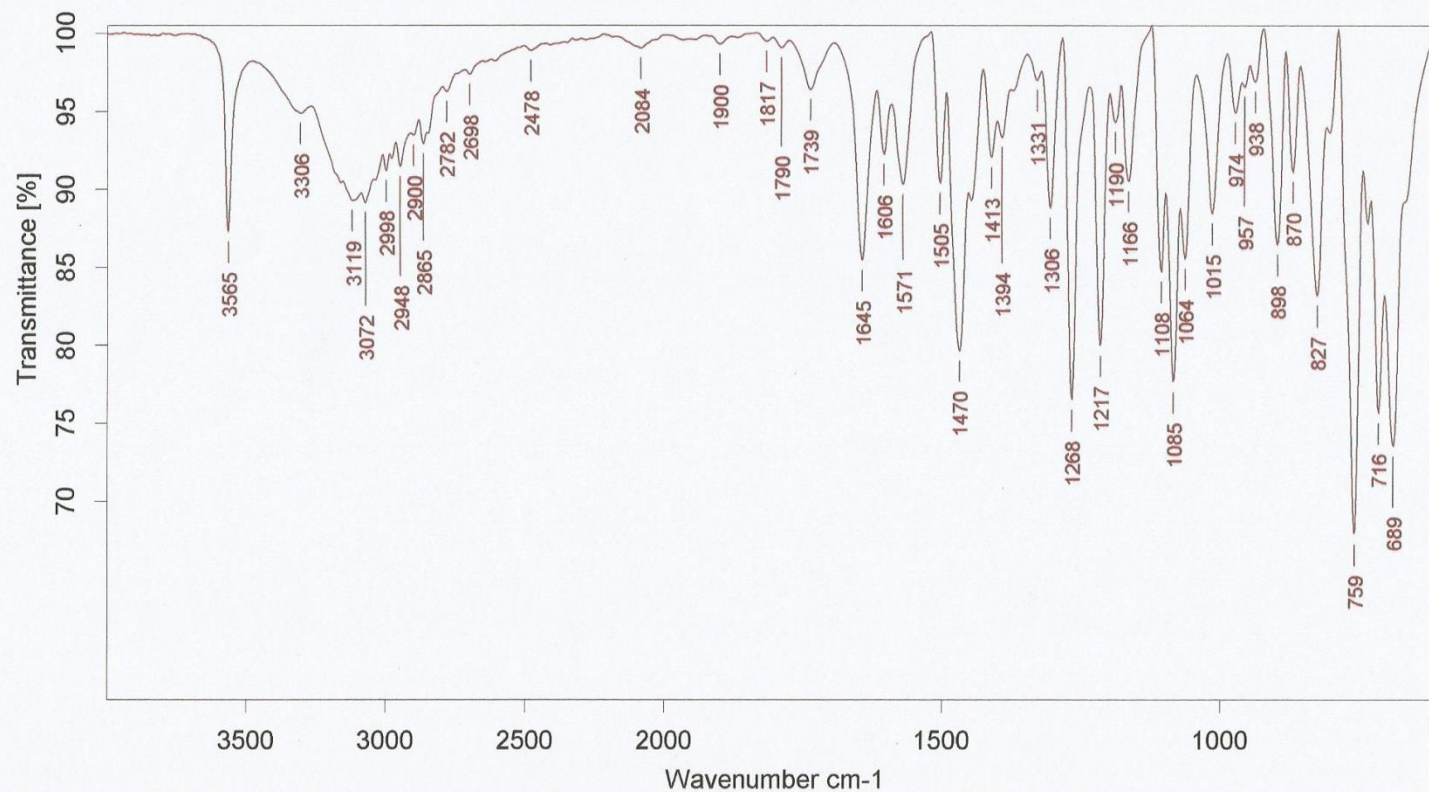

Sample Name: 1302-1052 22 8CR- 1 Sample Form:ATR 27/02/2013 2:04:00 PM



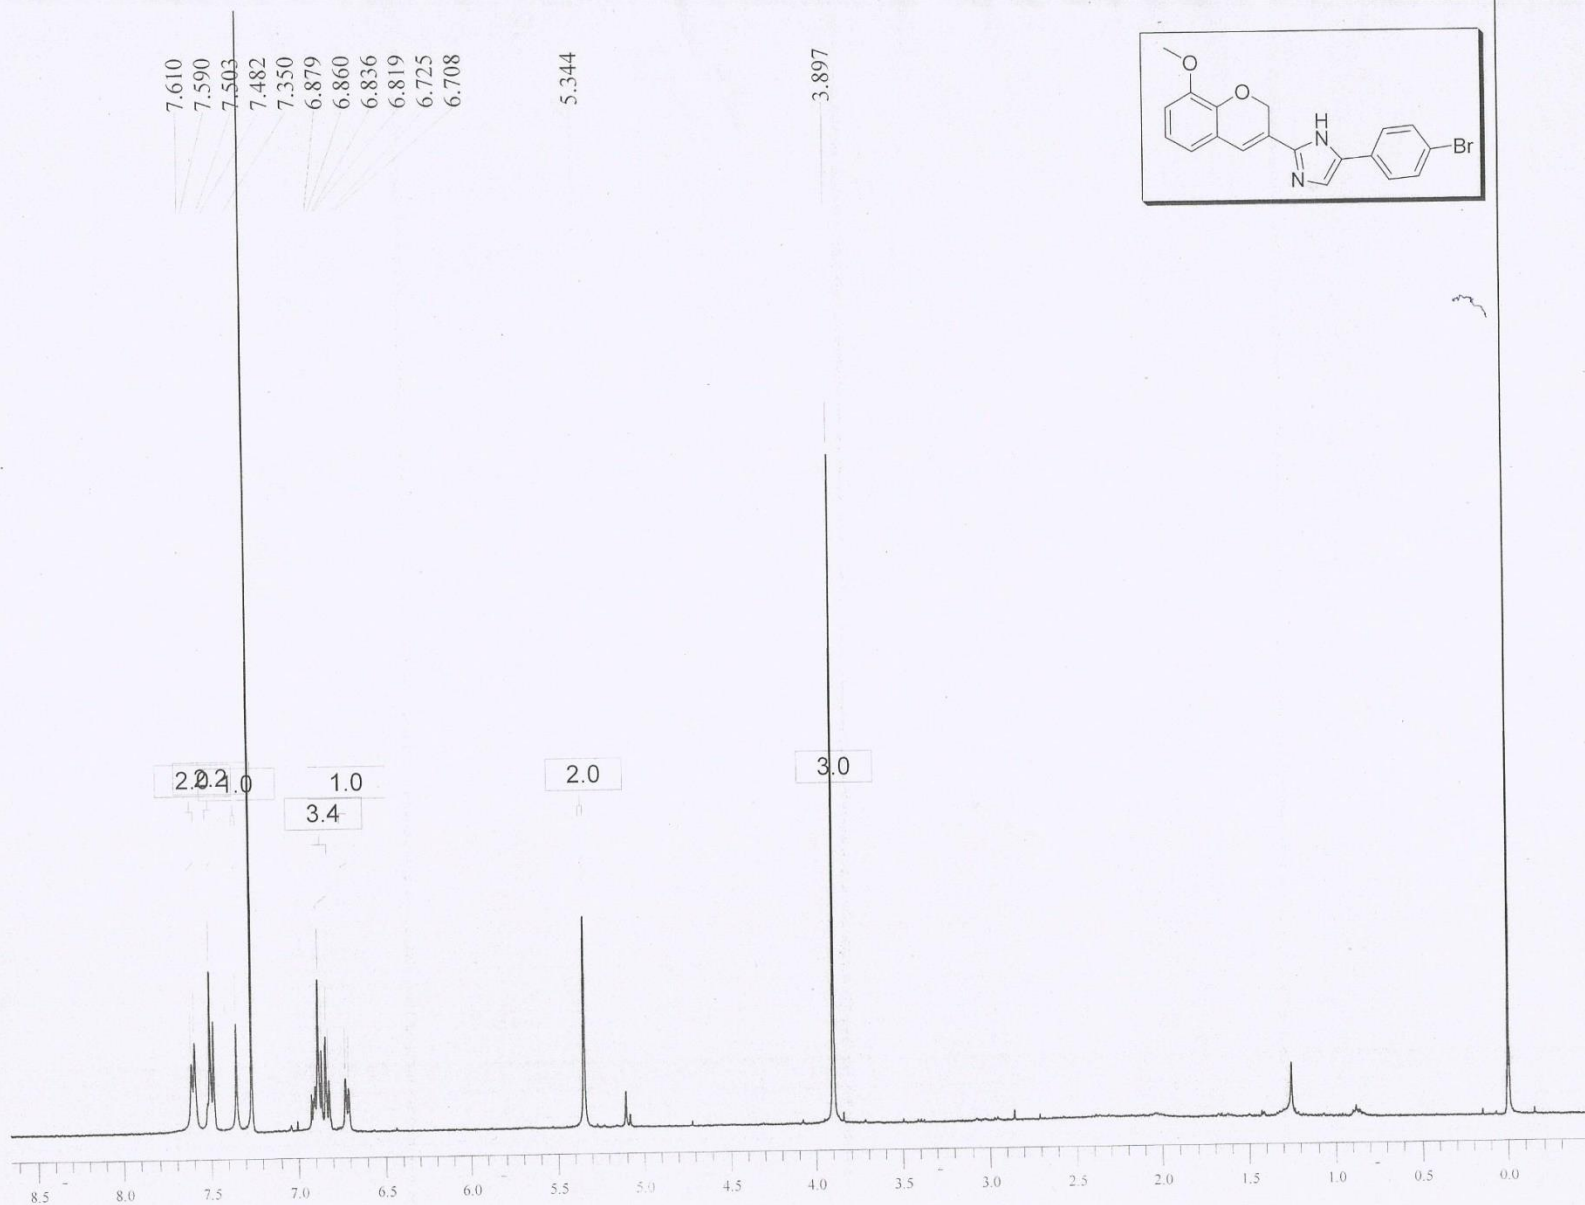

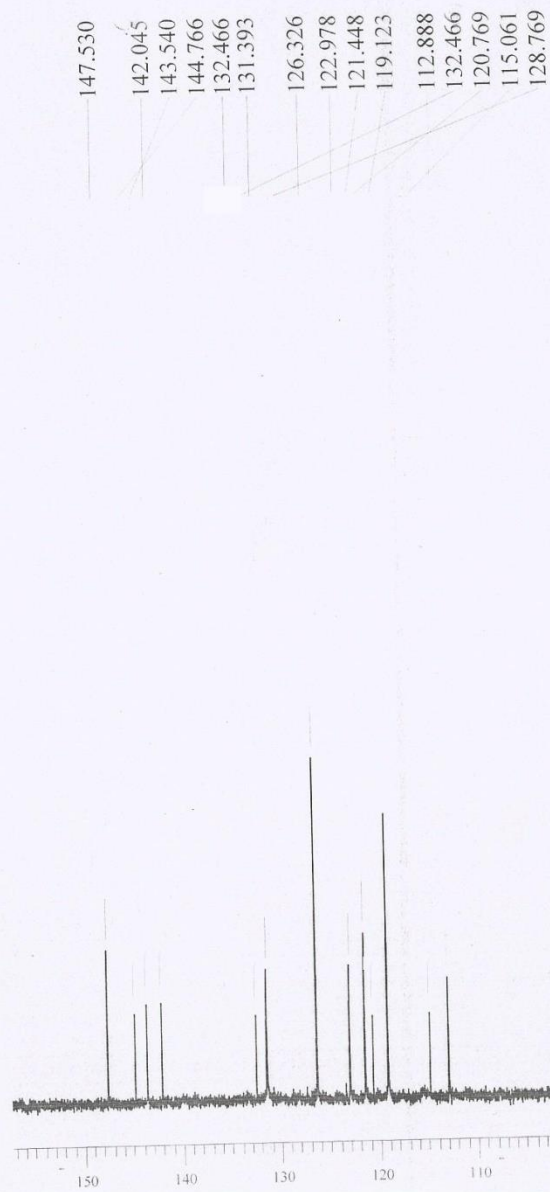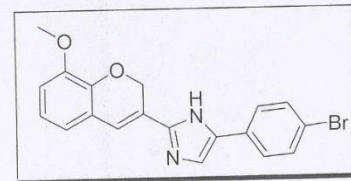

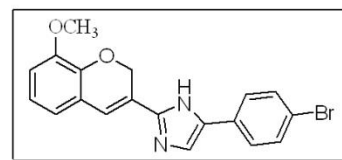

Scan ES+  
2.04e7

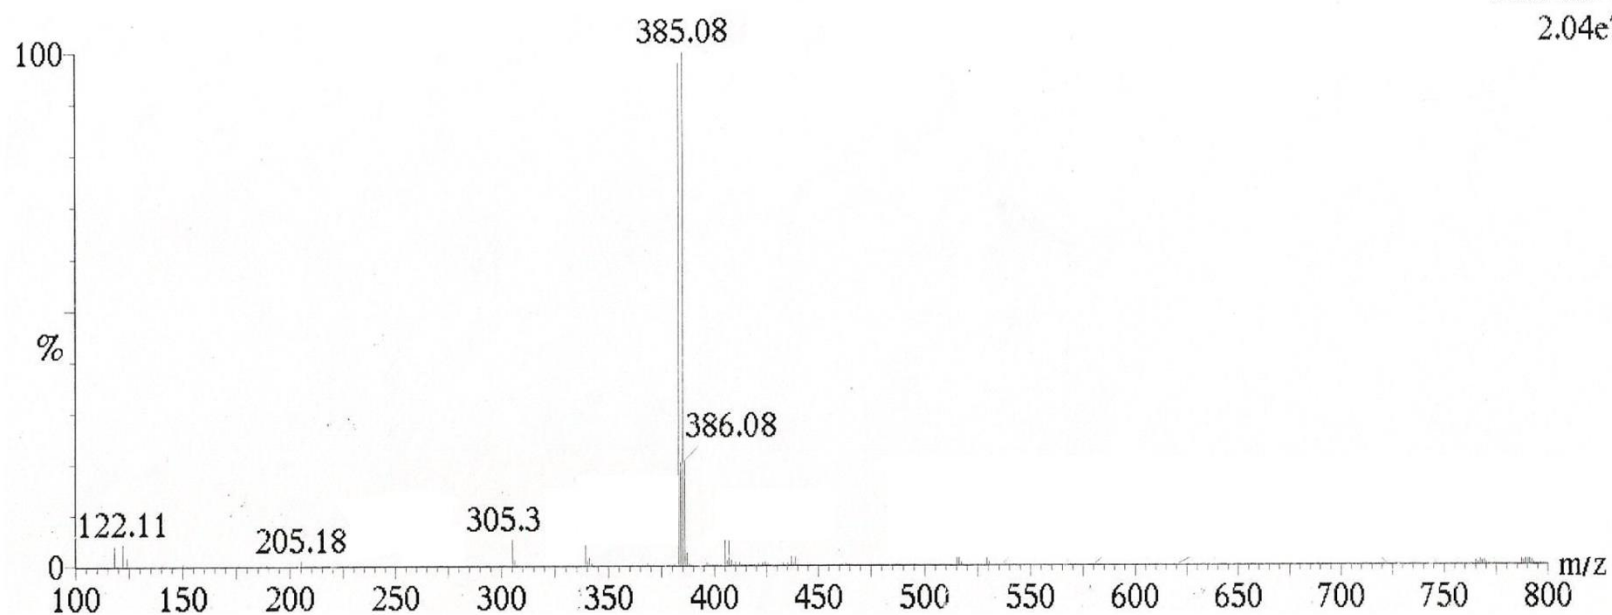

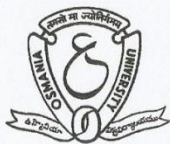

# CENTRAL FACILITIES - OSMANIA UNIVERSITY

## FTIR ANALYSIS REPORT

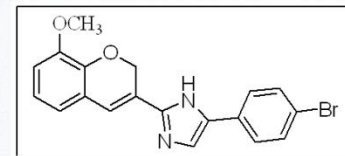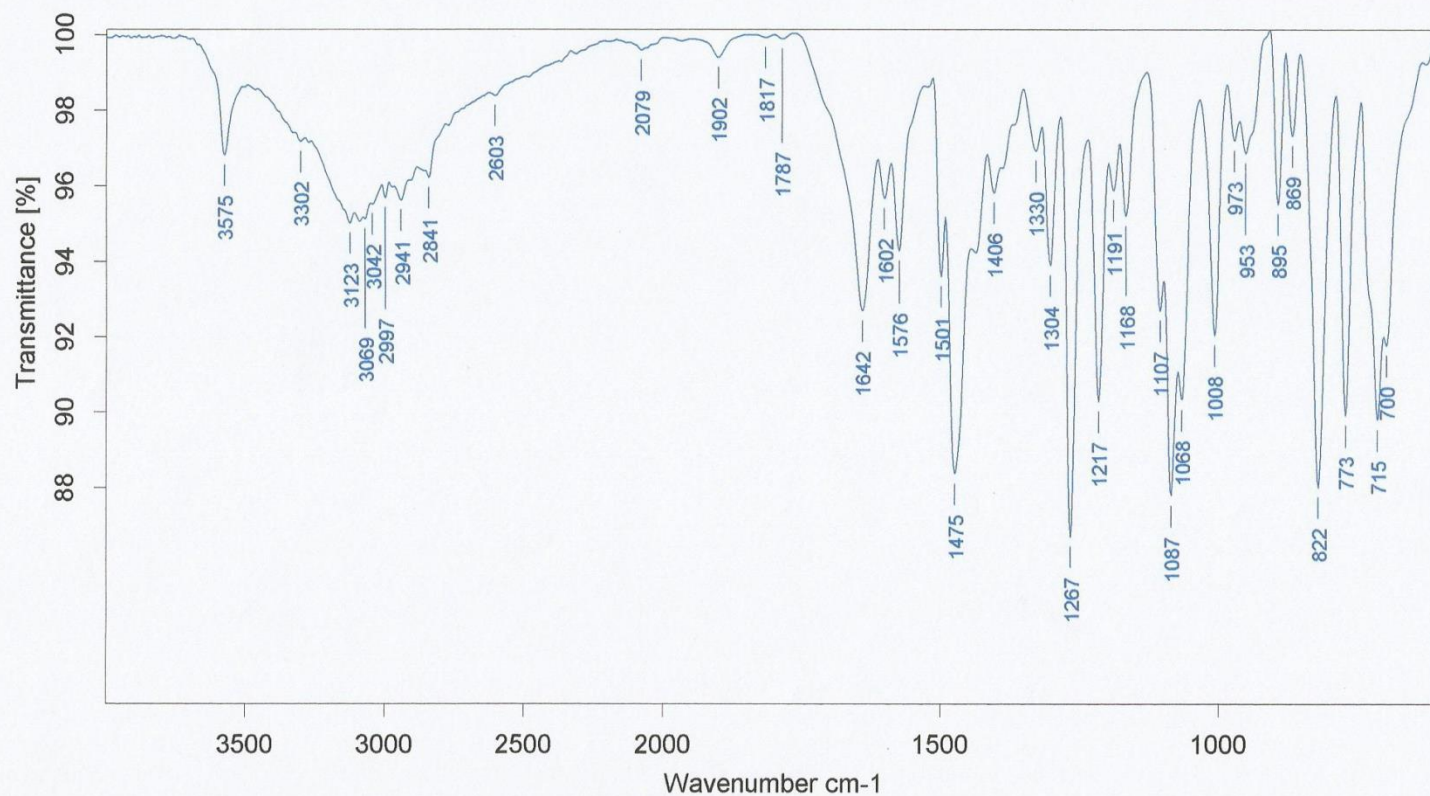

Sample Name: 1302-1052 23 8CR- 2 Sample Form:ATR 28/02/2013 11:14:34 AM



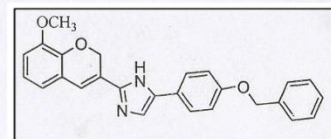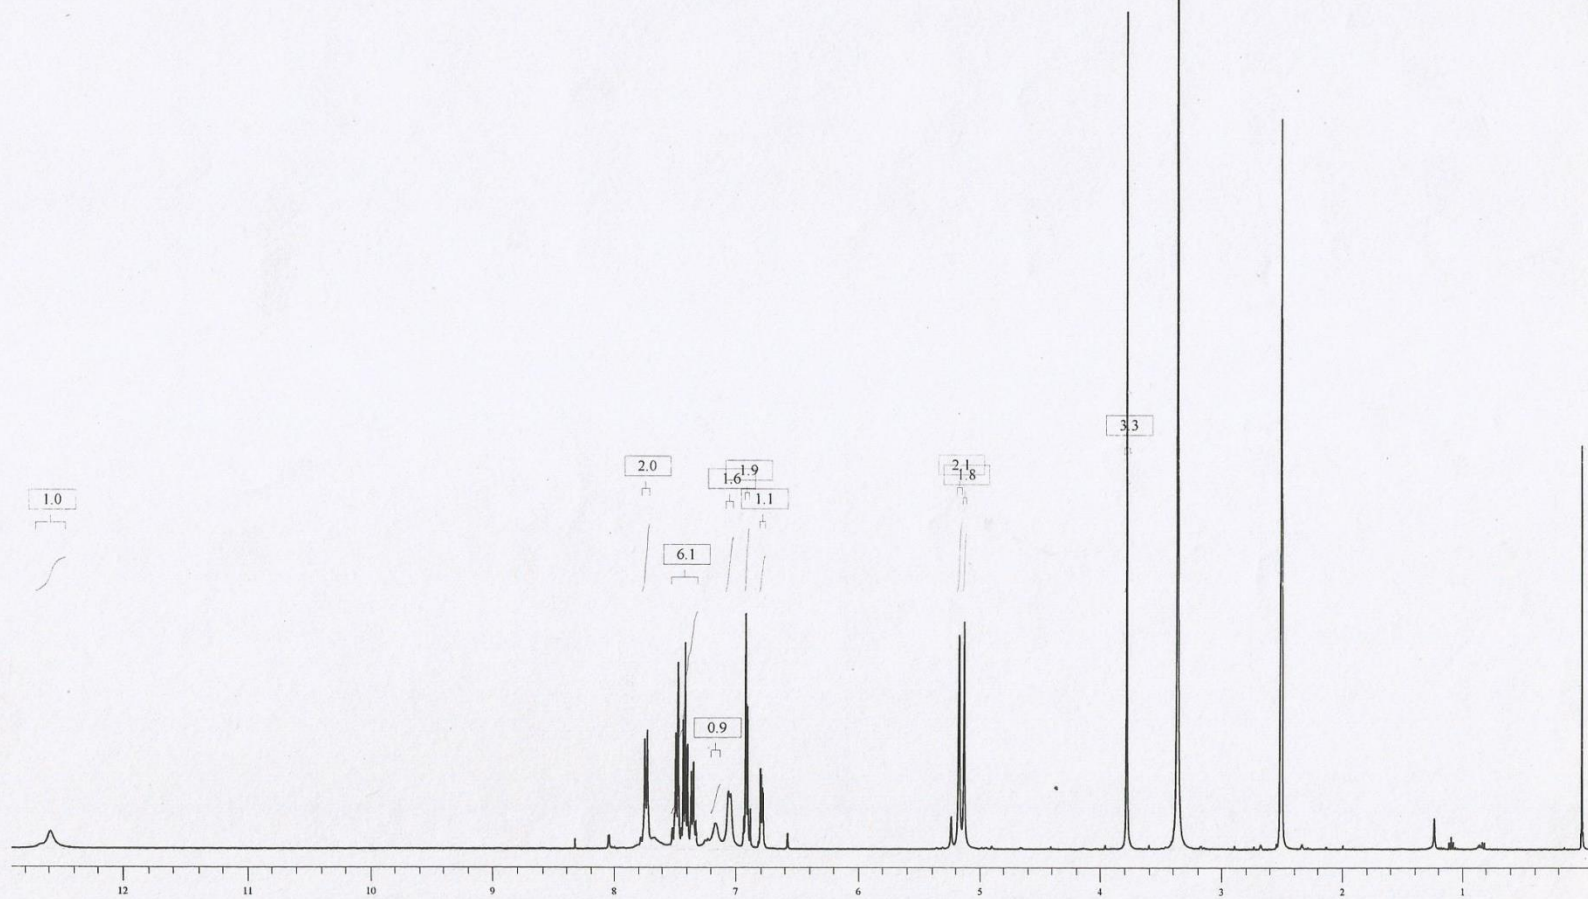

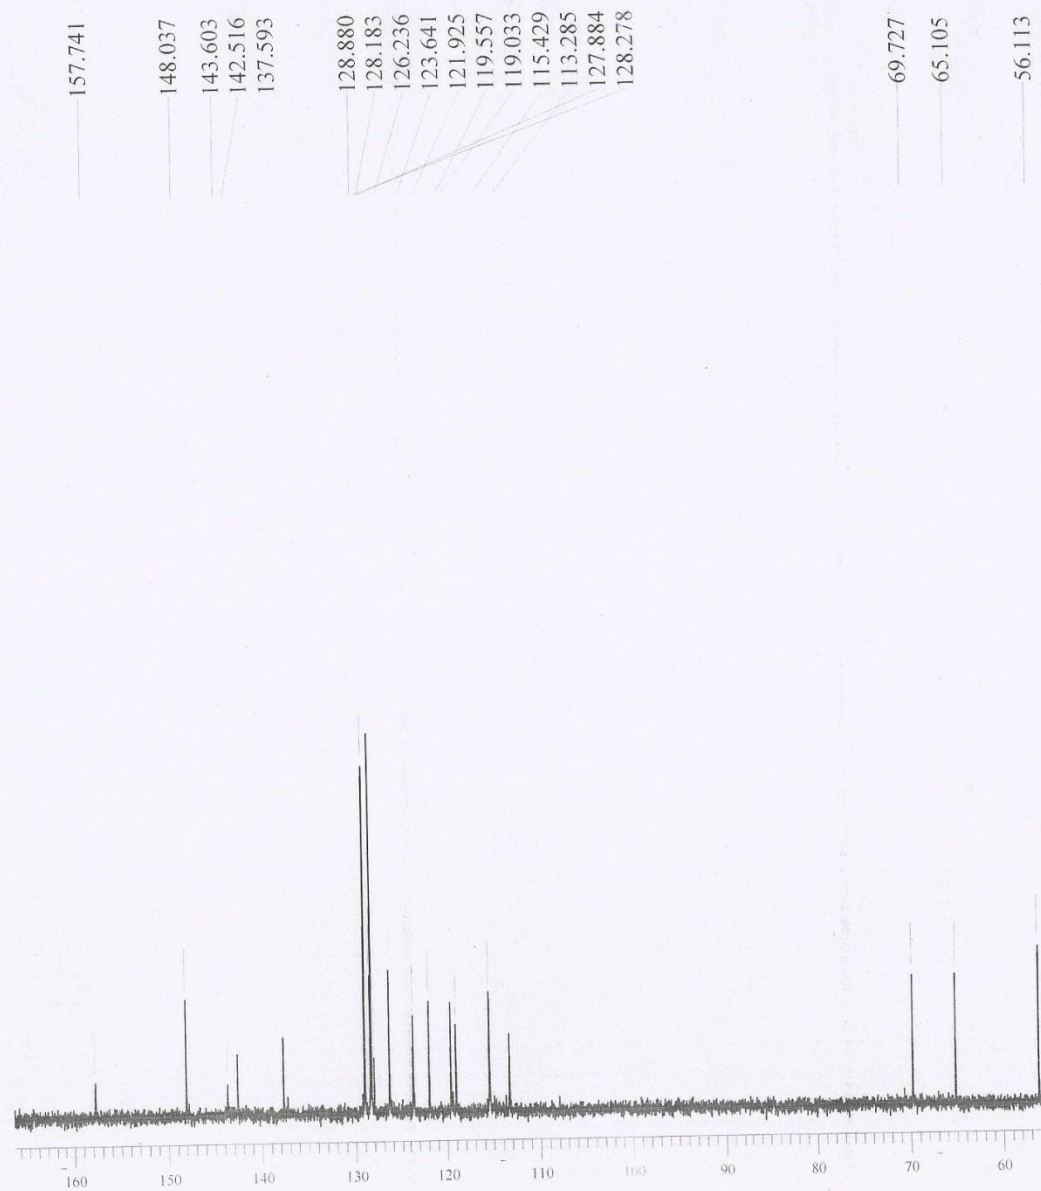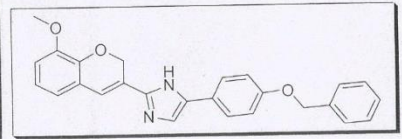

16032013-018 3 (0.244) Cm (2:6-11:22)

5: Scan ES+  
1.22e7

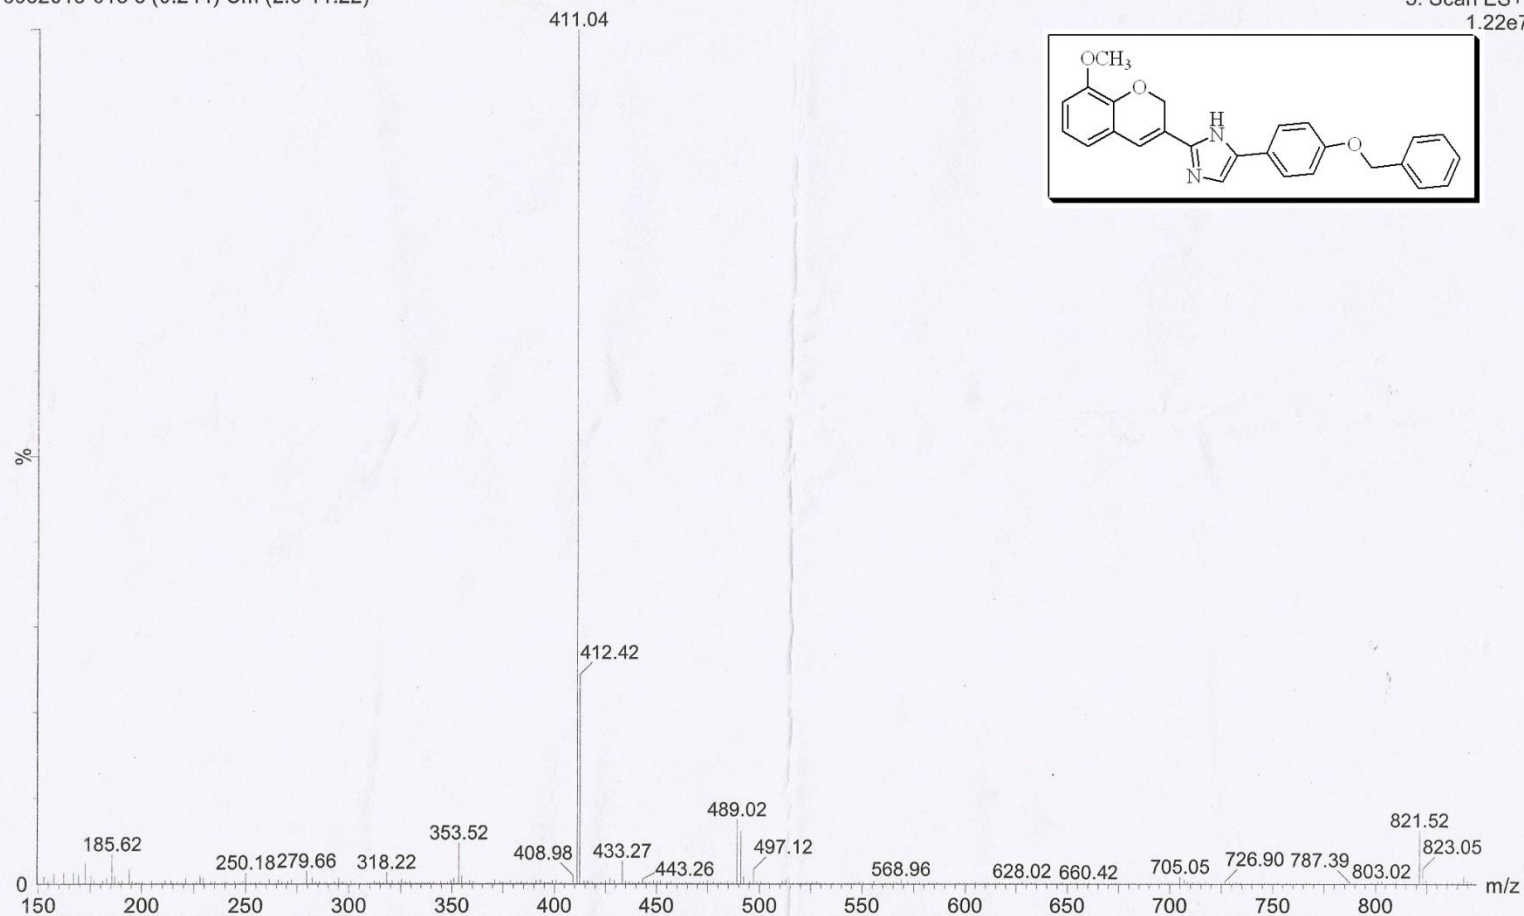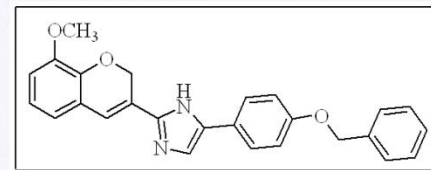



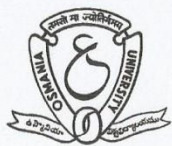

# CENTRAL FACILITIES - OSMANIA UNIVERSITY

## FTIR ANALYSIS REPORT

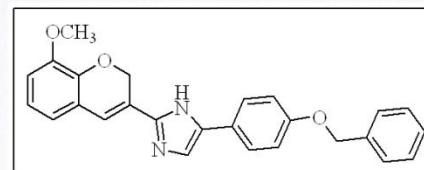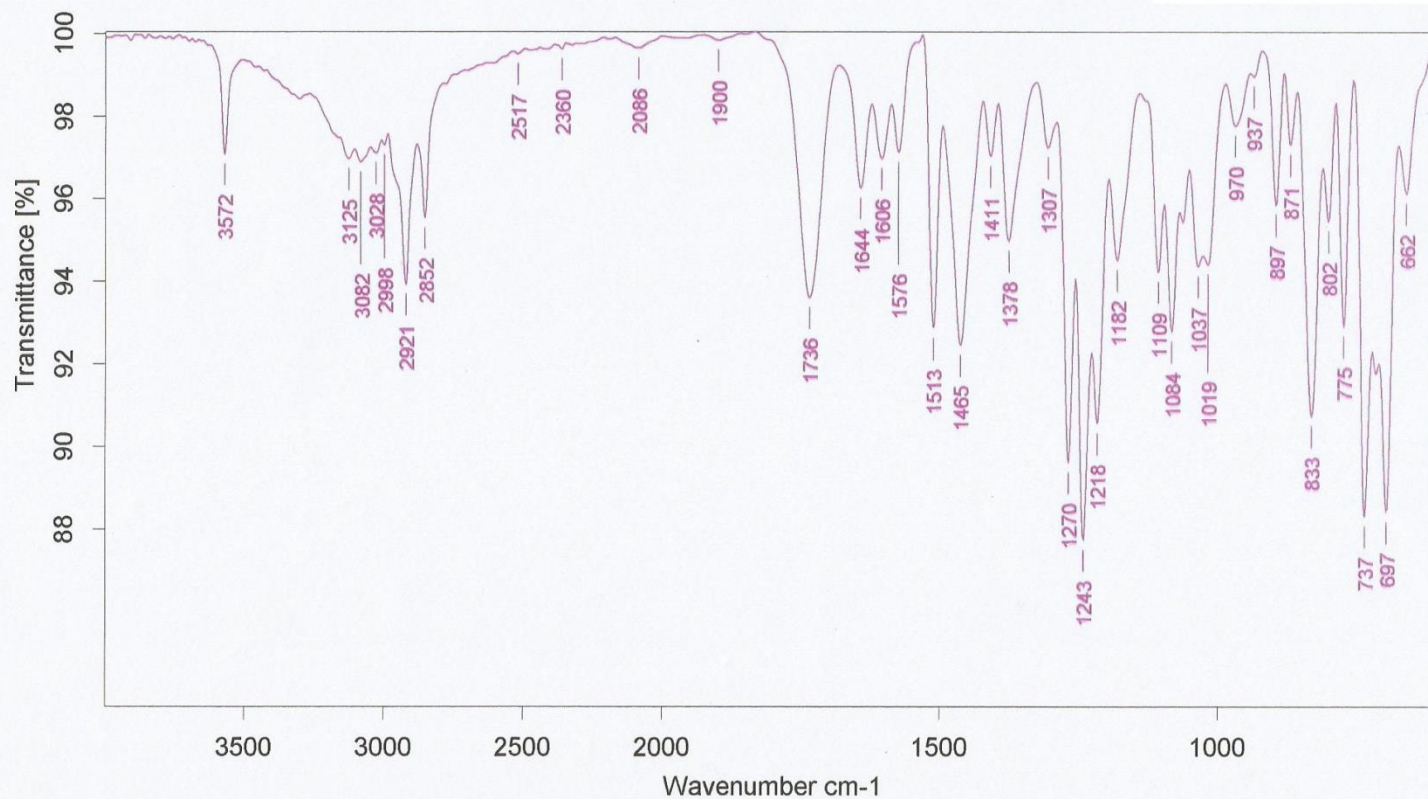

Sample Name: 1302-1052 25 8CR- 4 Sample Form:ATR 28/02/2013 11:24:07 AM



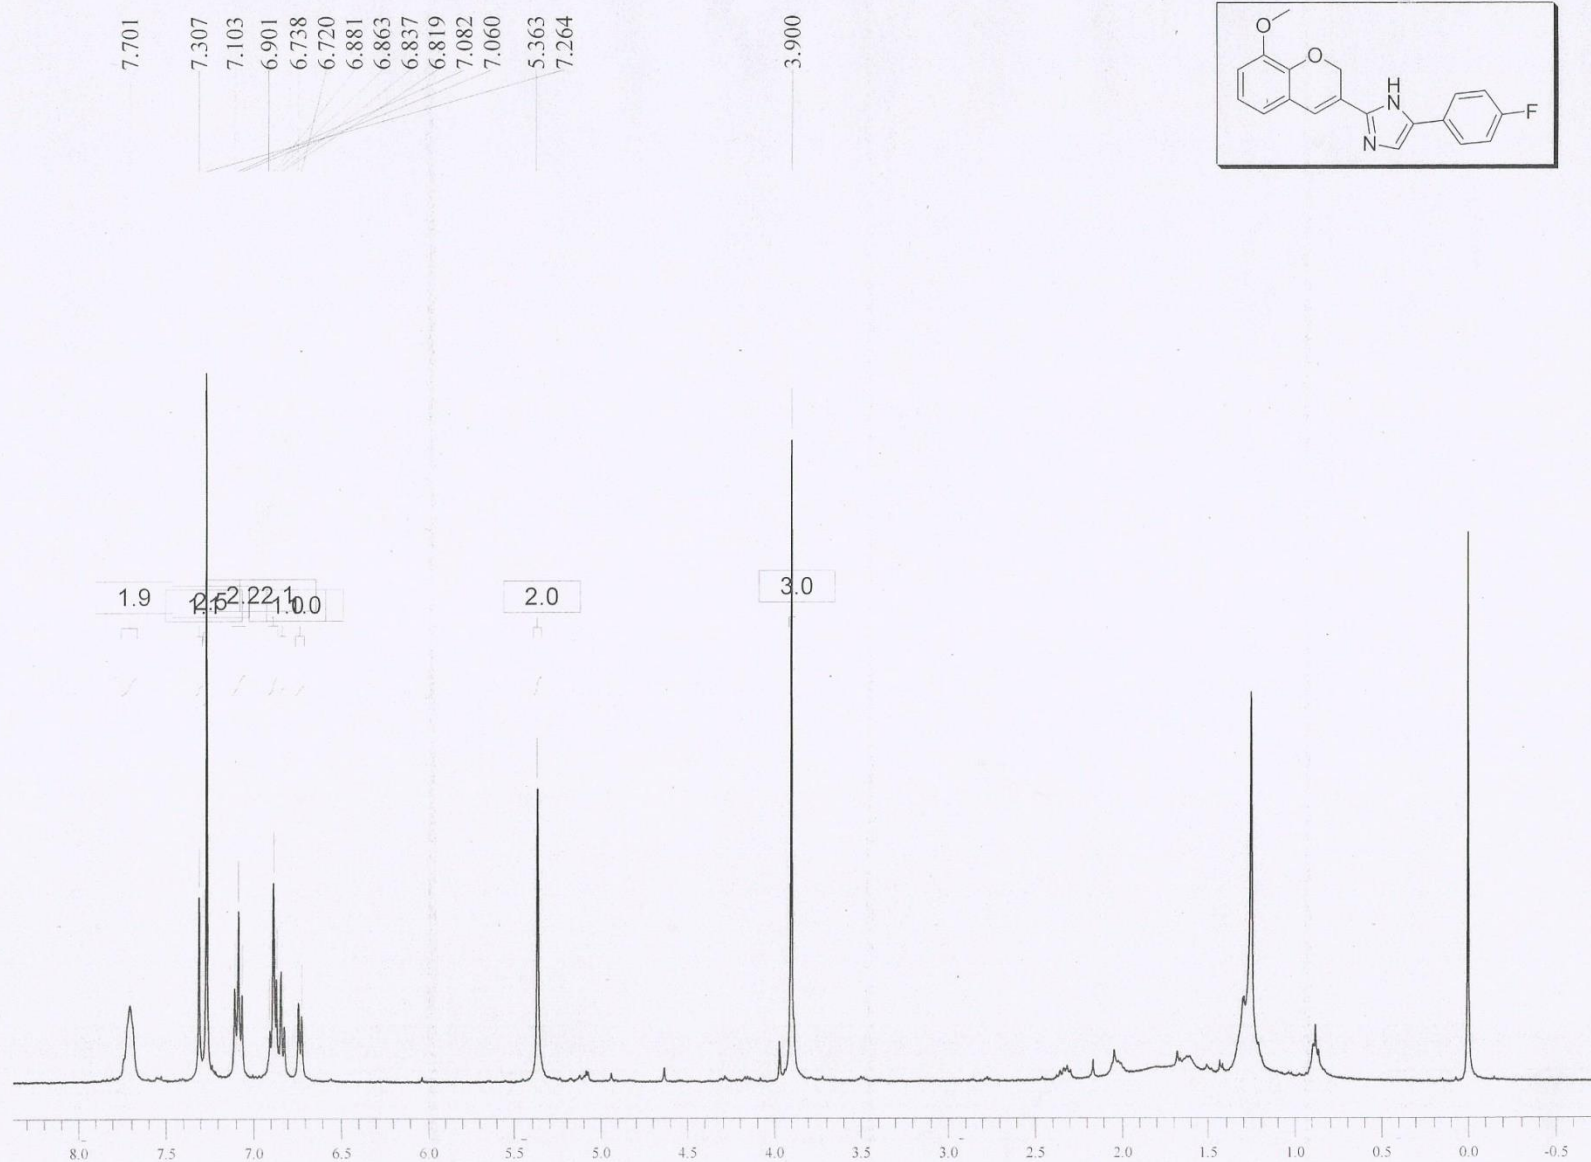

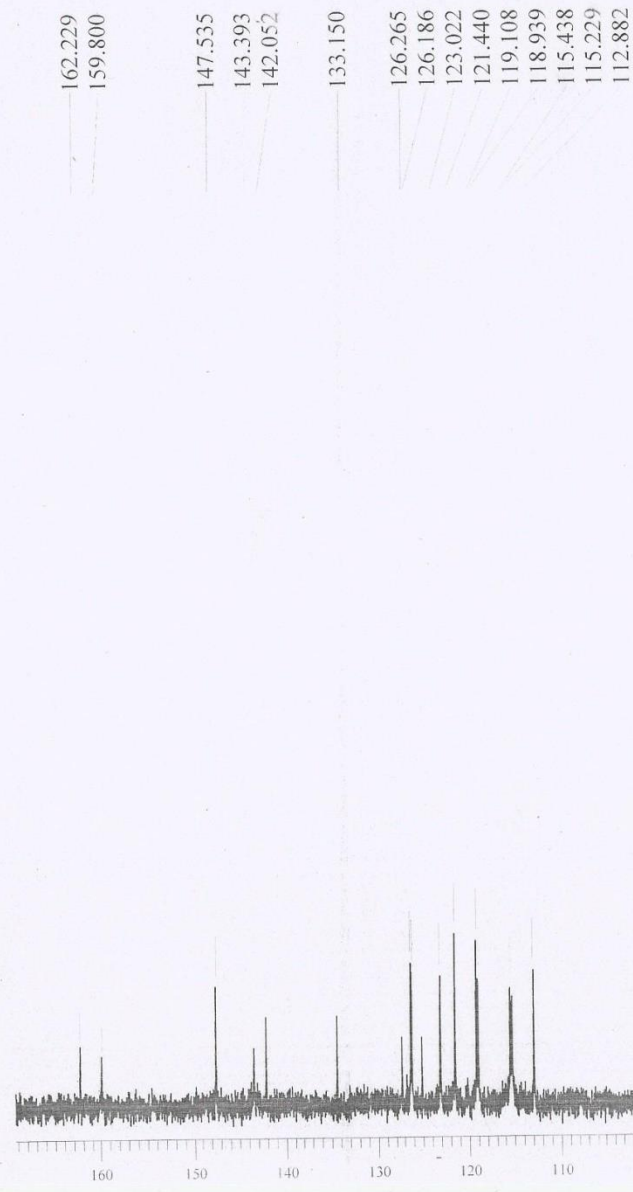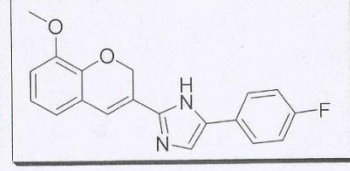

AD/LC-MS/01

Sample Information

Sample Name : EB-8  
Date Acquired : 9/21/2013 10:21:33 AM  
Injection Volume : 10 µl  
Data File : DM210907.lcd  
Method File : ESI METHOD POS.lcm  
Tuning File : E:\Labsolution\Project\Auto Tuning-ESI-080513.lct  
Operator Id : K.Jyothi

MS Spectrum Graph

Base Peak: 323.09/Polarity: Pos

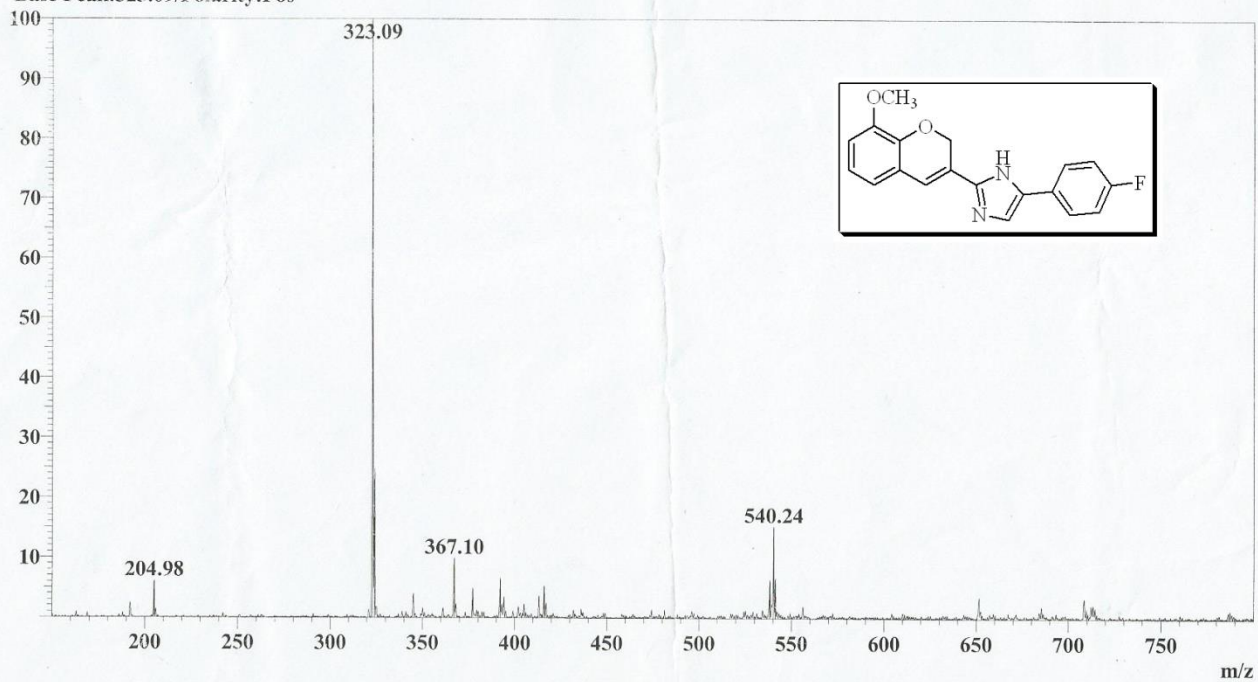

Tested by: K.Jyothi

Checked By: G.S.S.KUMAR

9/24/2013 11:24:33



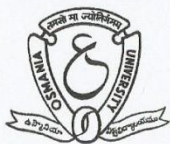

# CENTRAL FACILITIES - OSMANIA UNIVERSITY

## FTIR ANALYSIS REPORT

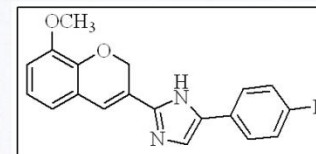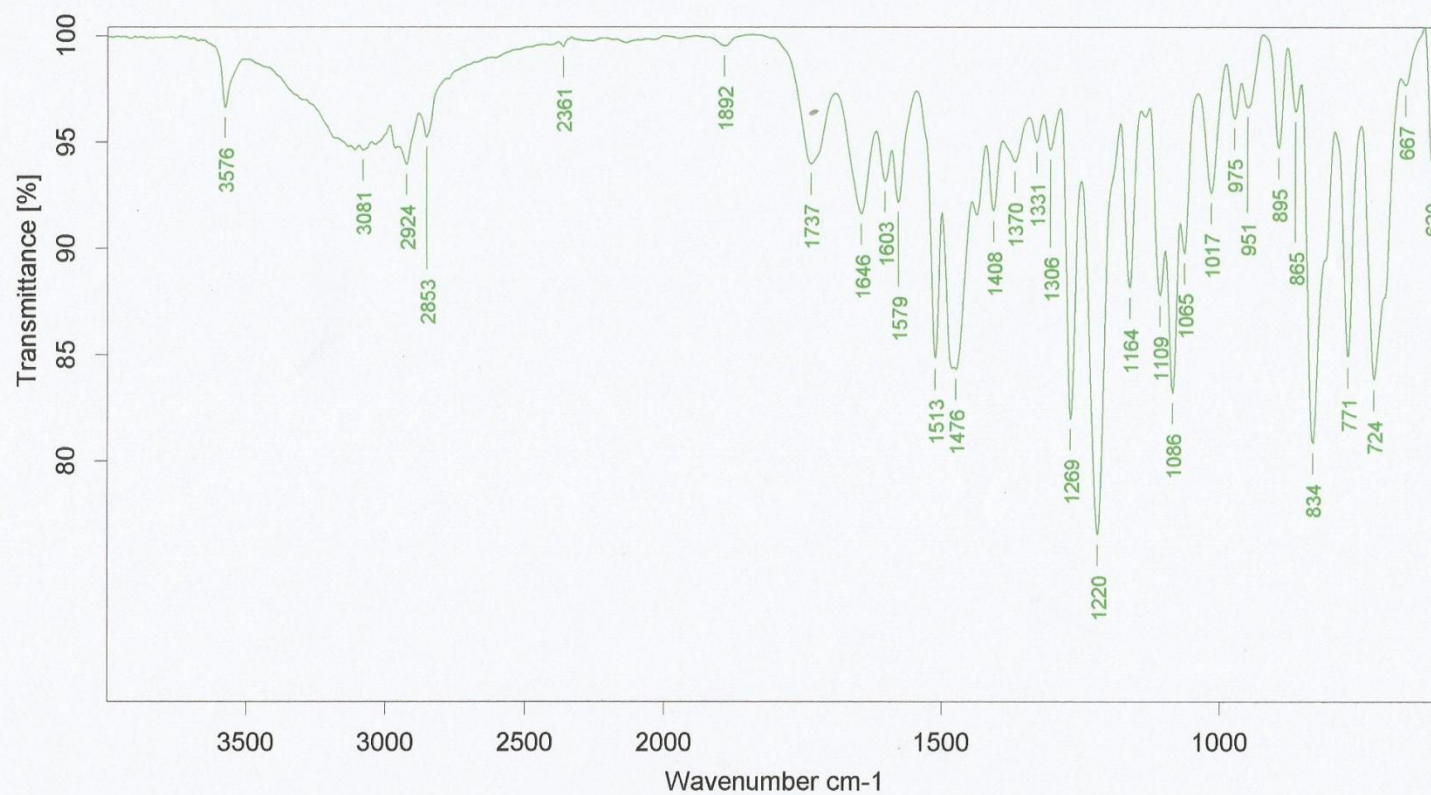

Sample Name: 1302-1052 26 8CR- 5 Sample Form:ATR 28/02/2013 11:27:58 AM



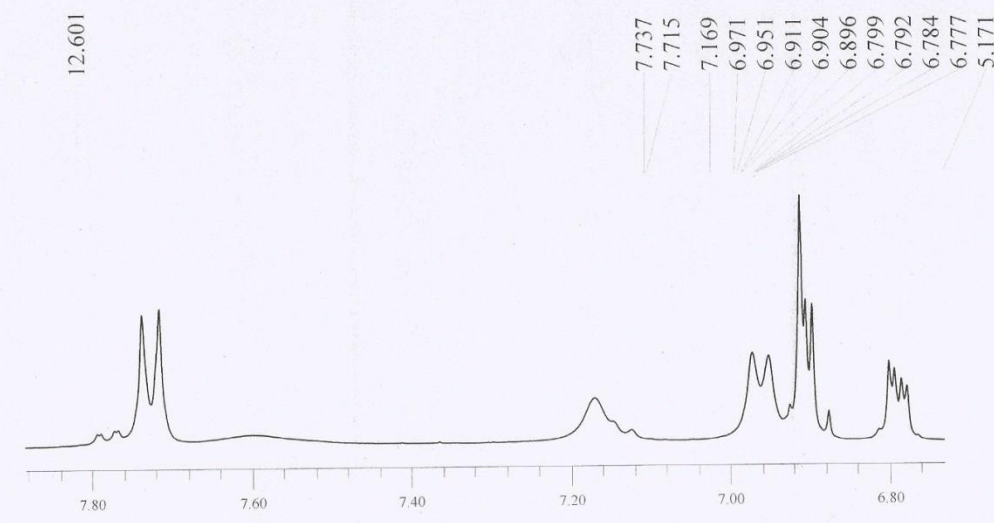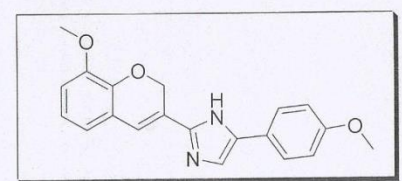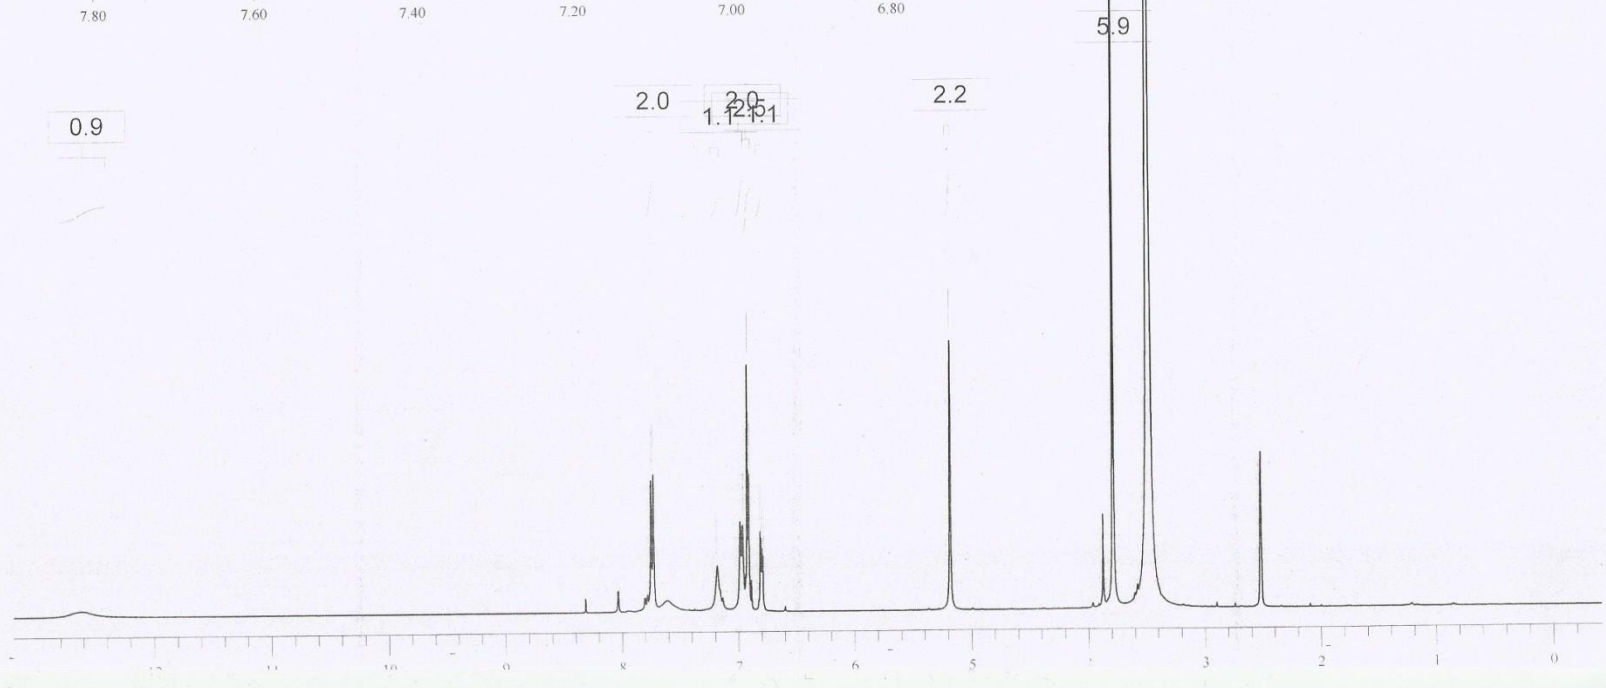

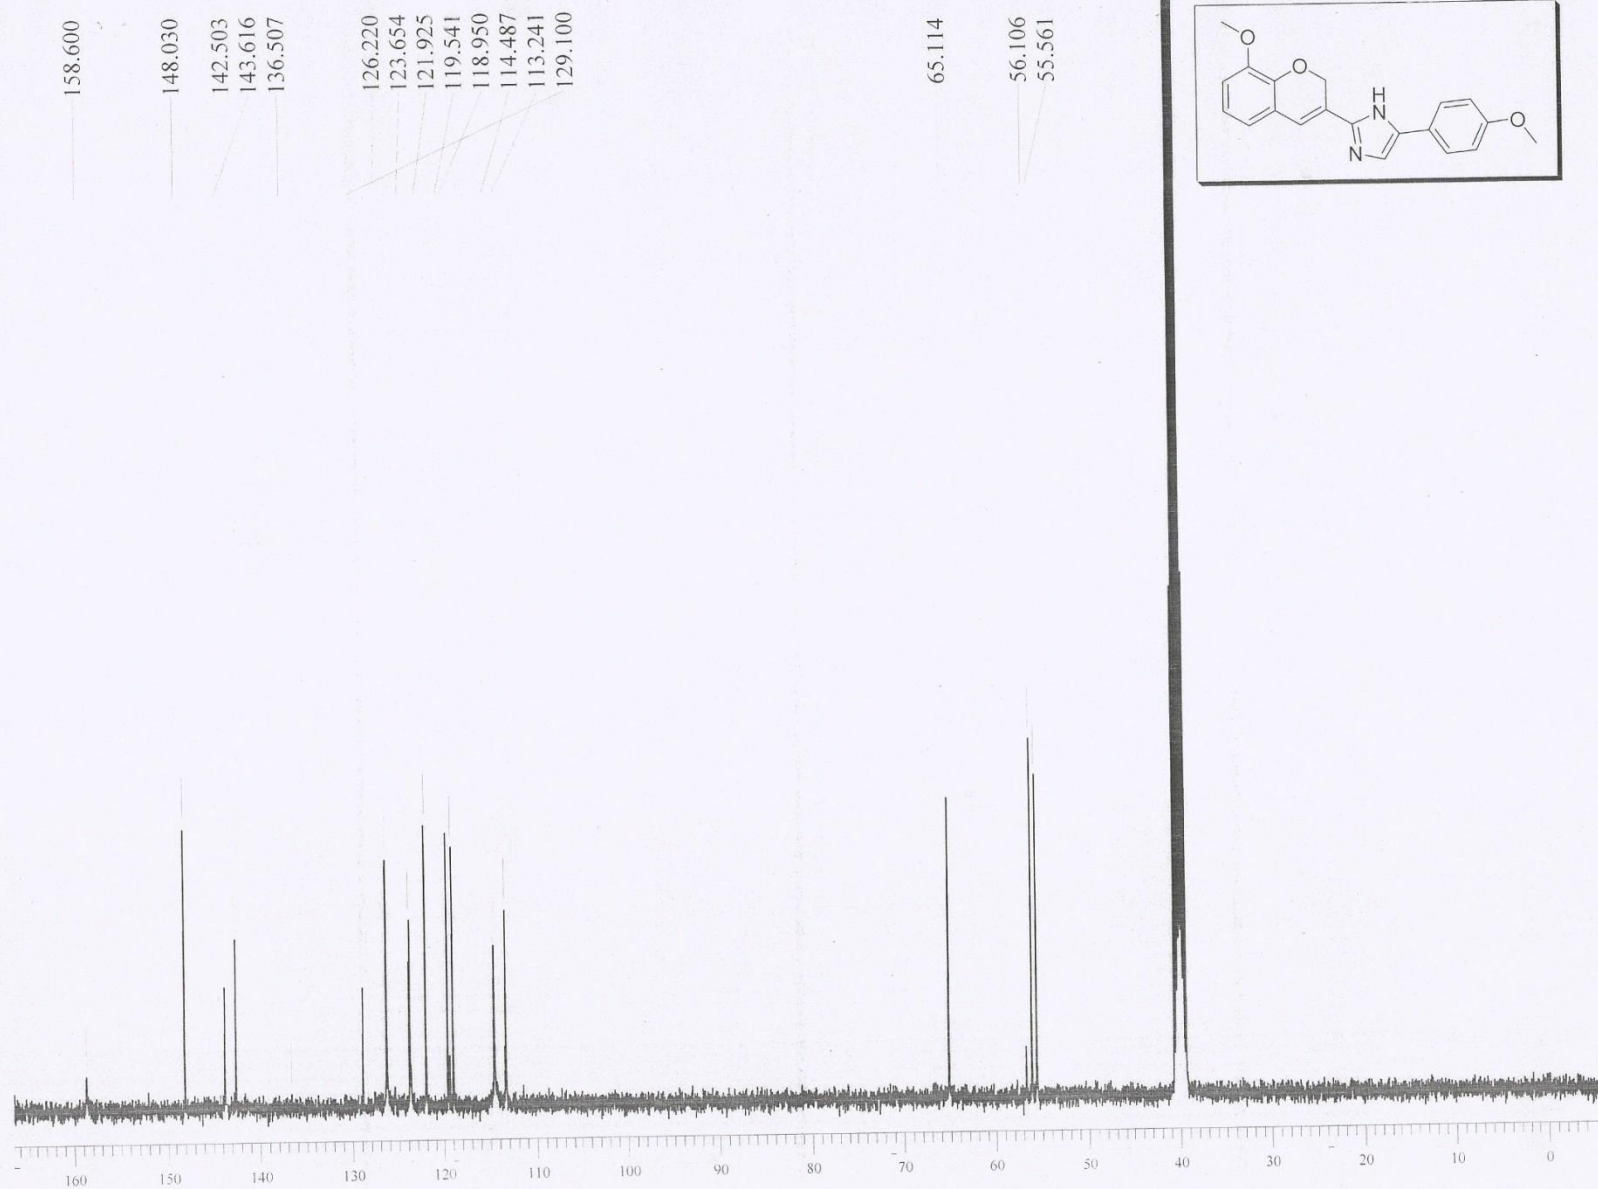

29042013-012 4 (0.337) Cm (3:11-13:22)

5: Scan ES+  
1.82e7

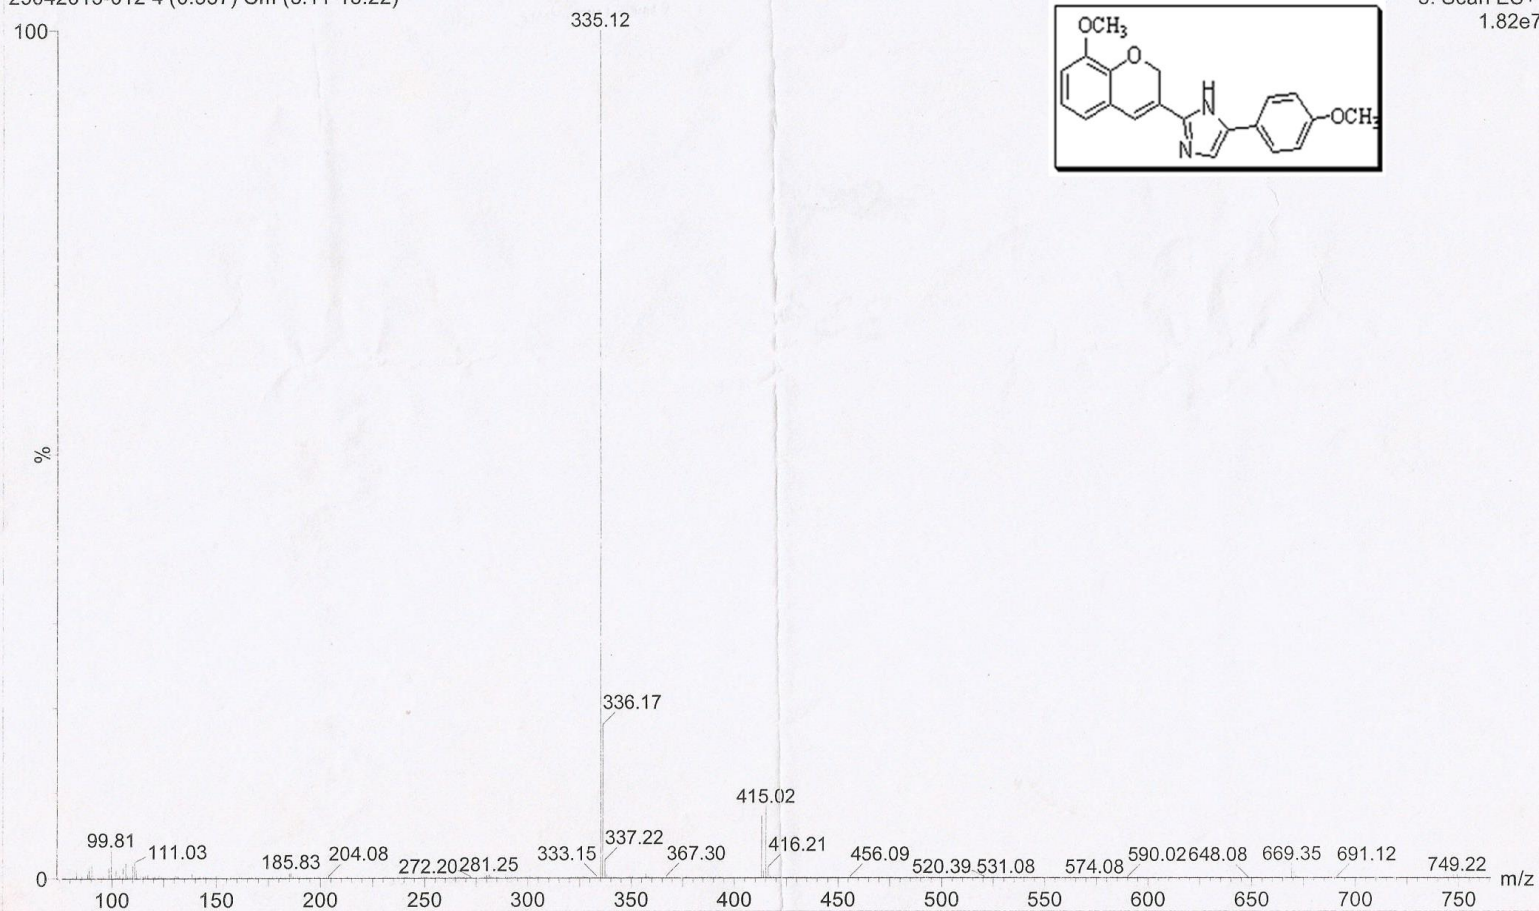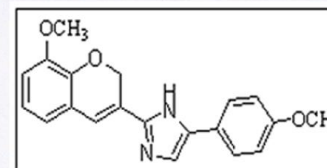



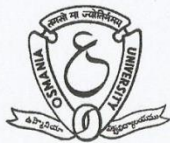

# CENTRAL FACILITIES - OSMANIA UNIVERSITY

## FTIR ANALYSIS REPORT

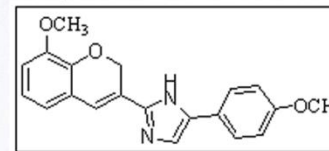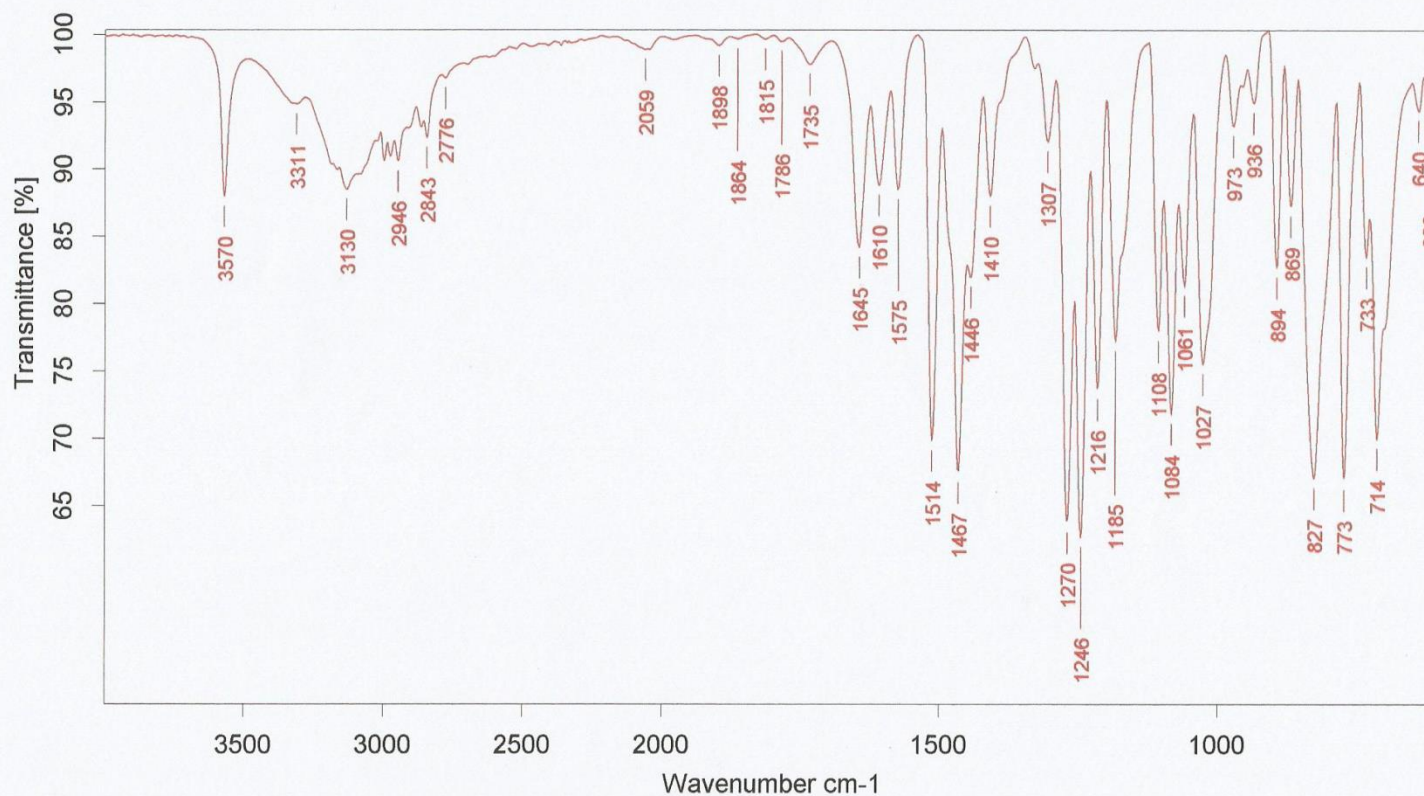

Sample Name: 1302-1052 24 8CR- 3 Sample Form:ATR 28/02/2013 11:19:41 AM



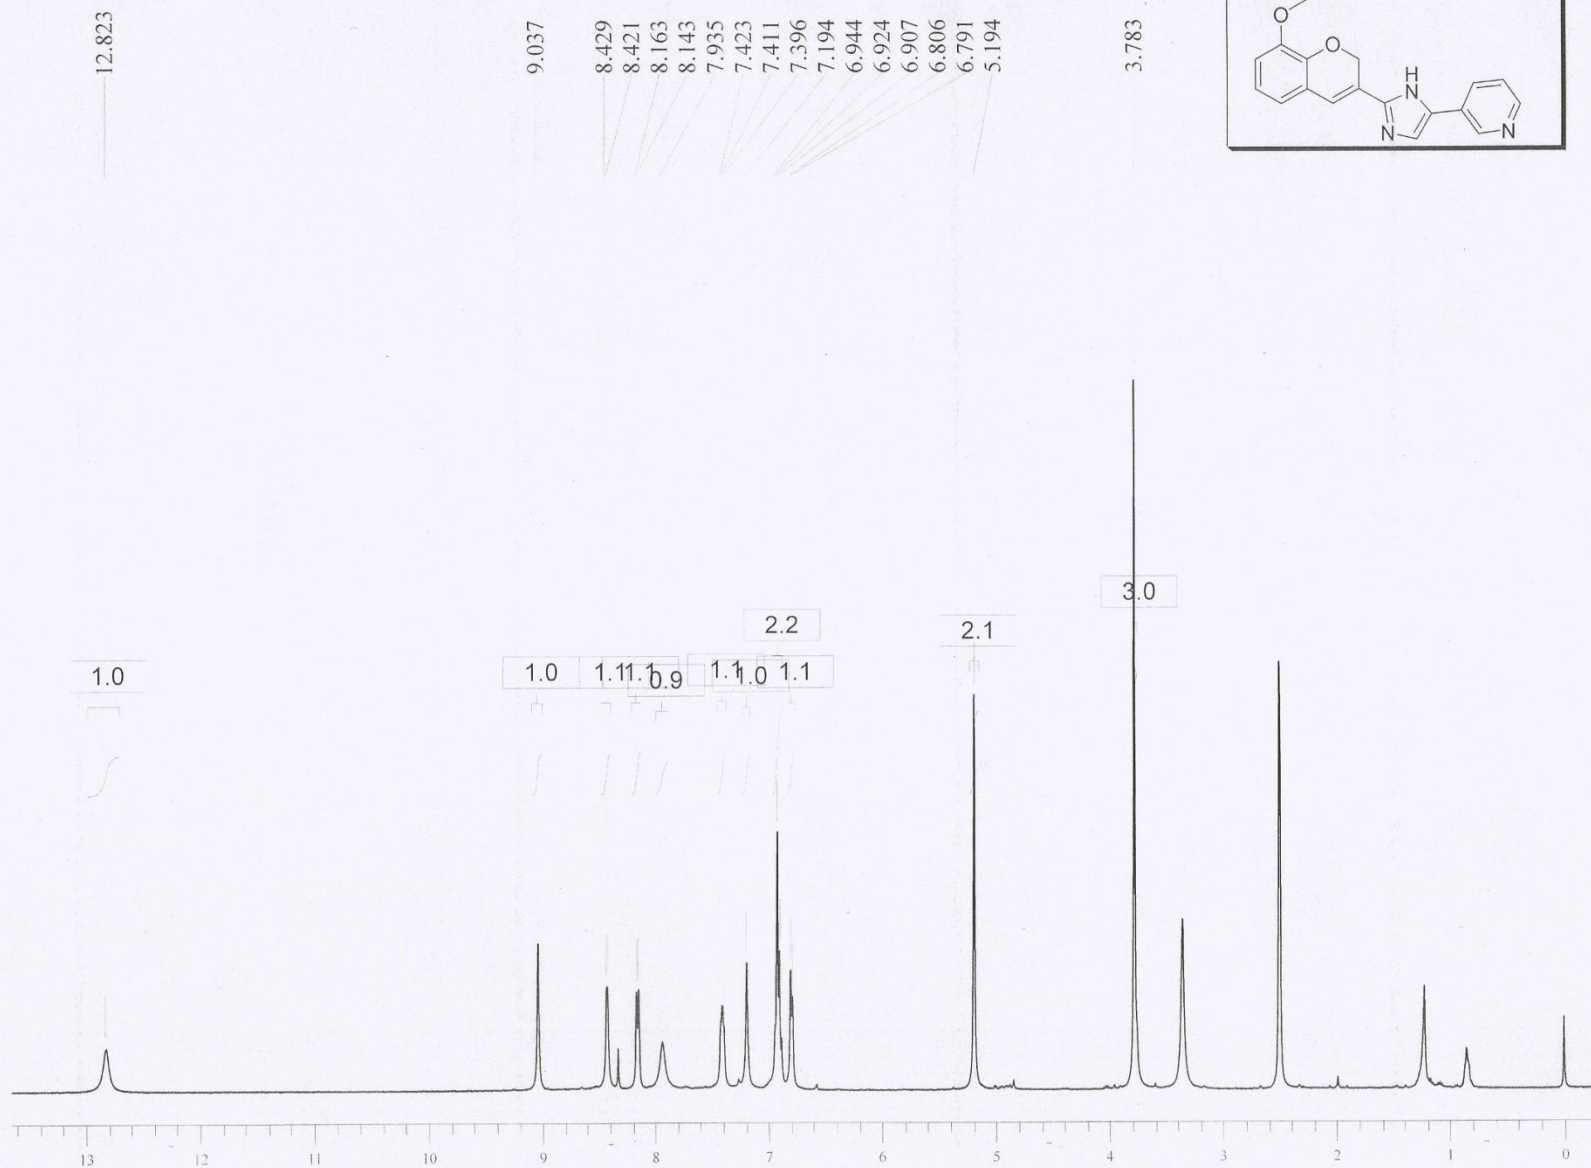

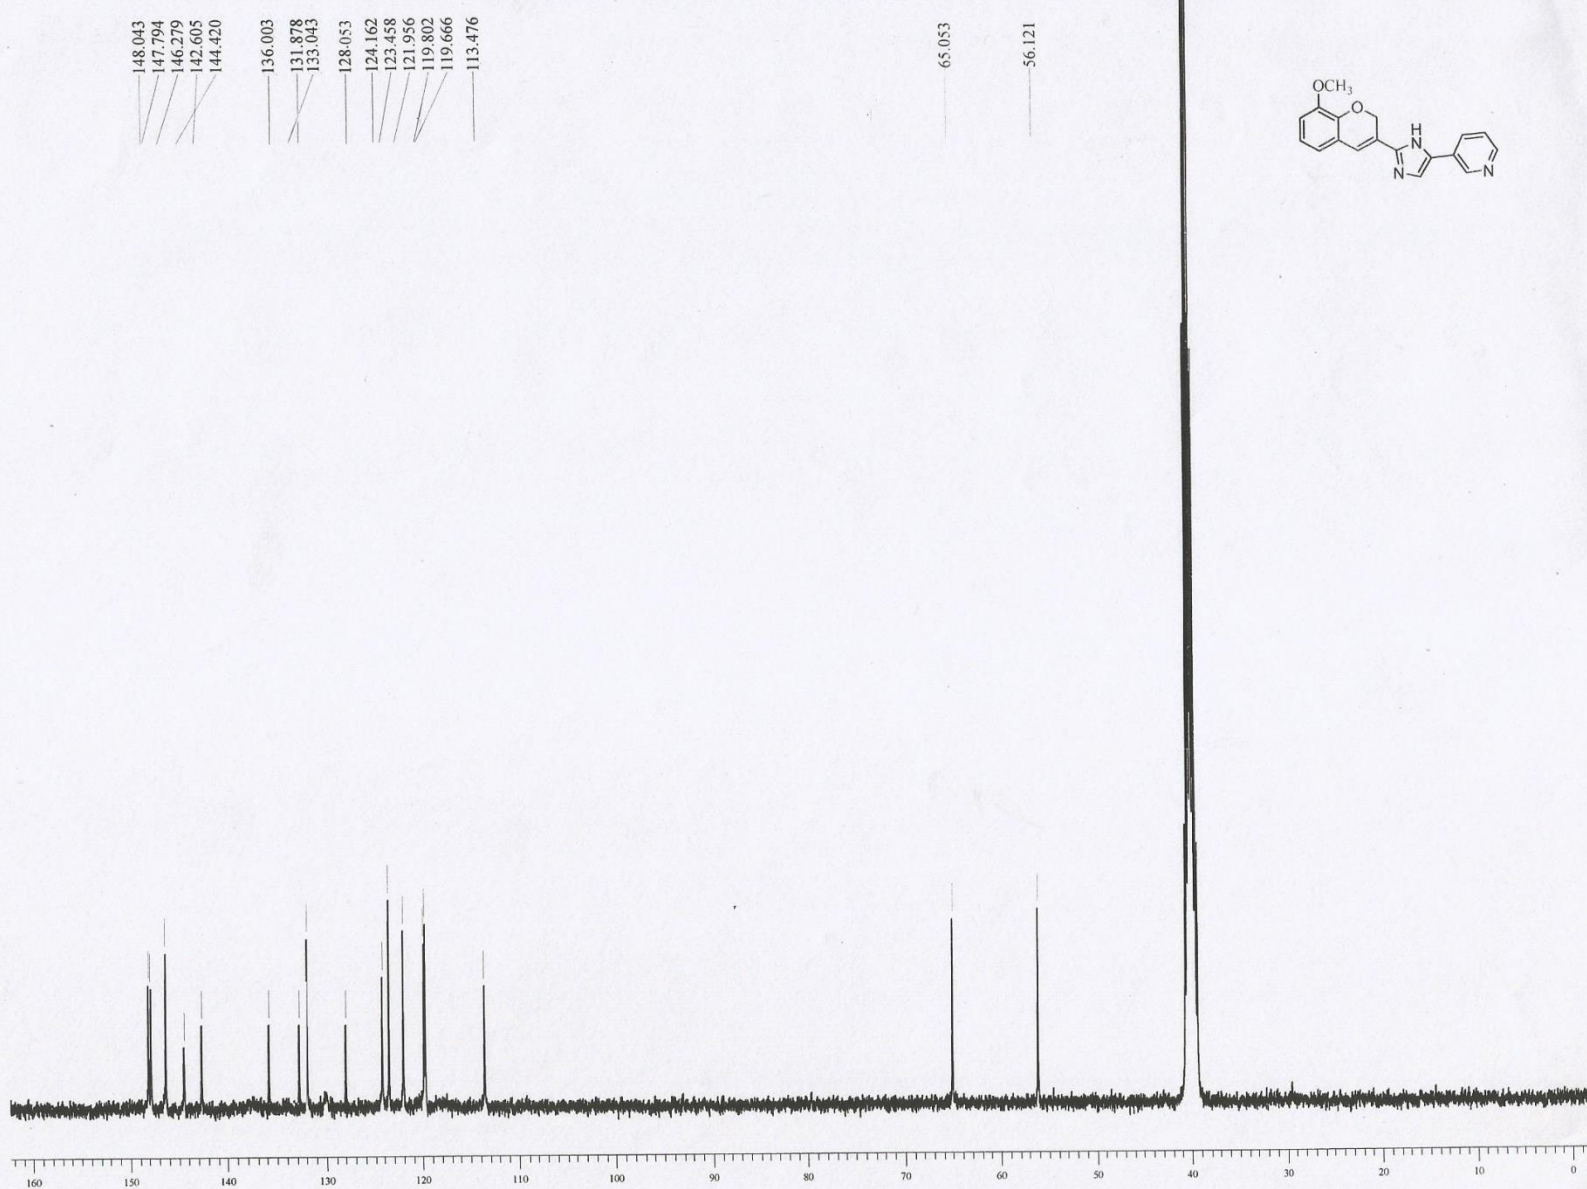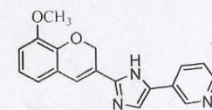

AD/LC-MS/01

Sample Information

Sample Name : EB-7  
Date Acquired : 9/21/2013 10:19:57 AM  
Injection Volume : 10µl  
Data File : DM210906.lcd  
Method File : ESI METHOD POS.lcm  
Tuning File : E:\Labsolution\Project\Auto Tuning-ESI-080513.lct  
Operator Id : K.Jyothi

MS Spectrum Graph

Base Peak:306.12/Polarity:Pos

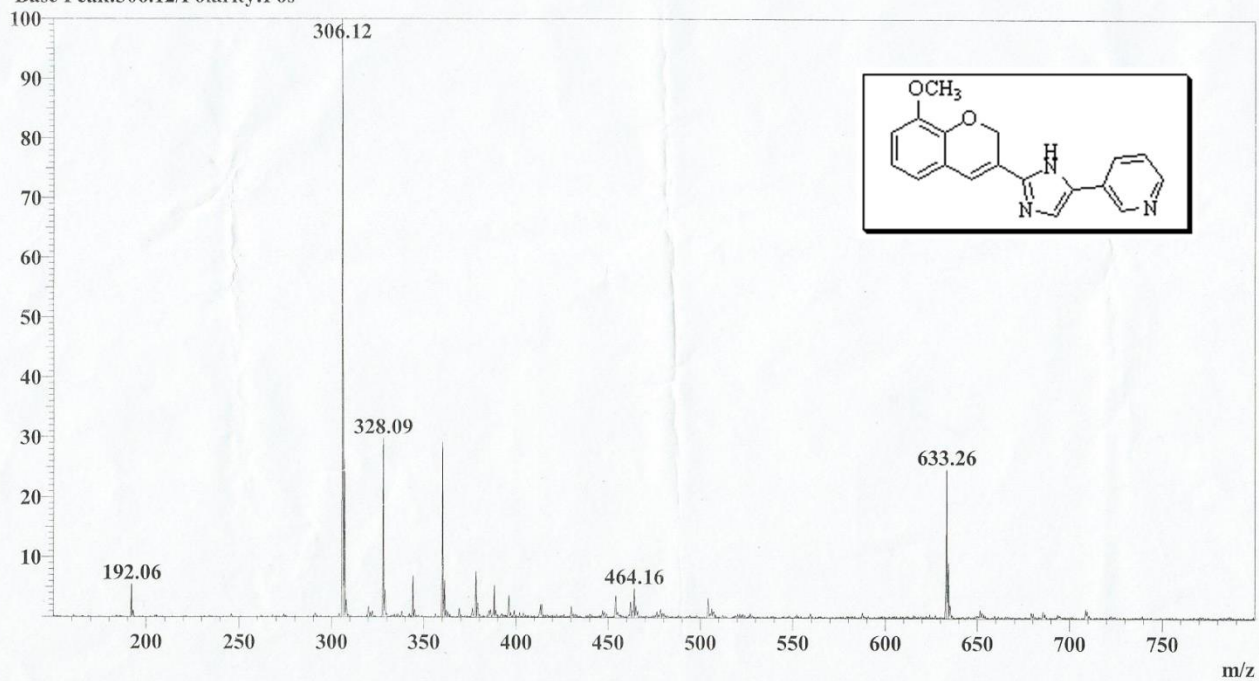

Tested by: K.Jyothi

Checked By: G.S.S.KUMAR

9/21/2013 11:10:01



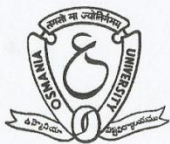

# CENTRAL FACILITIES - OSMANIA UNIVERSITY

## FTIR ANALYSIS REPORT

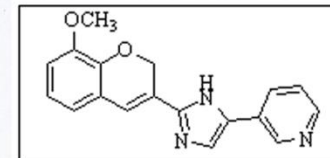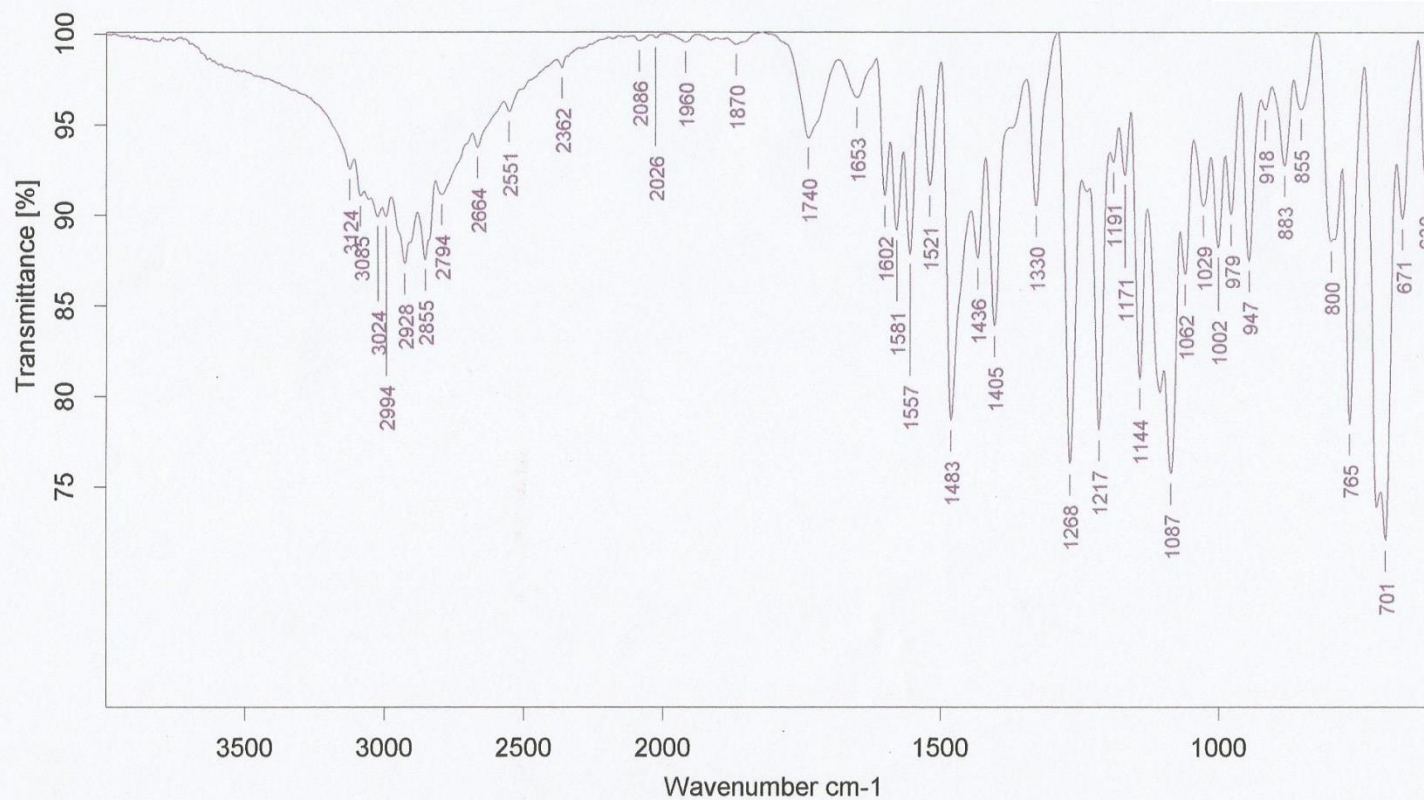

Sample Name: 1302-1052 33 8CR- 12 Sample Form:ATR 28/02/2013 11:53:21 AM



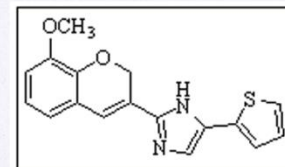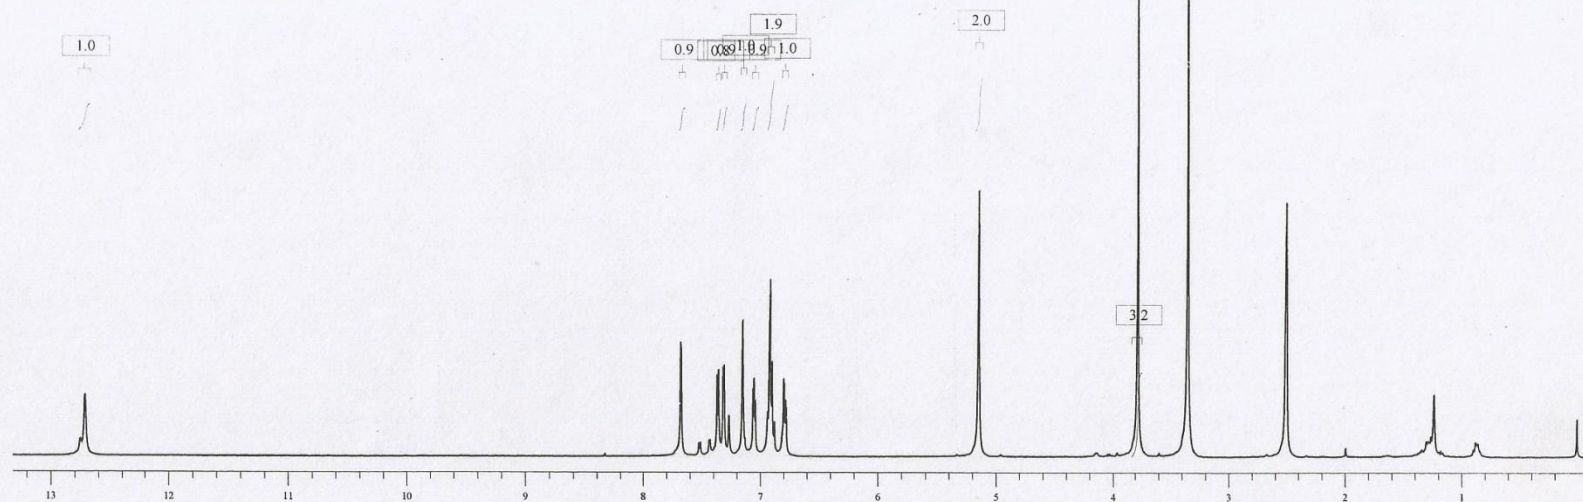

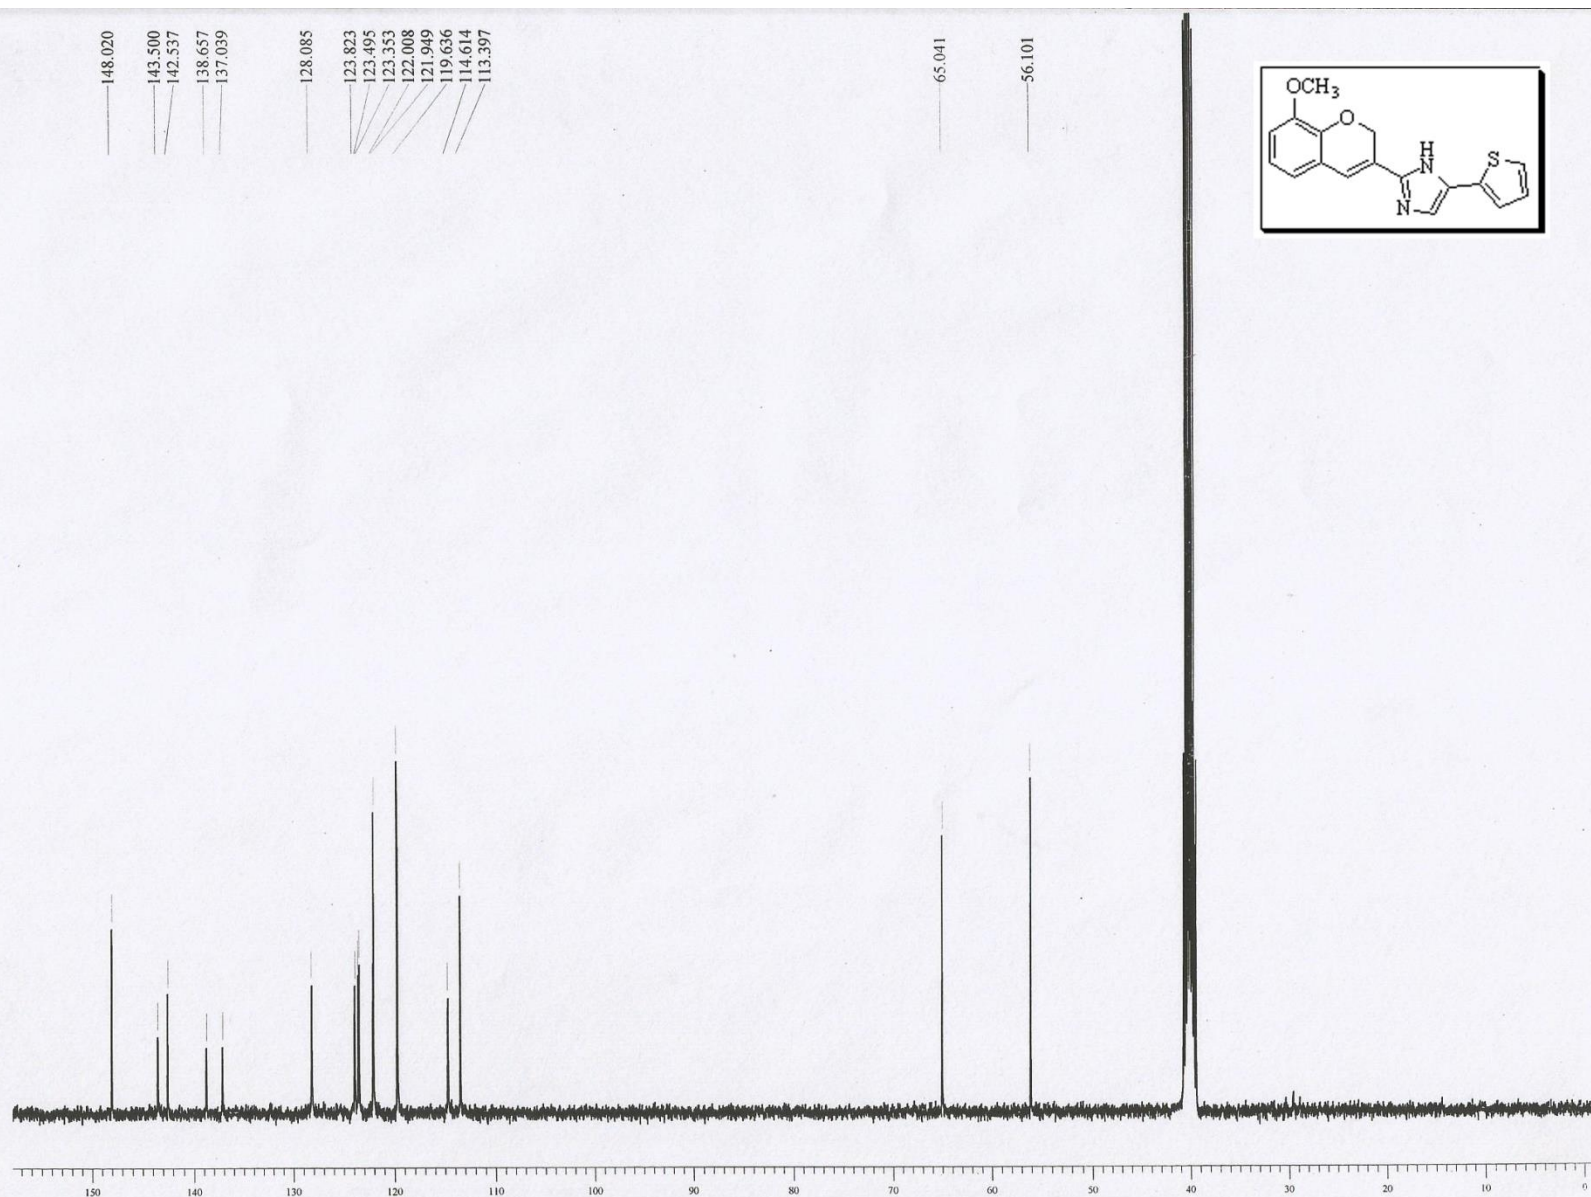

28052013-041 4 (0.337) Cm (3:6-(7:15+1:2))

5: Scan ES+  
6.45e7

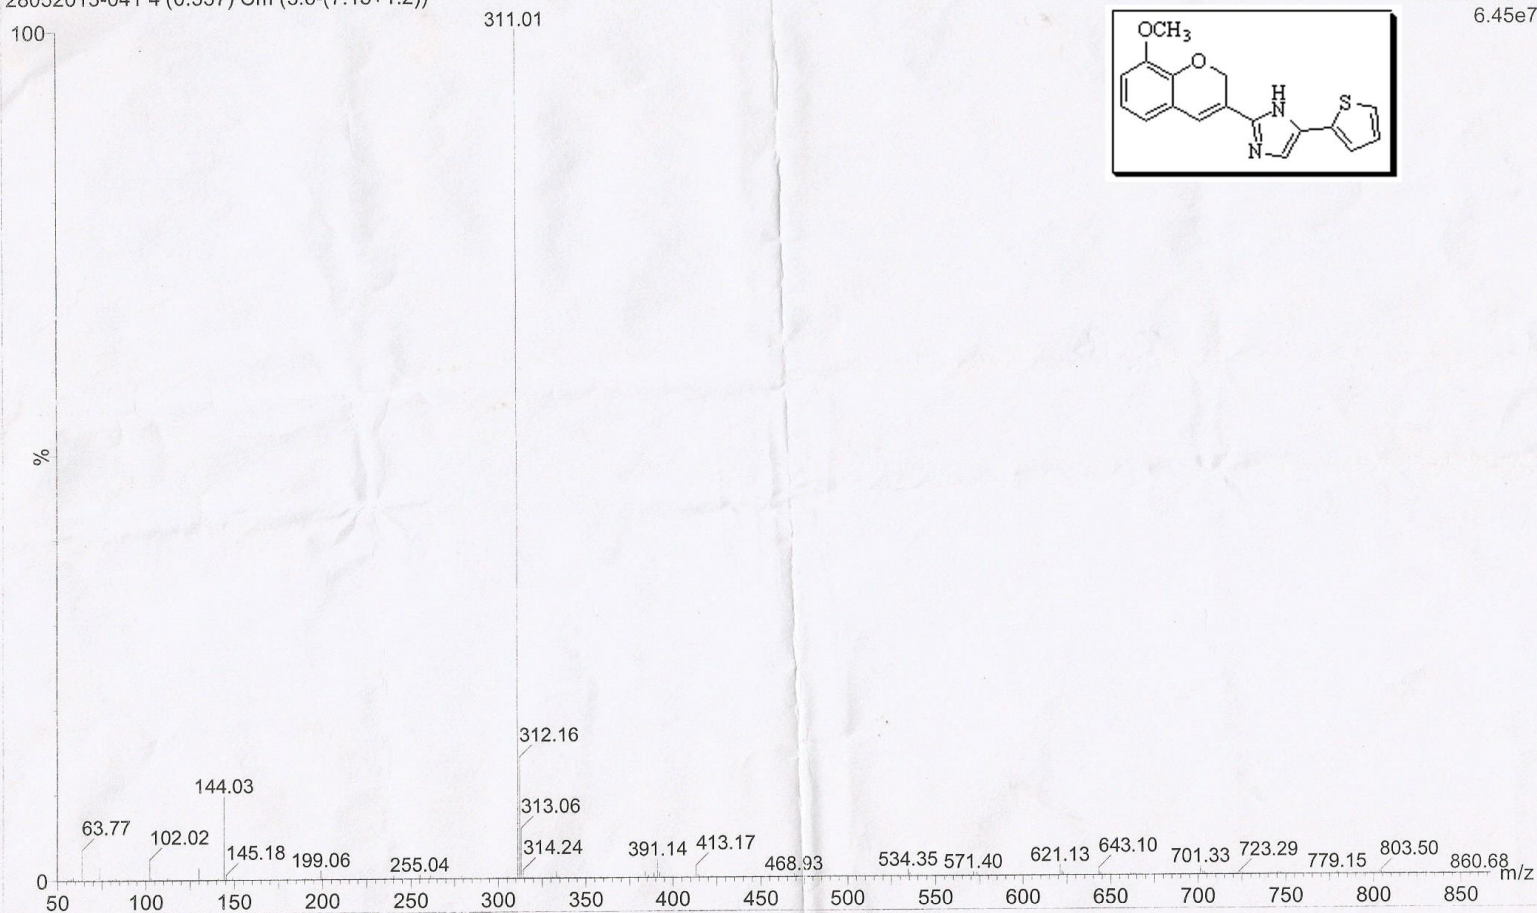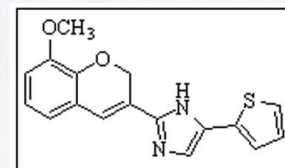



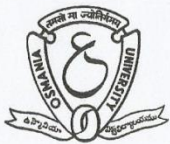

CENTRAL FACILITIES - OSMANIA UNIVERSITY

FTIR ANALYSIS REPORT

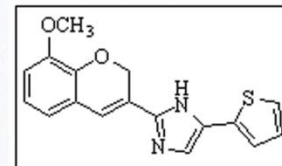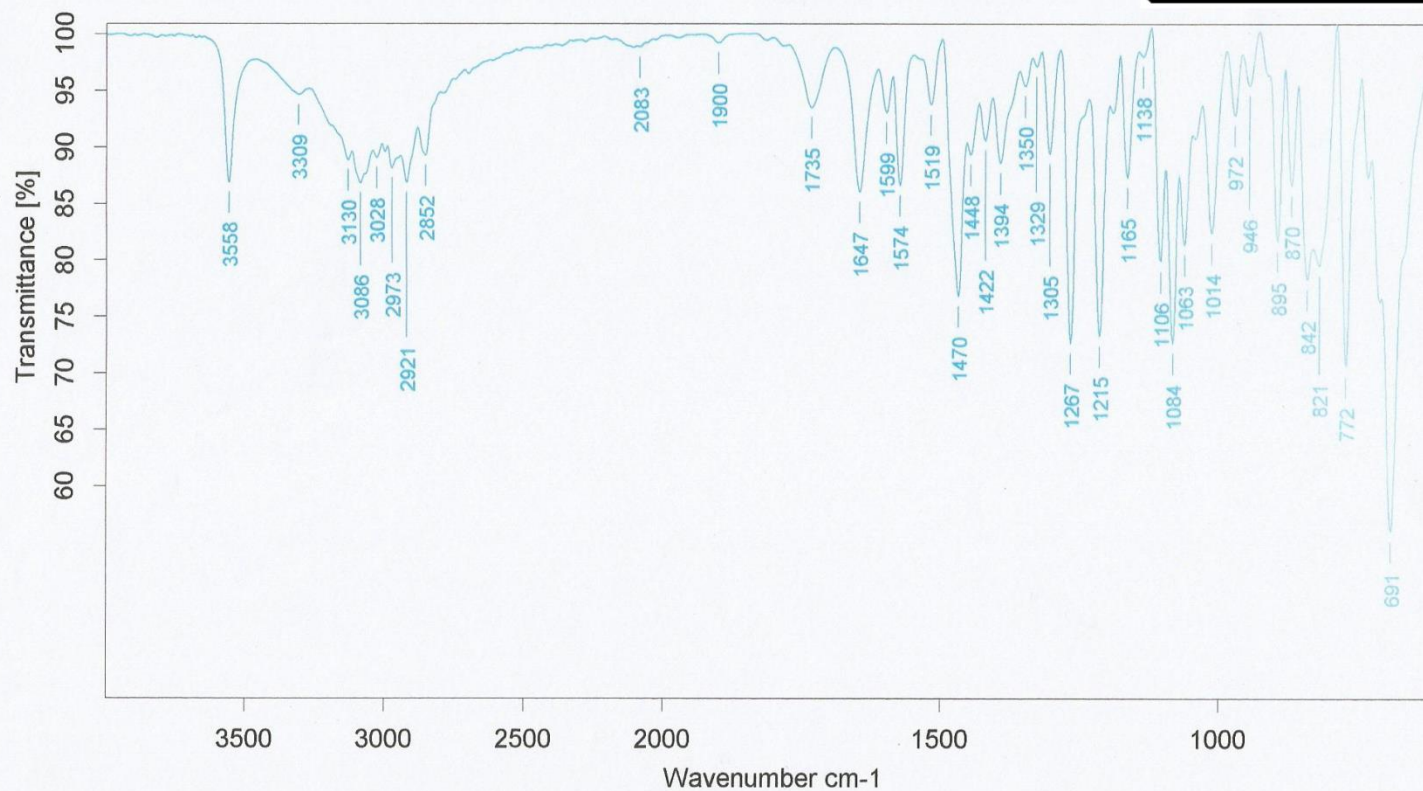

Sample Name: 1302-1052 27 8CR-6 Sample Form:ATR 28/02/2013 11:30:55 AM



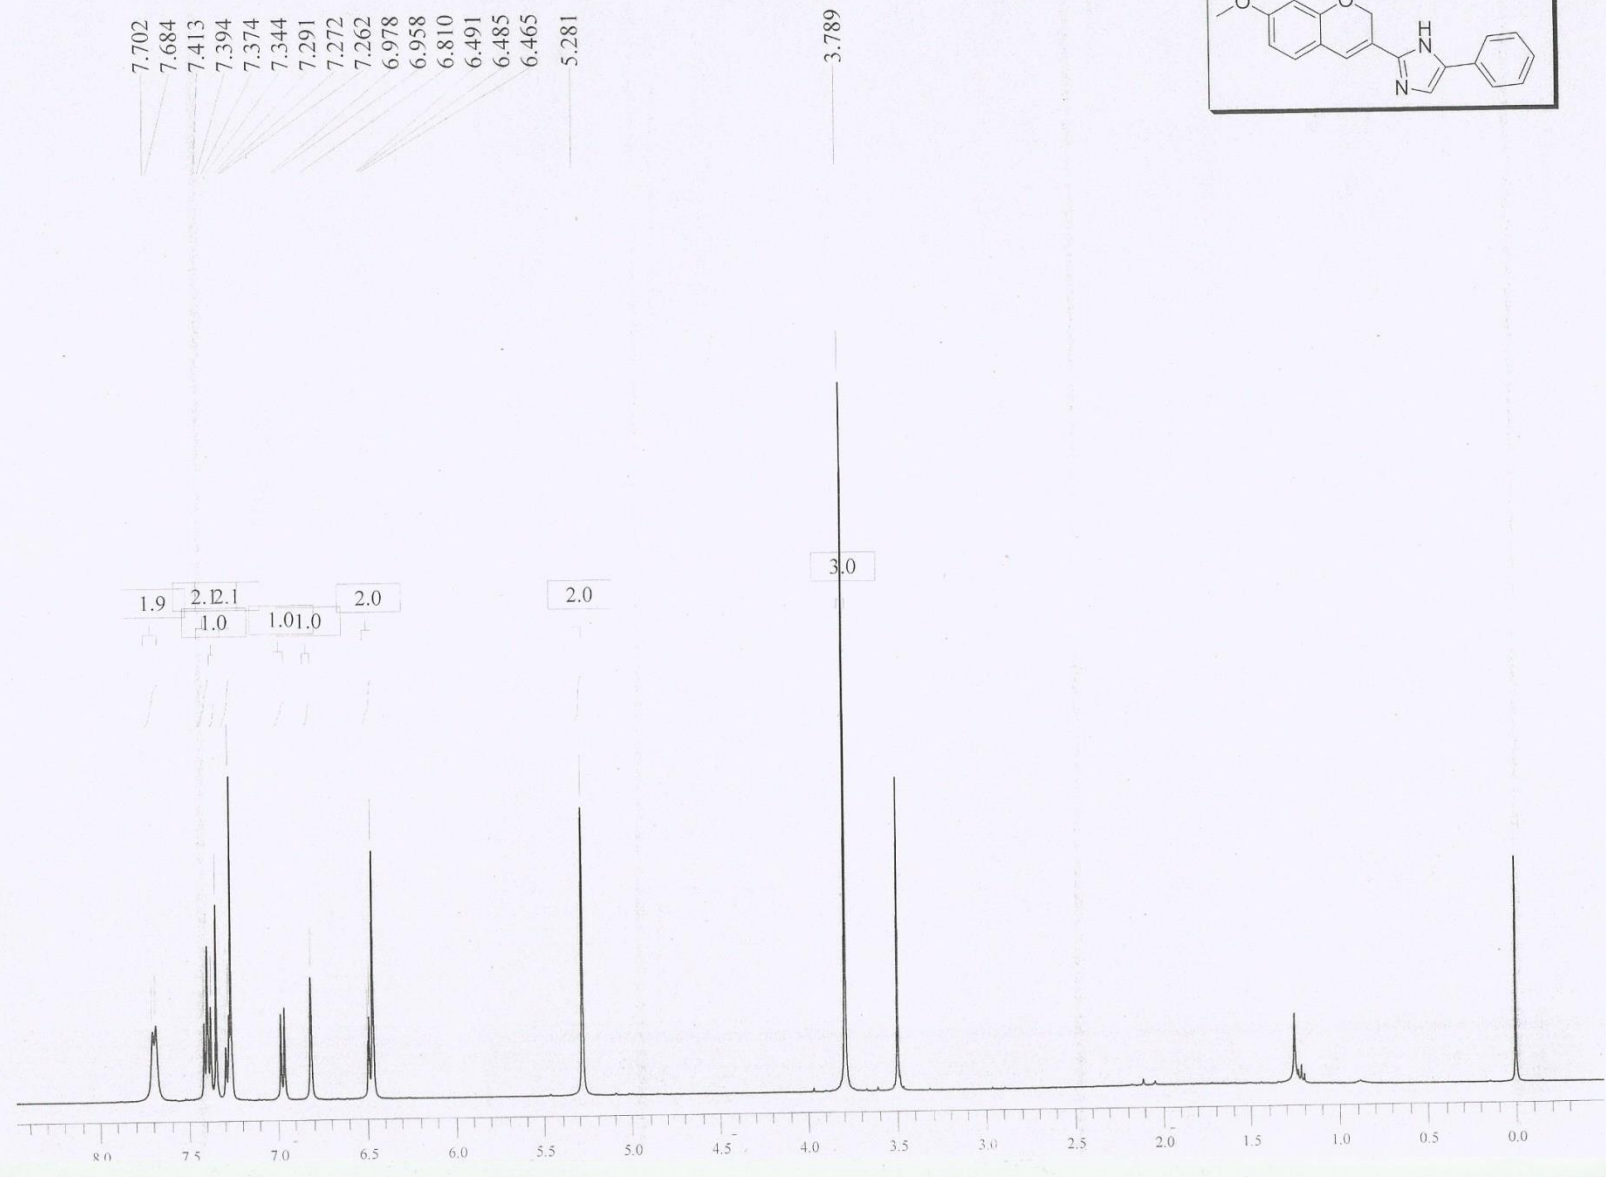

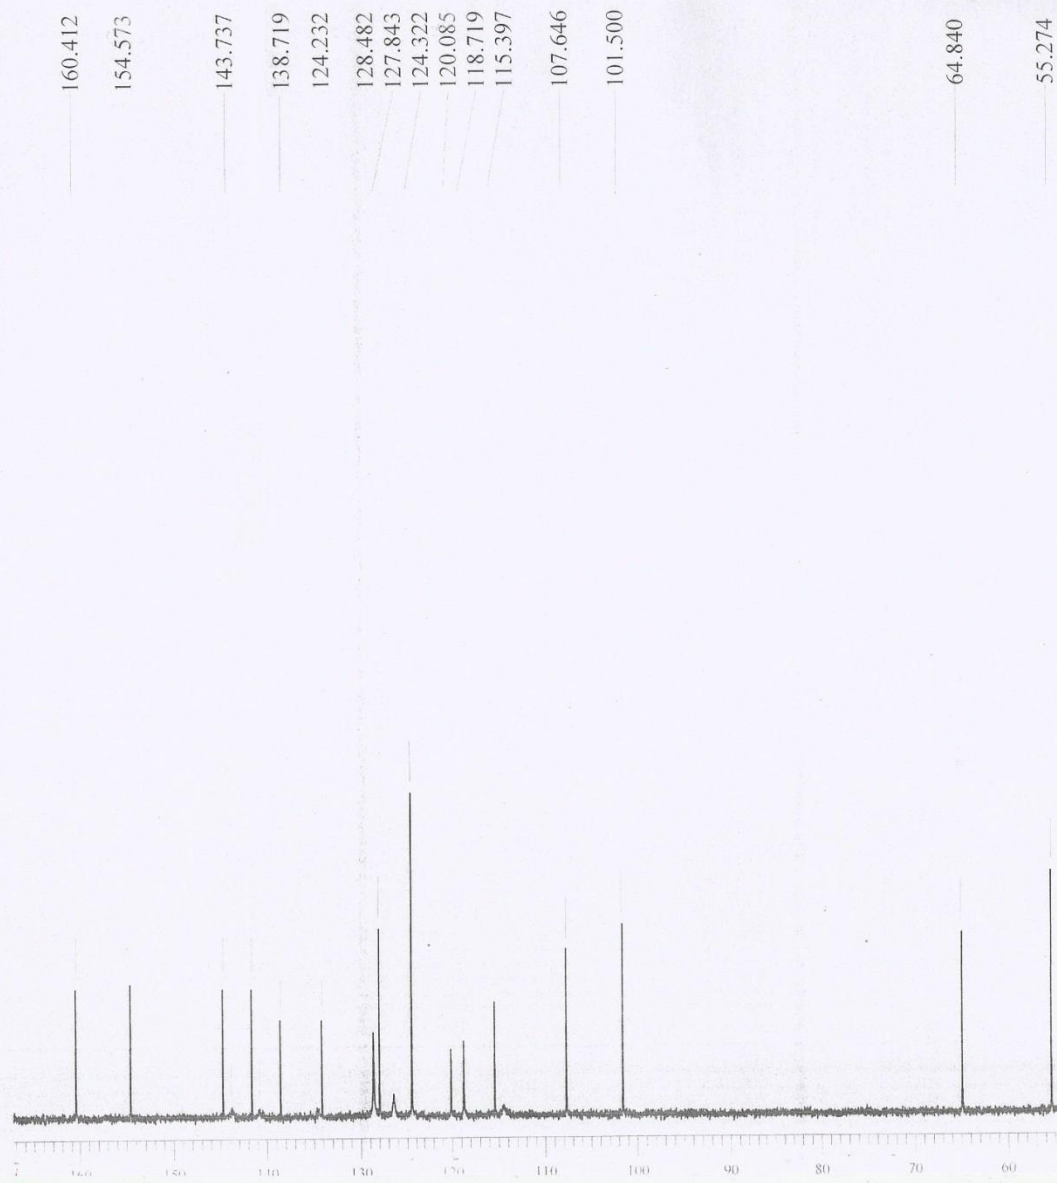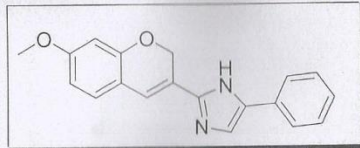

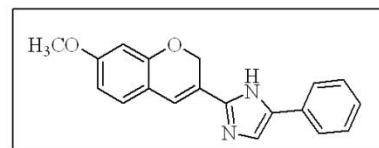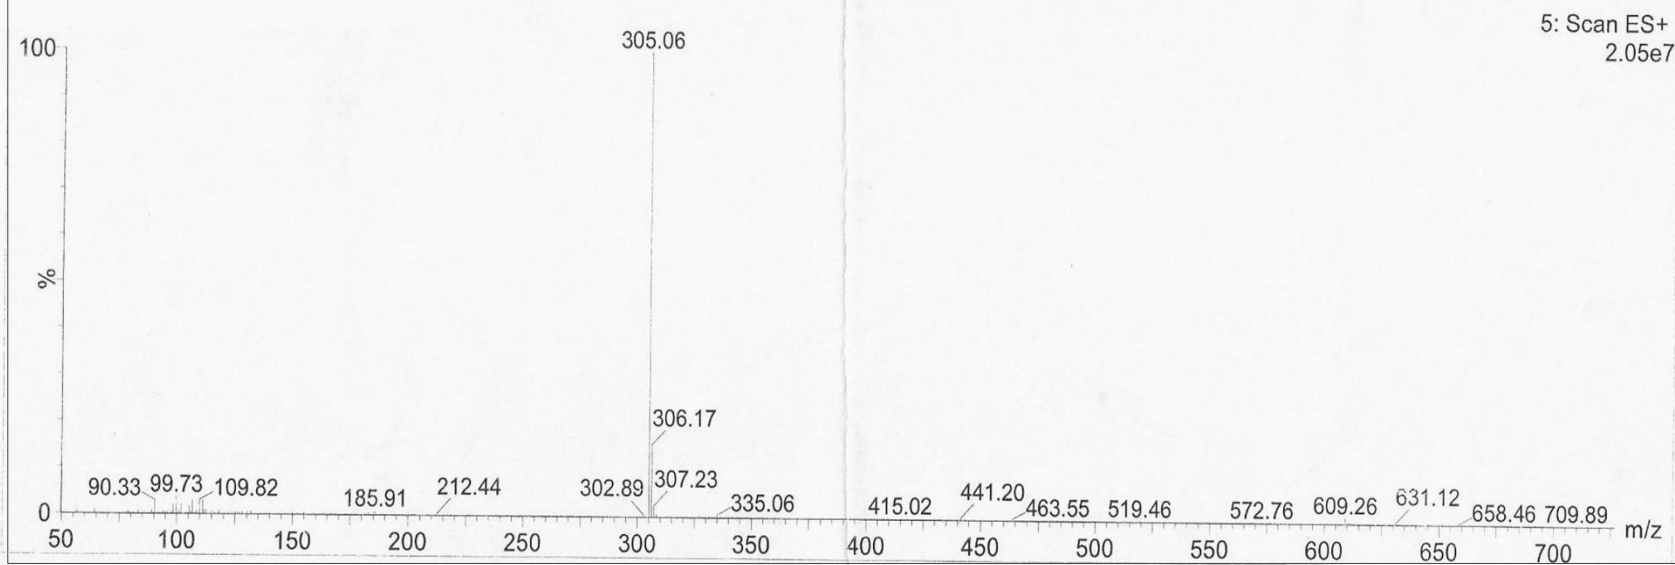

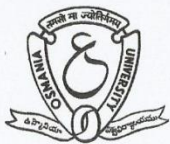

CENTRAL FACILITIES - OSMANIA UNIVERSITY

FTIR ANALYSIS REPORT

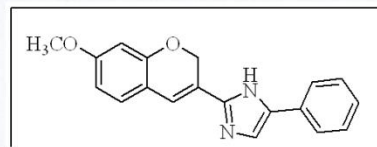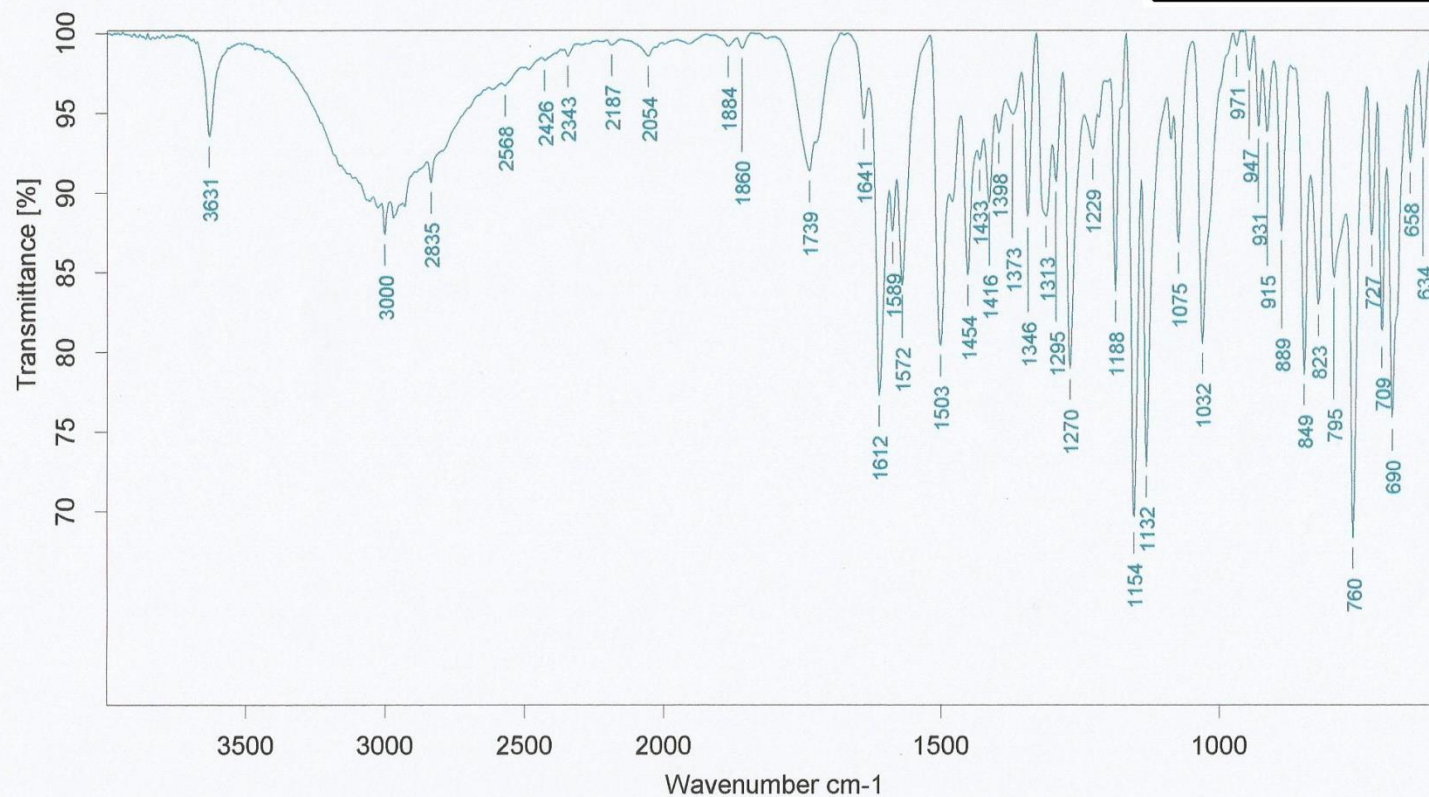

Sample Name: 1302-1052 7 7CR-1

Sample Form:ATR

22/02/2013

2:56:58 PM



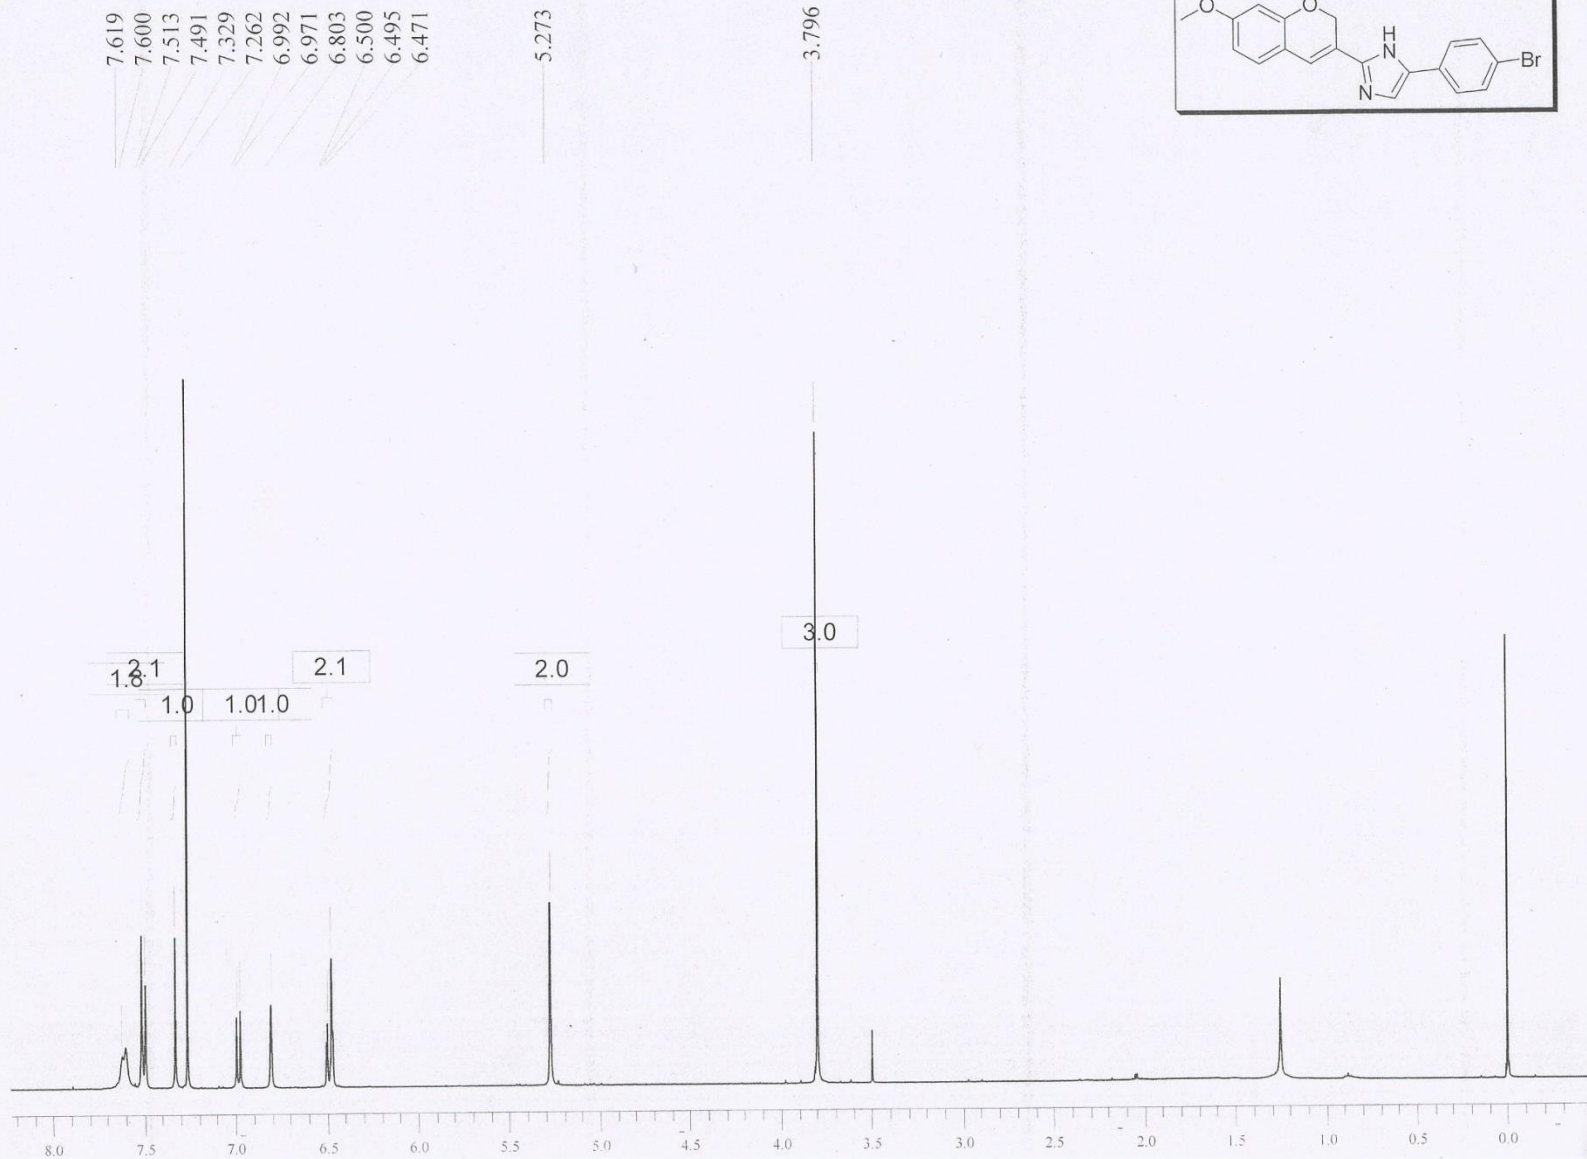

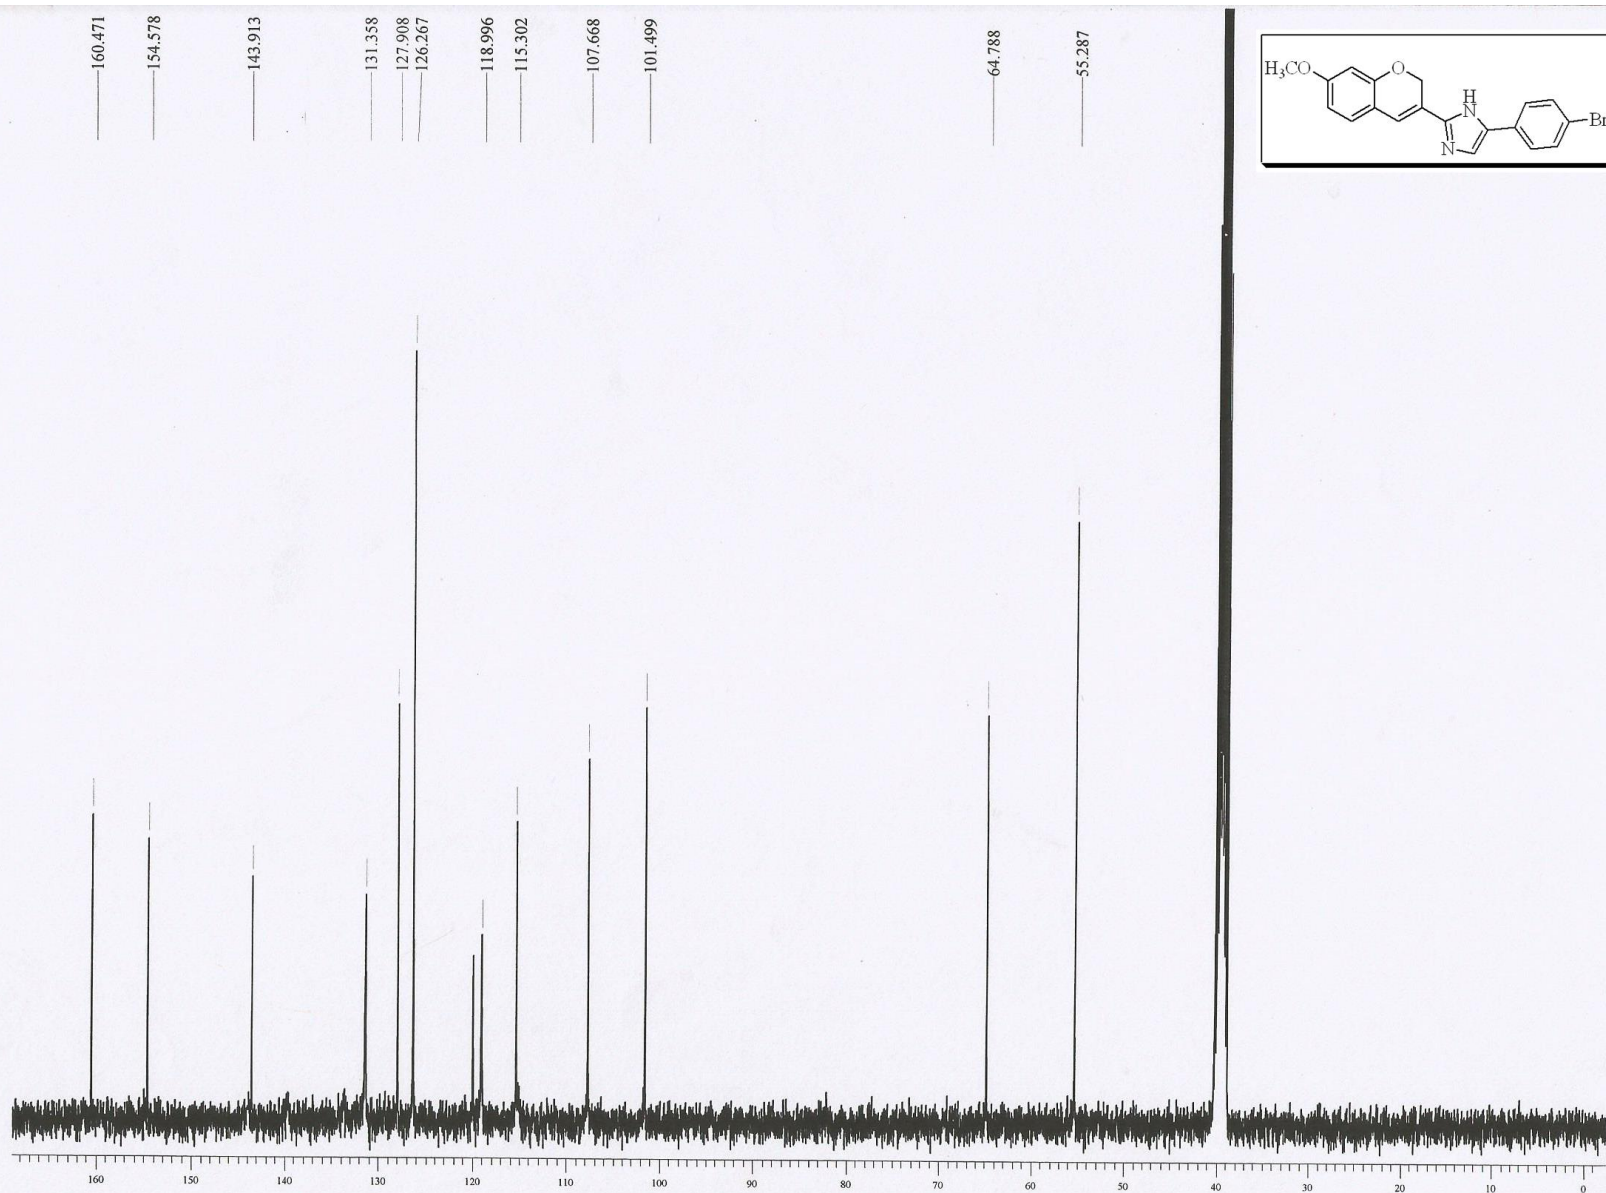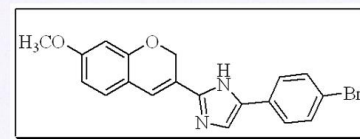

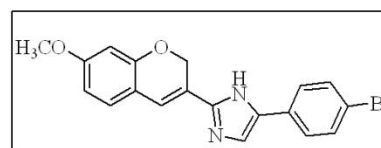

Scan ES+  
2.04e7

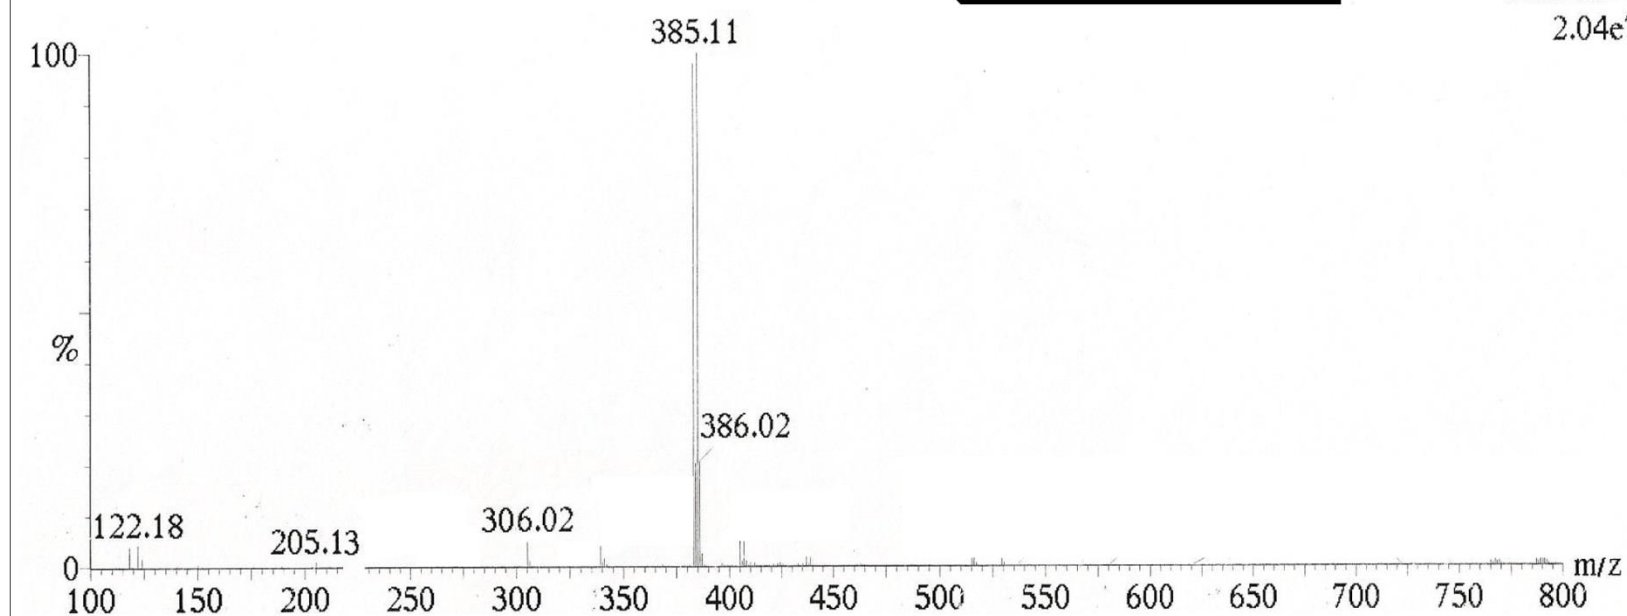

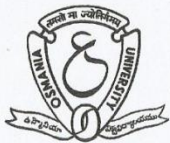

CENTRAL FACILITIES - OSMANIA UNIVERSITY

FTIR ANALYSIS REPORT

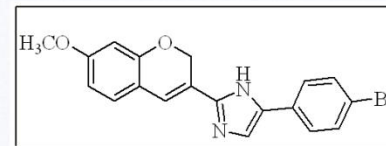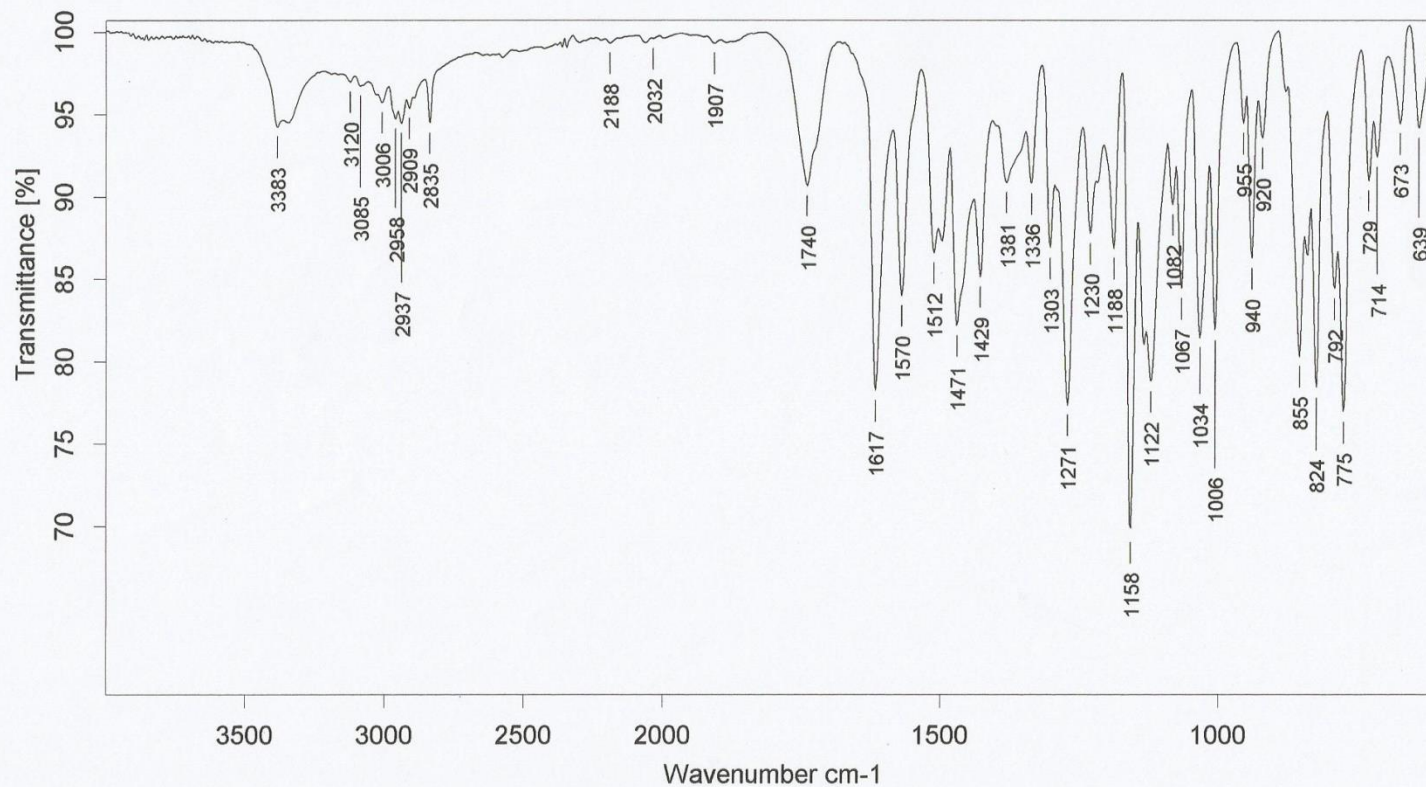

Sample Name: 1302-1052 8 7CR-2

Sample Form:ATR

22/02/2013

3:00:01 PM



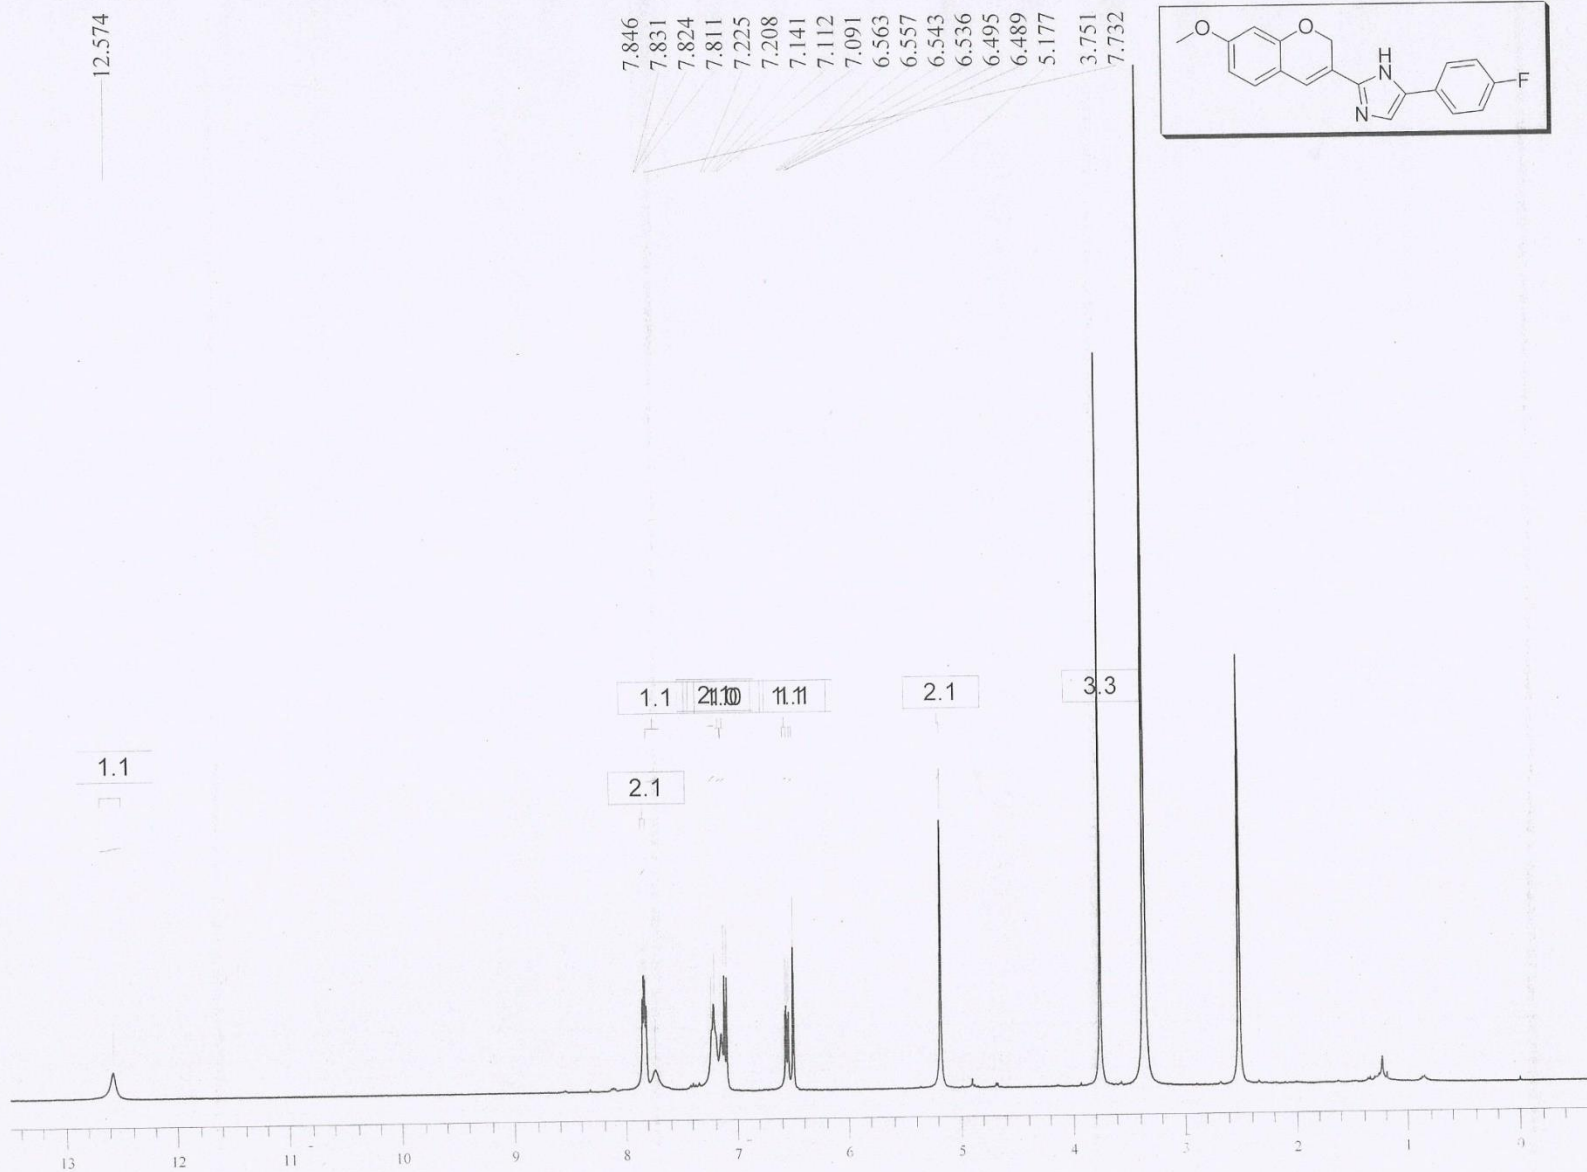

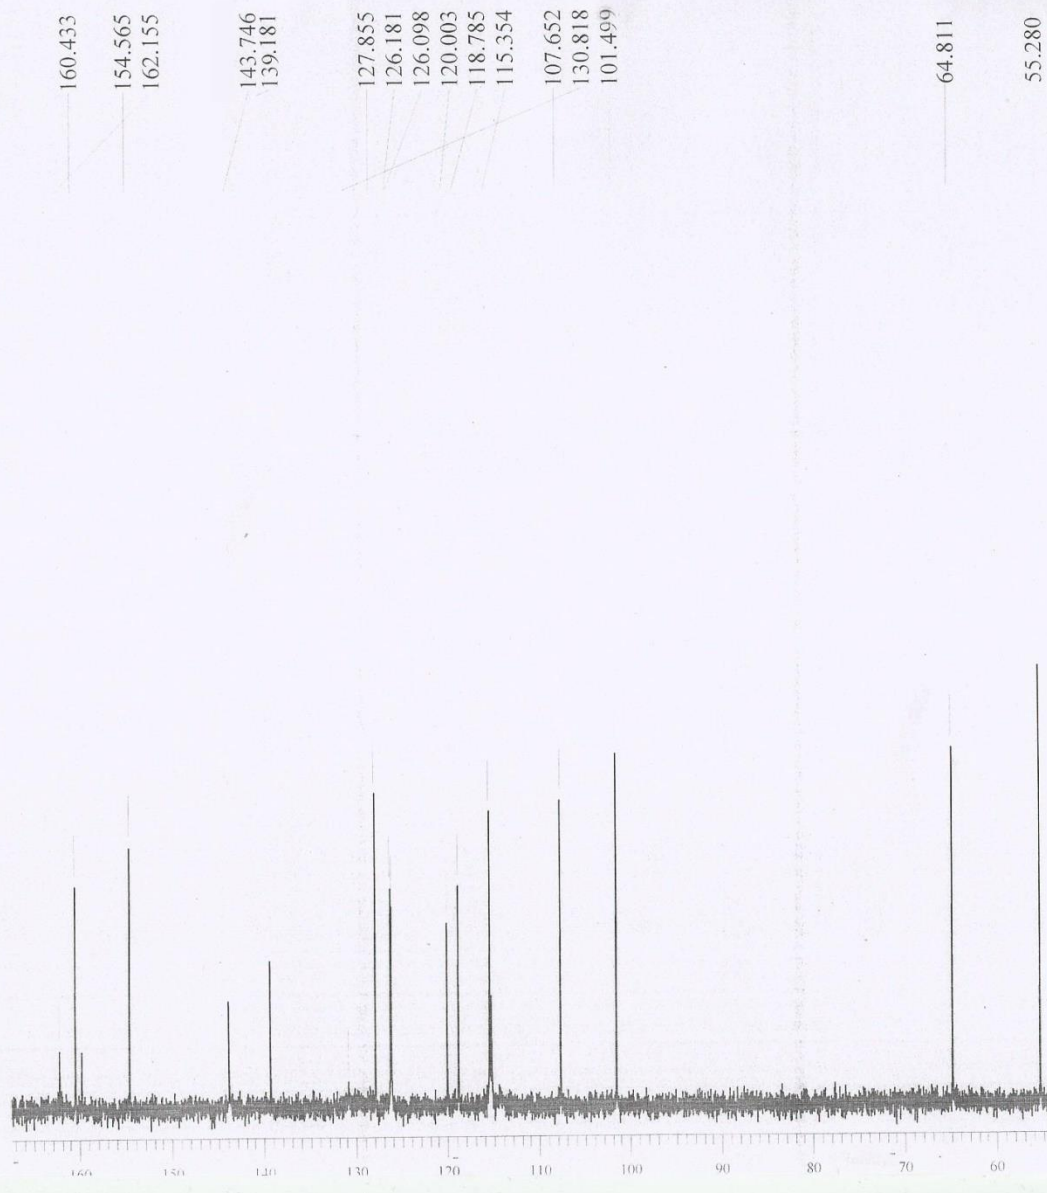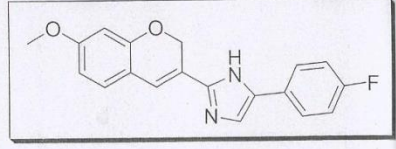

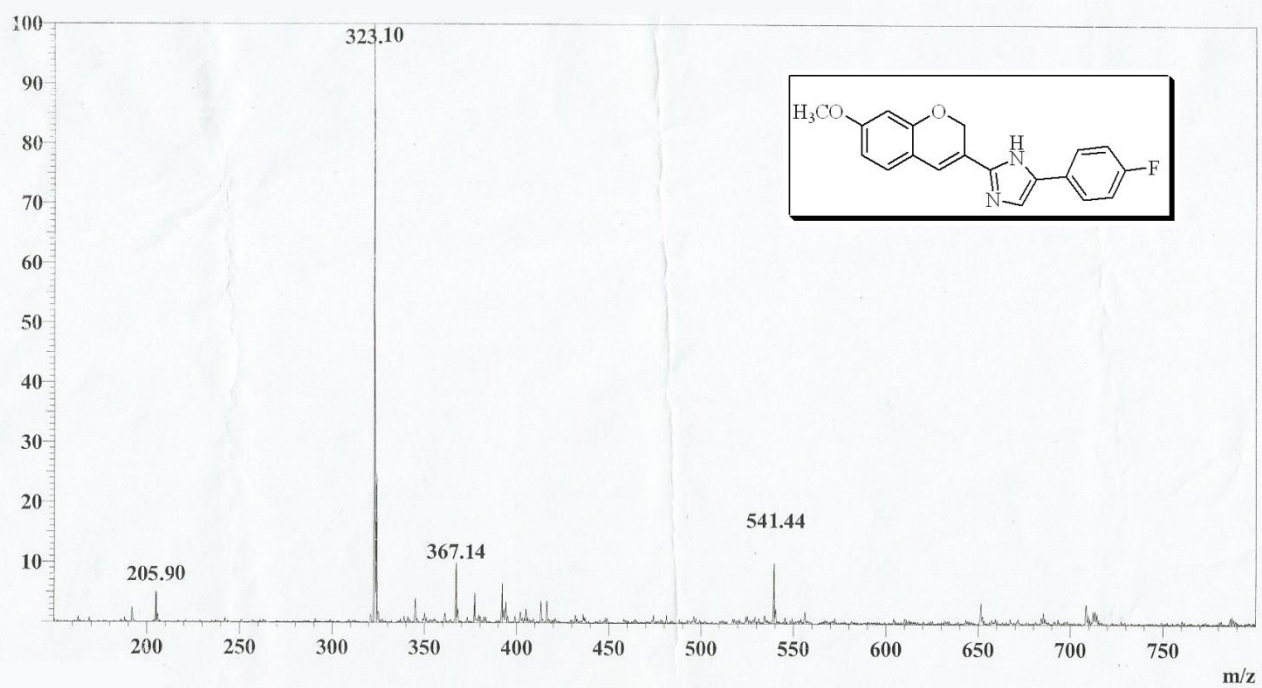

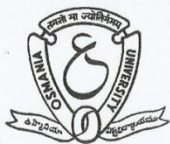

CENTRAL FACILITIES - OSMANIA UNIVERSITY

FTIR ANALYSIS REPORT

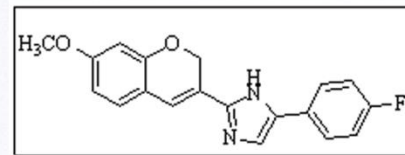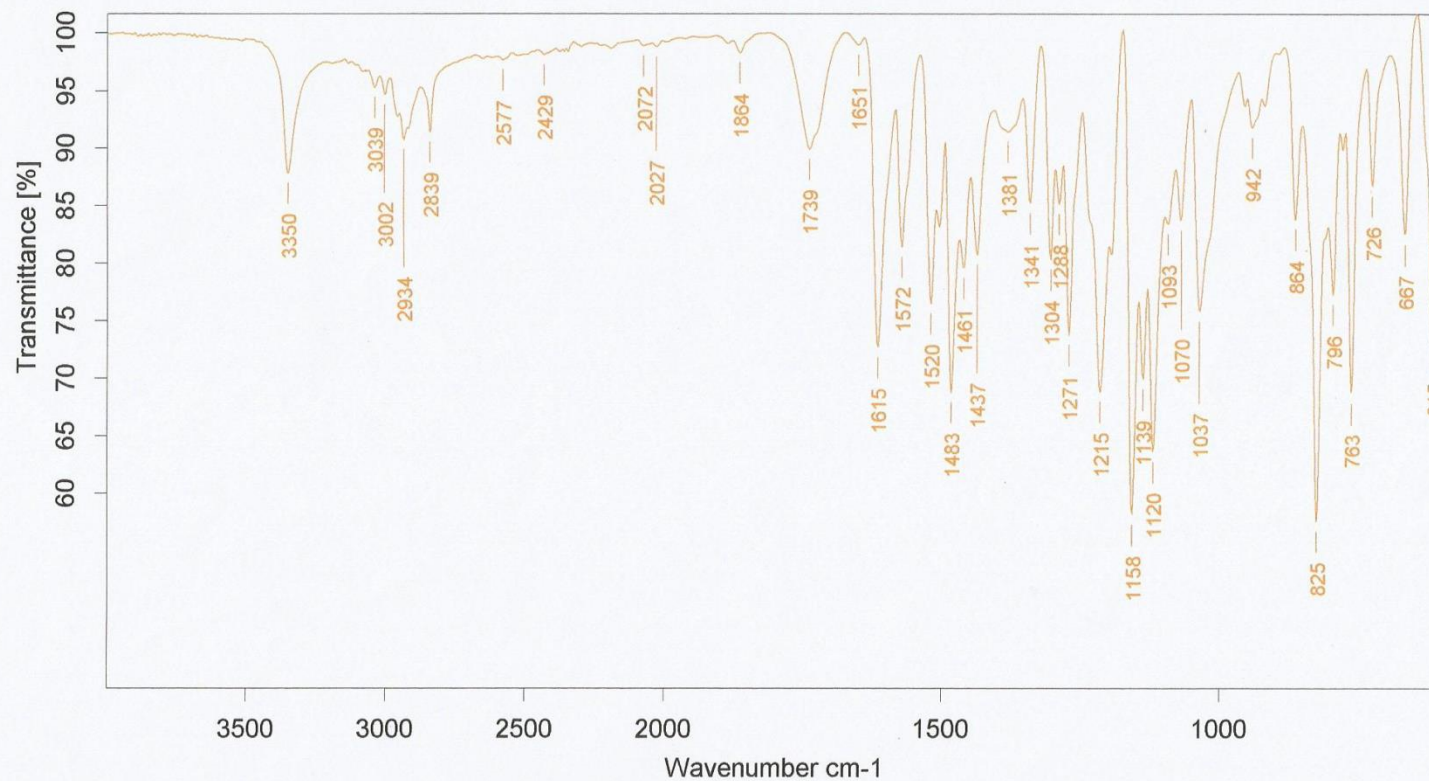

Sample Name: 1302-1052 9 7CR-3 Sample Form:ATR 22/02/2013 3:02:45 PM



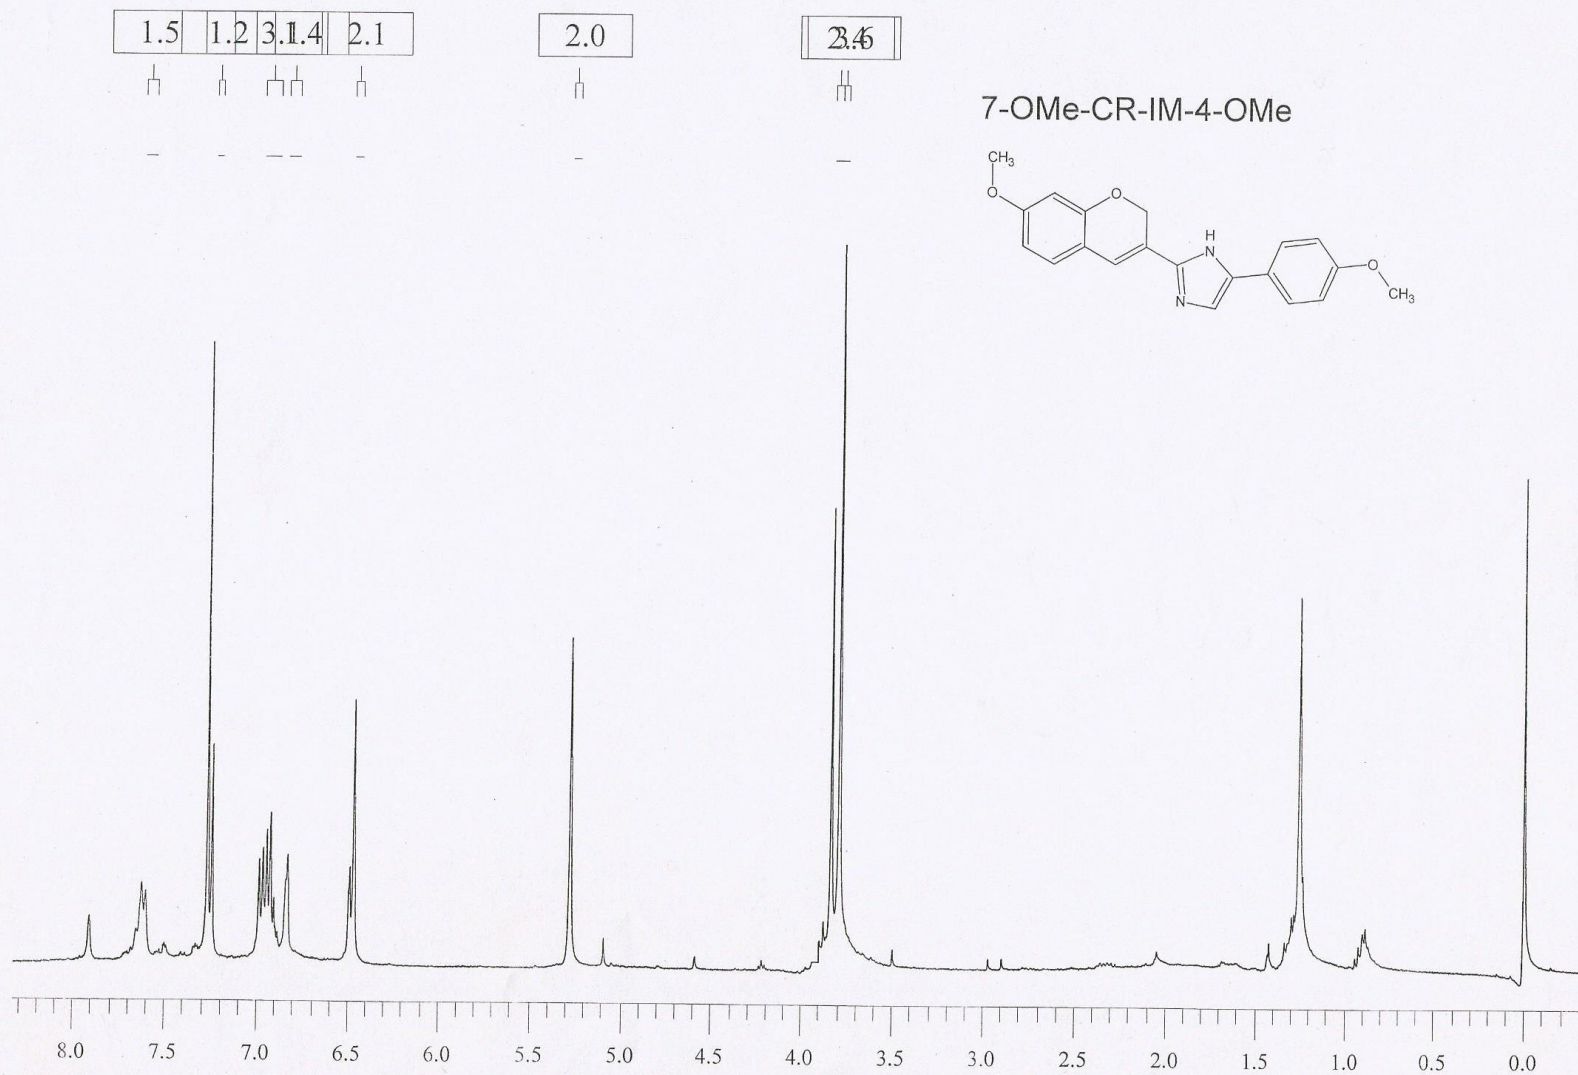

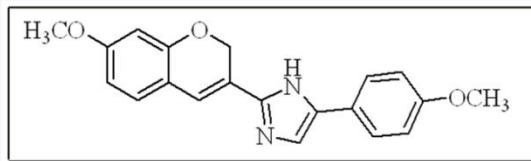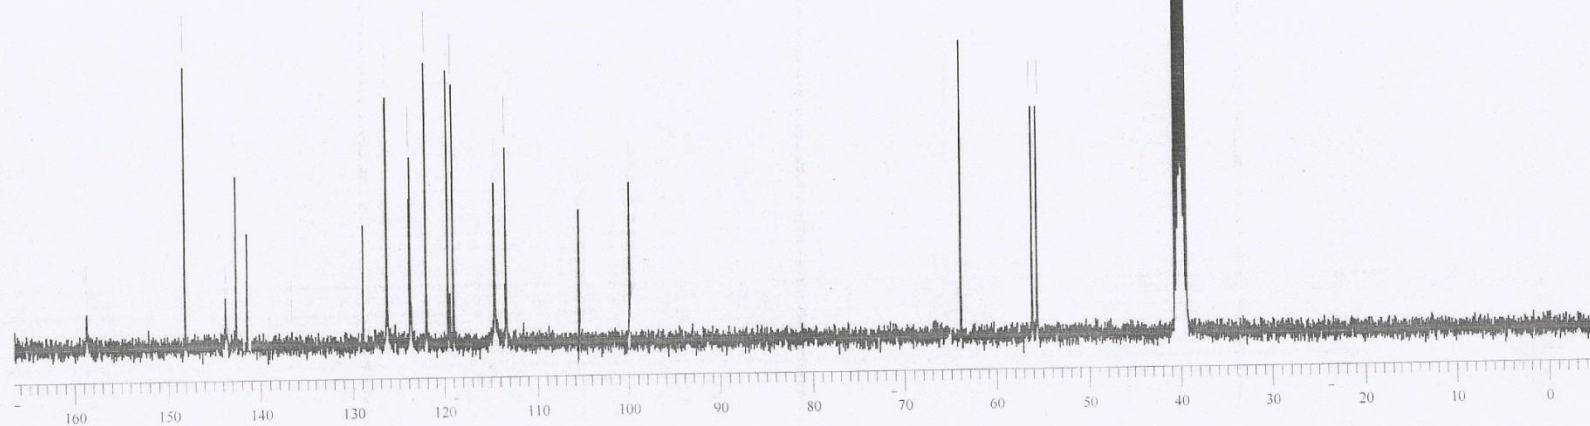

NKL-111040

15032013-020 4 (0.337) Cm (2:8-8:22)

6.57e6

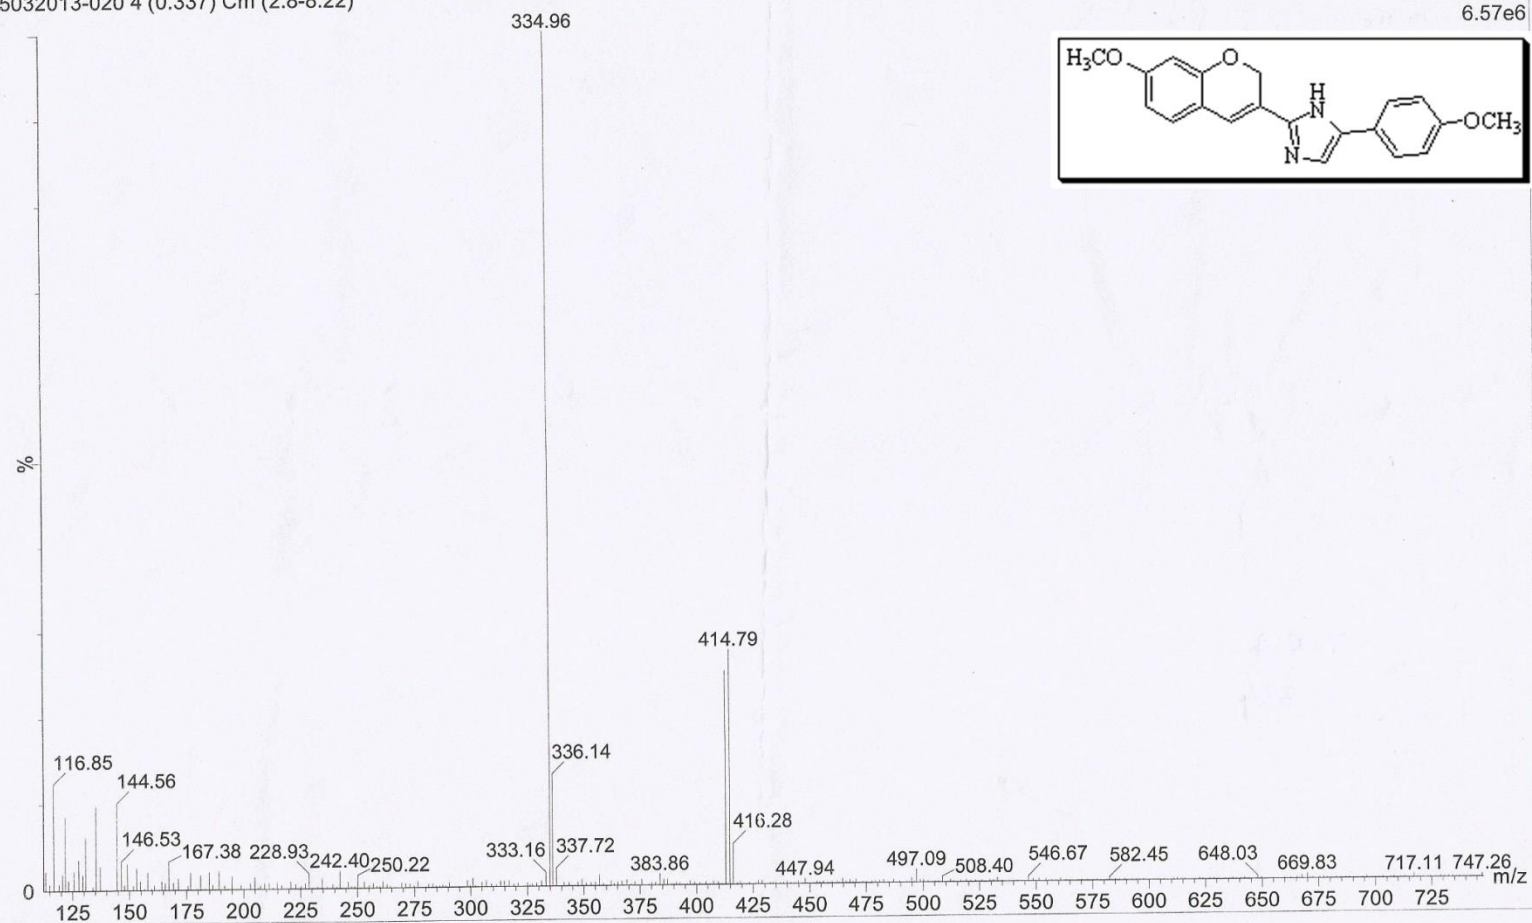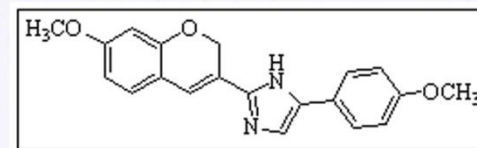

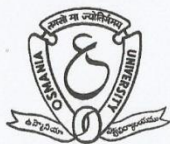

CENTRAL FACILITIES - OSMANIA UNIVERSITY

FTIR ANALYSIS REPORT

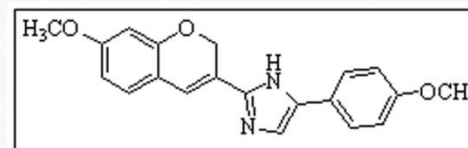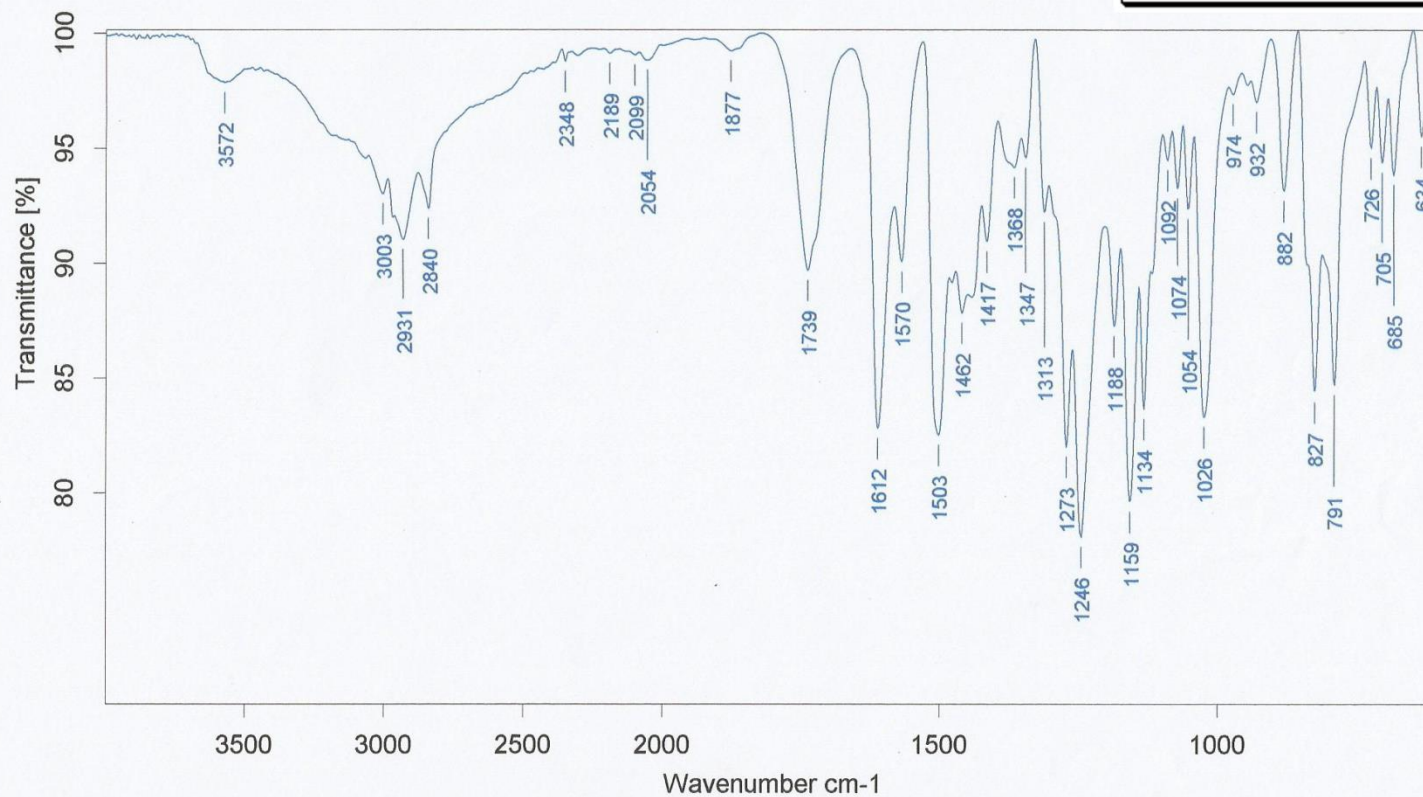

Sample Name: 1302-1052 10 7CR-4

Sample Form:ATR

22/02/2013

3:06:11 PM



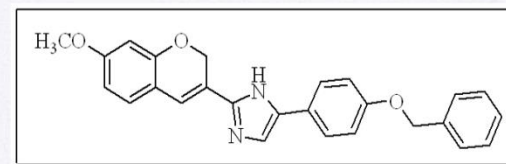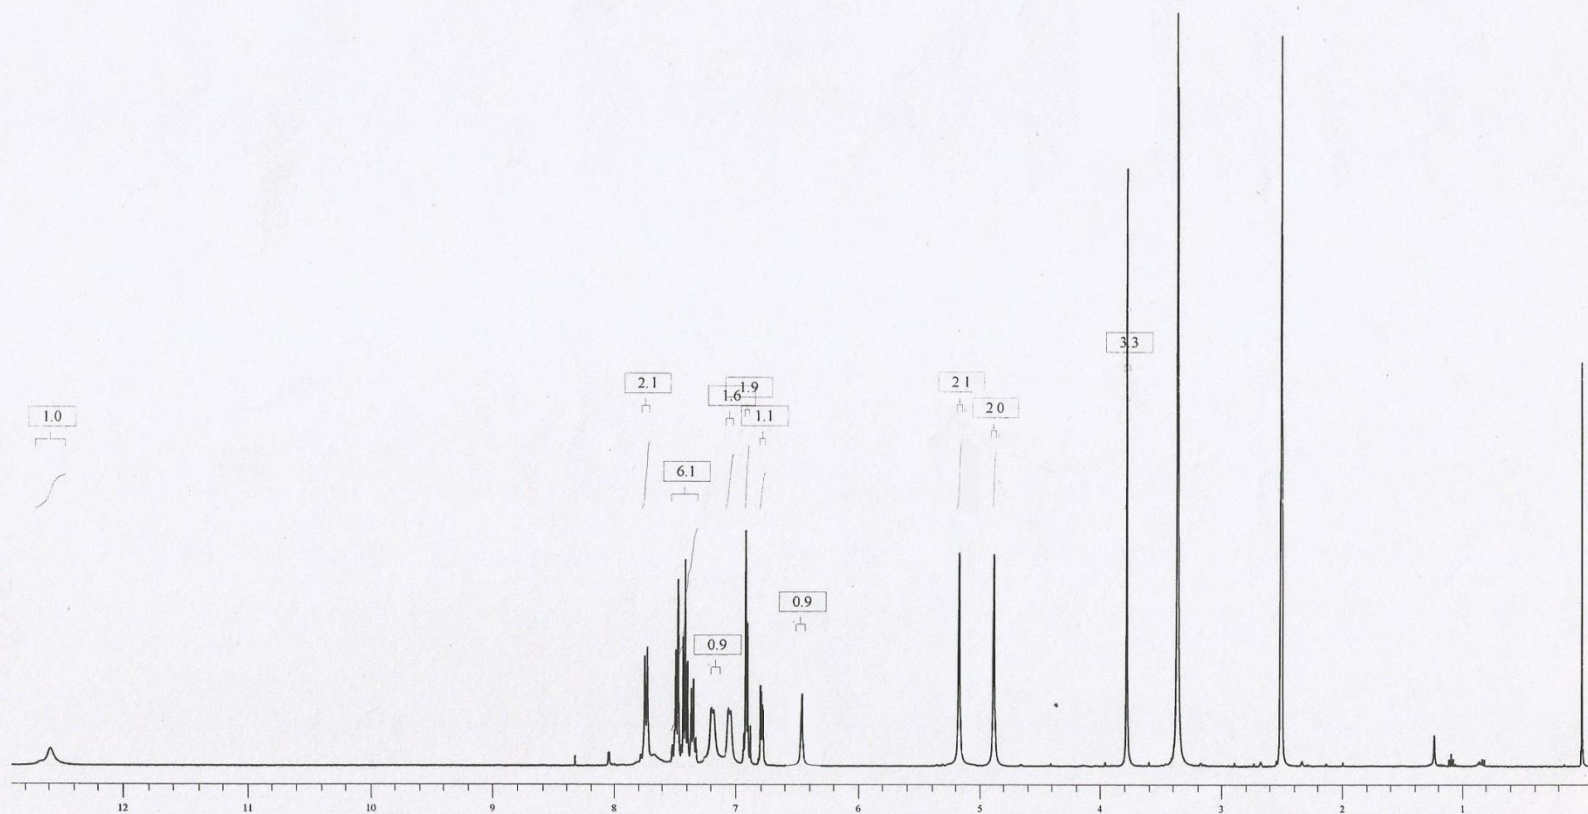

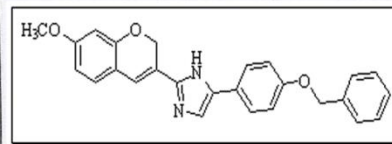

16032013-018 3 (0.221) Cm (2:7-(7:22+1:2))

3: Scan ES-  
5.71e5

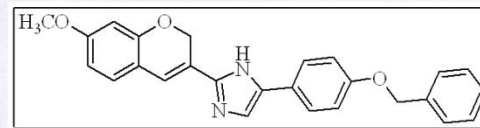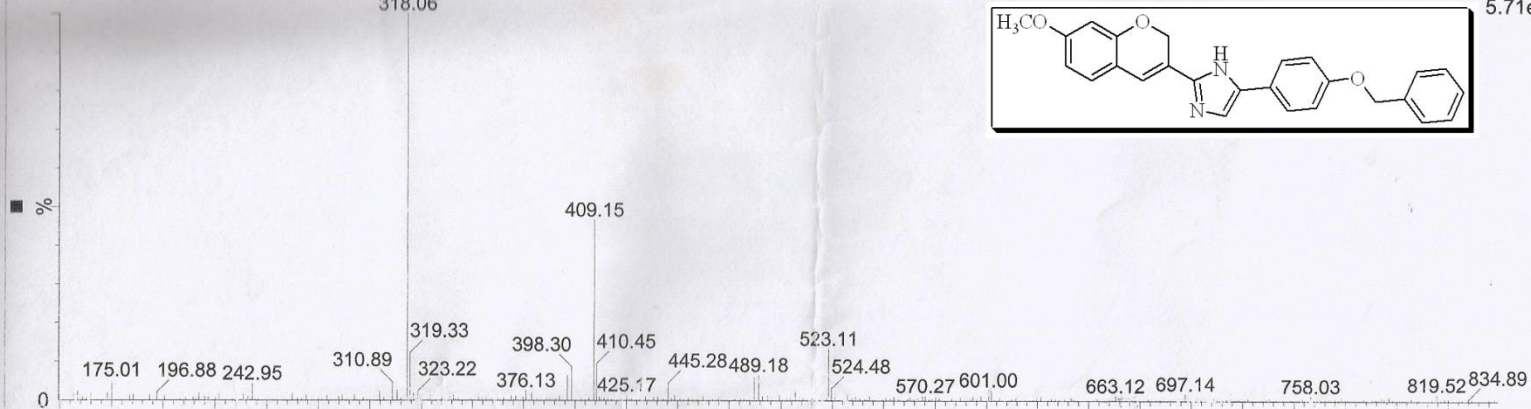

16032013-018 3 (0.244) Cm (2:6-11:22)

5: Scan ES+  
1.22e7

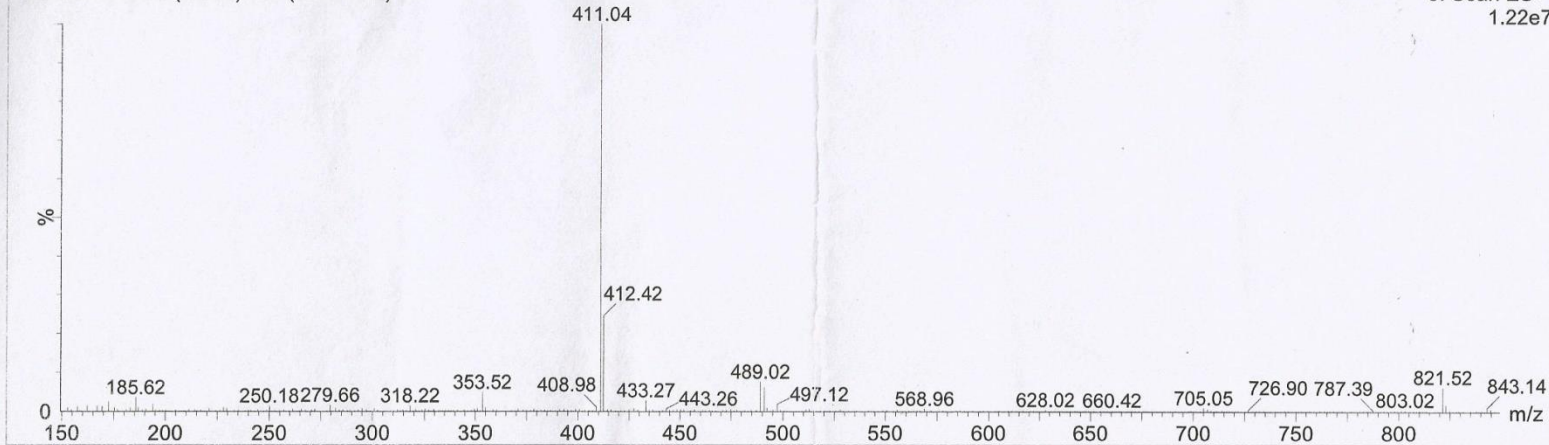



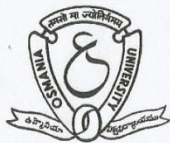

CENTRAL FACILITIES - OSMANIA UNIVERSITY

FTIR ANALYSIS REPORT

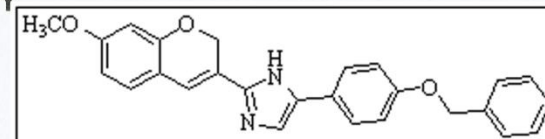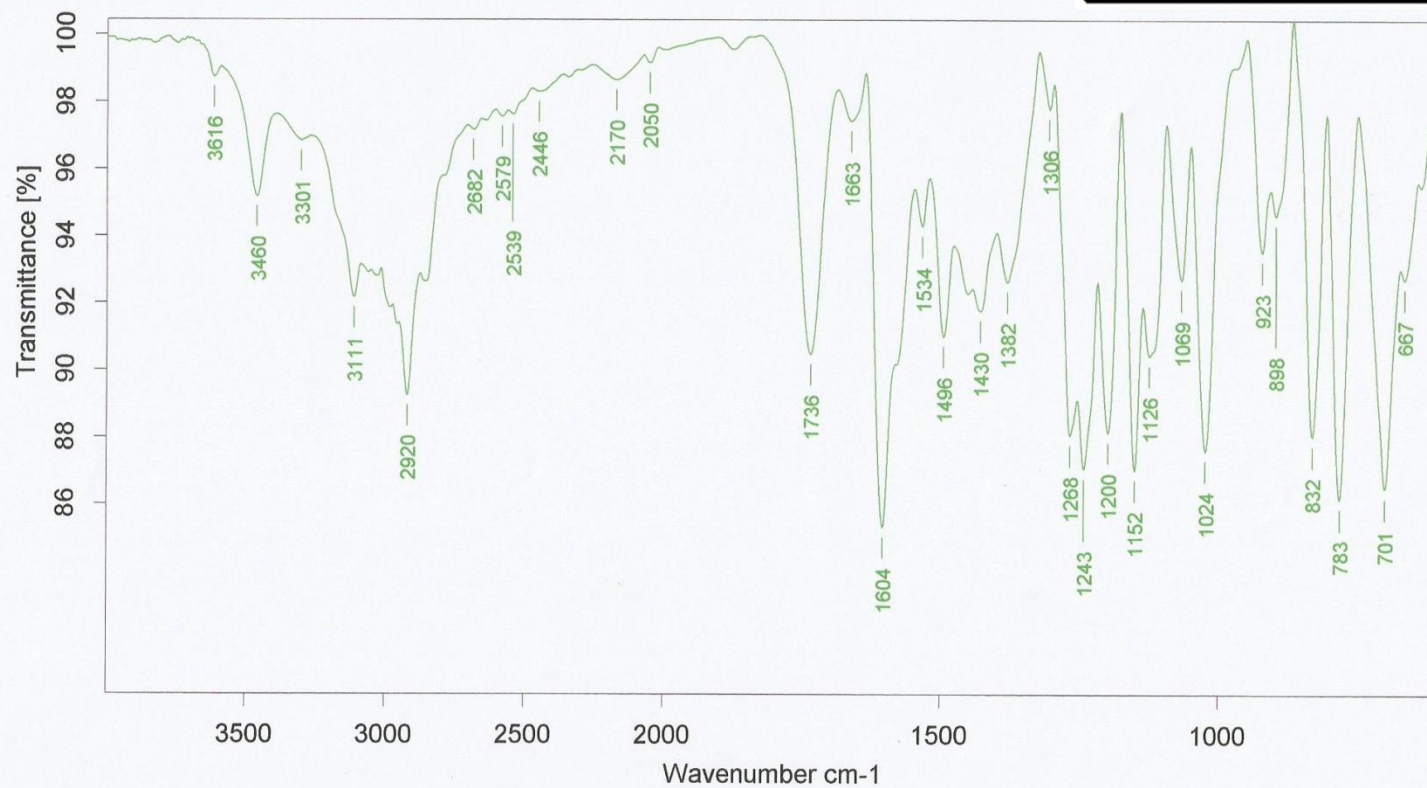

Sample Name: 1302-1052 12 7CR-6 Sample Form:ATR 22/02/2013 3:14:24 PM



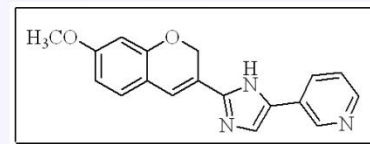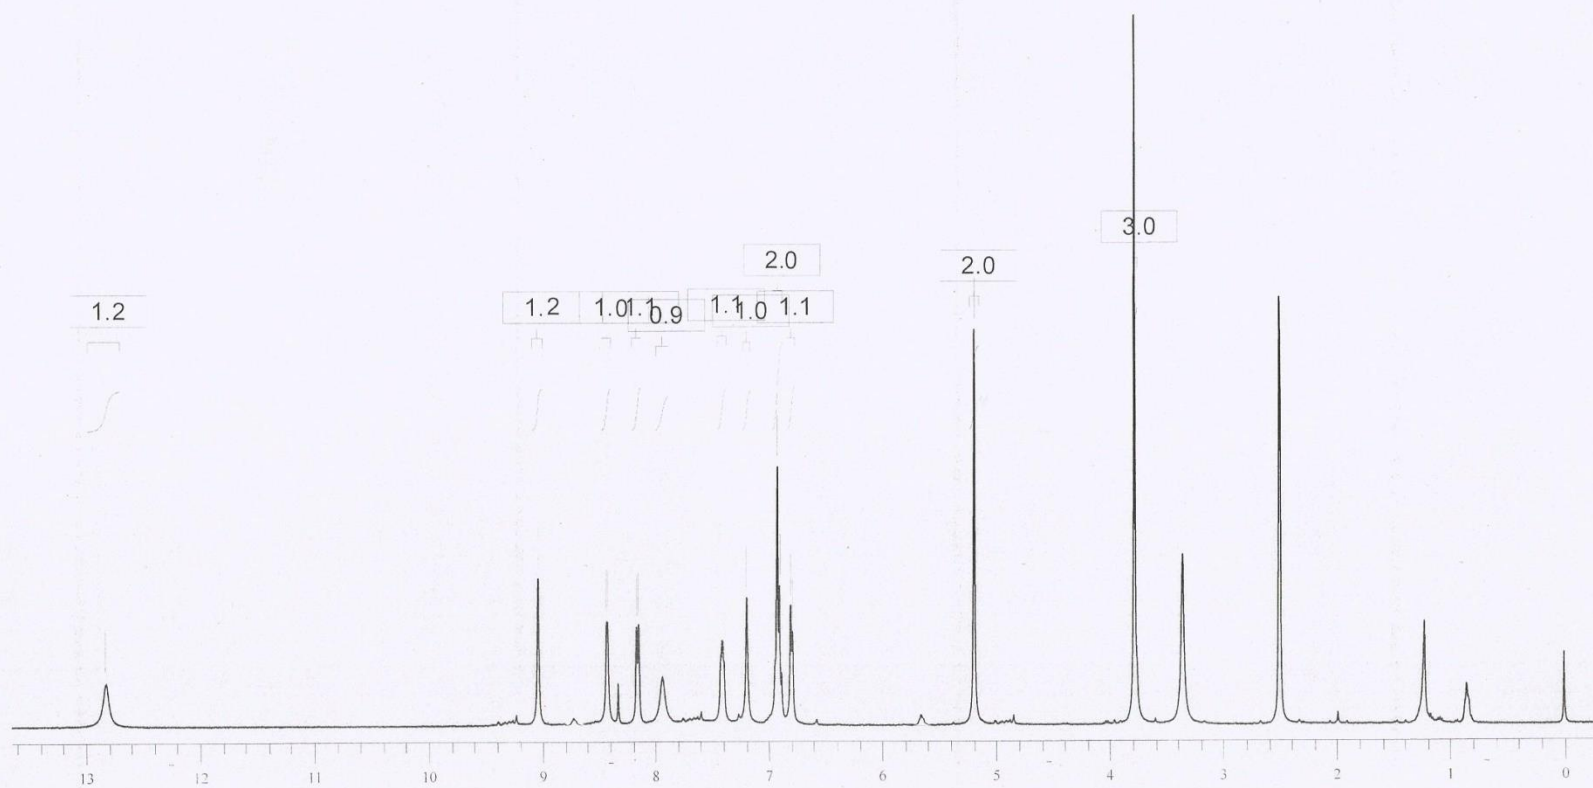

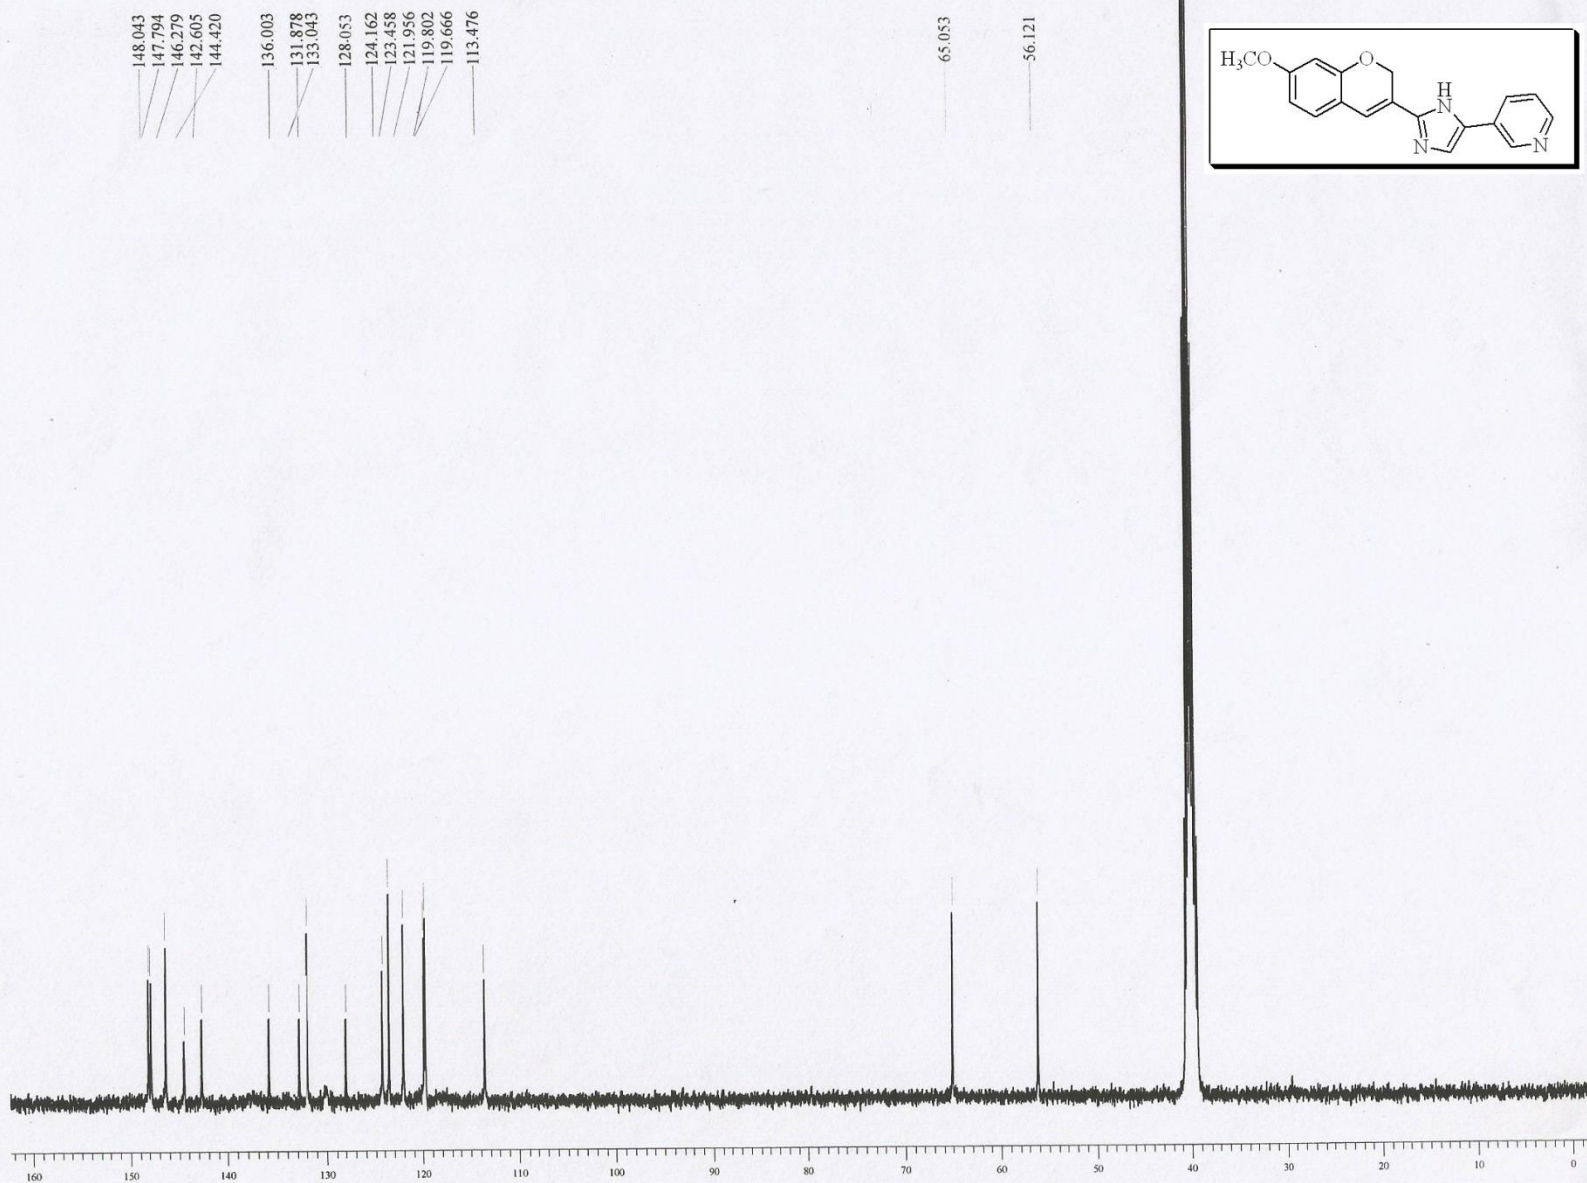

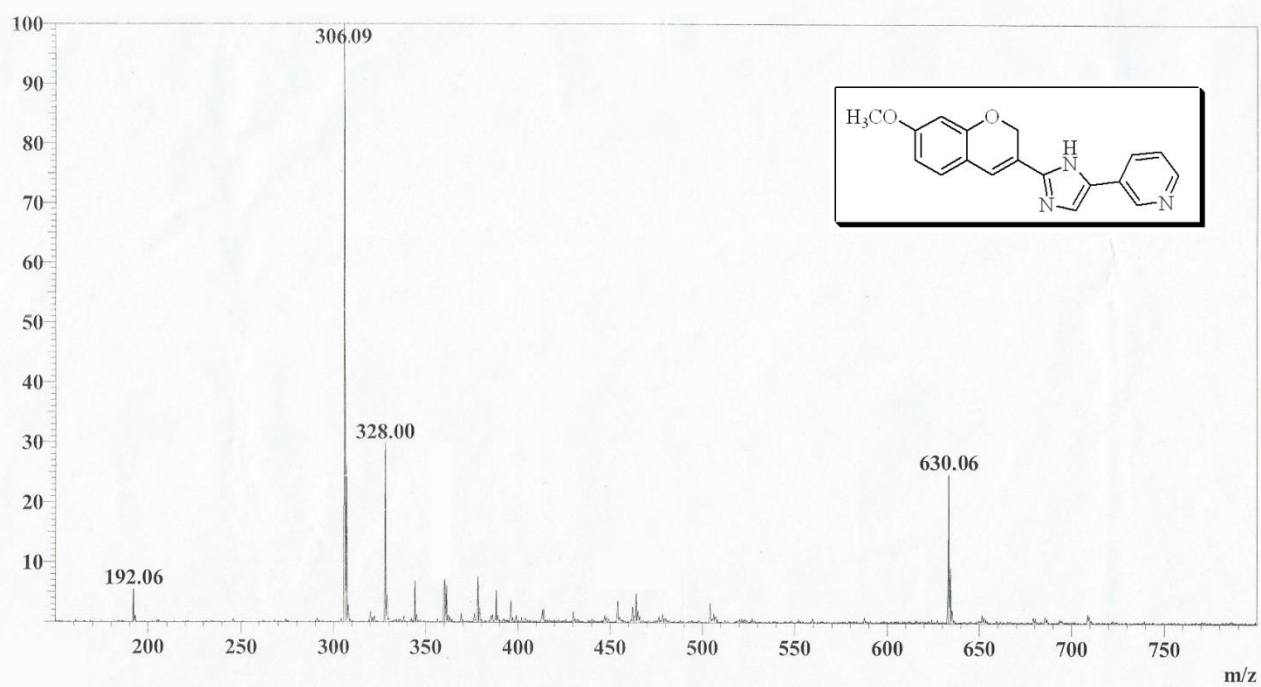



CENTRAL FACILITIES - OSMANIA UNIVERSITY

FTIR ANALYSIS REPORT

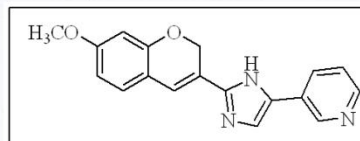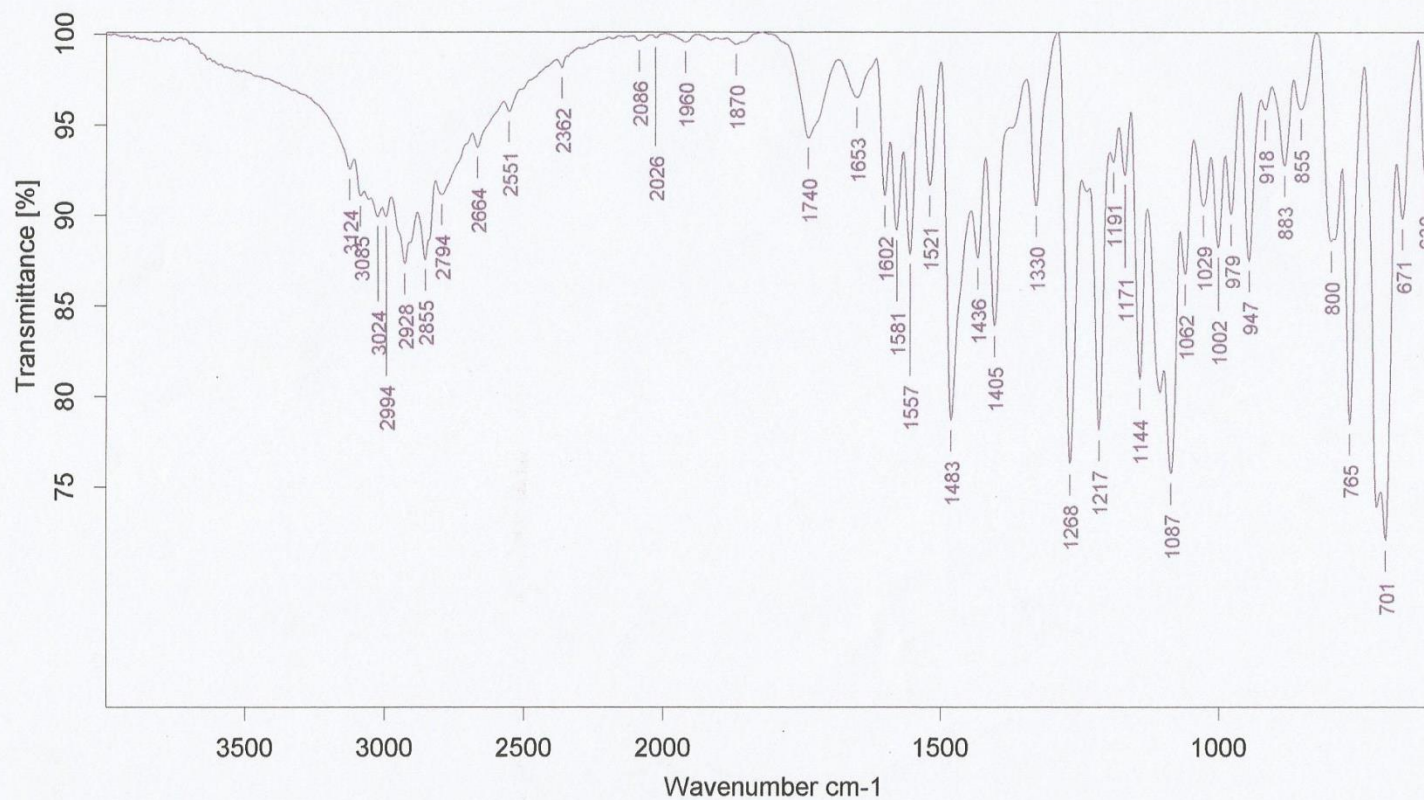

Sample Name: 1302-1052

7CR- 12

Sample Form:ATR

28/02/2013

10:50:20 AM



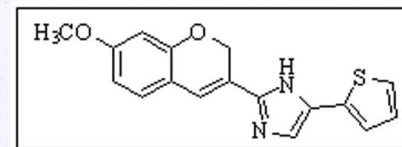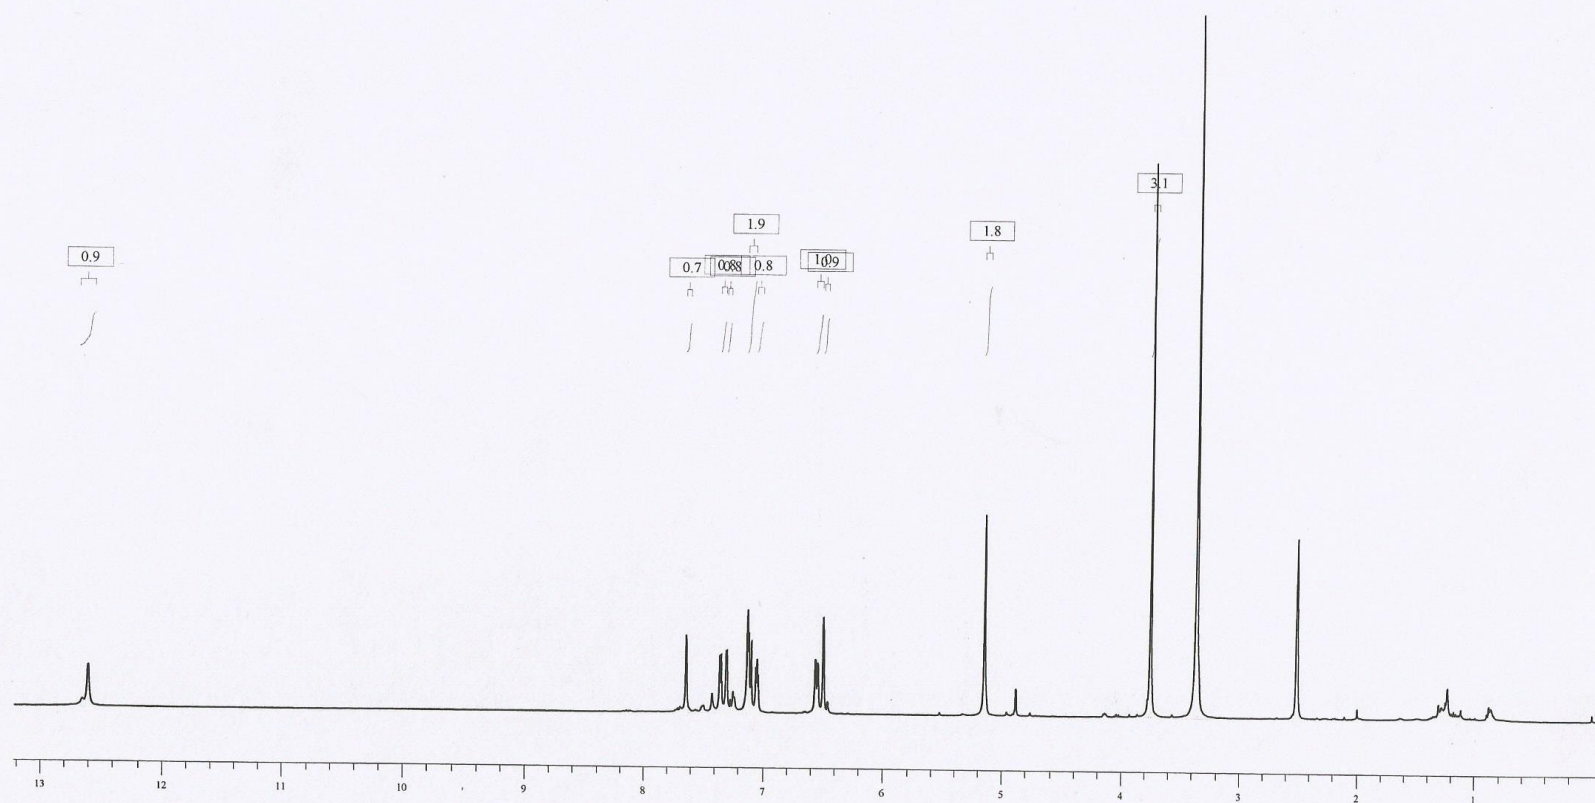

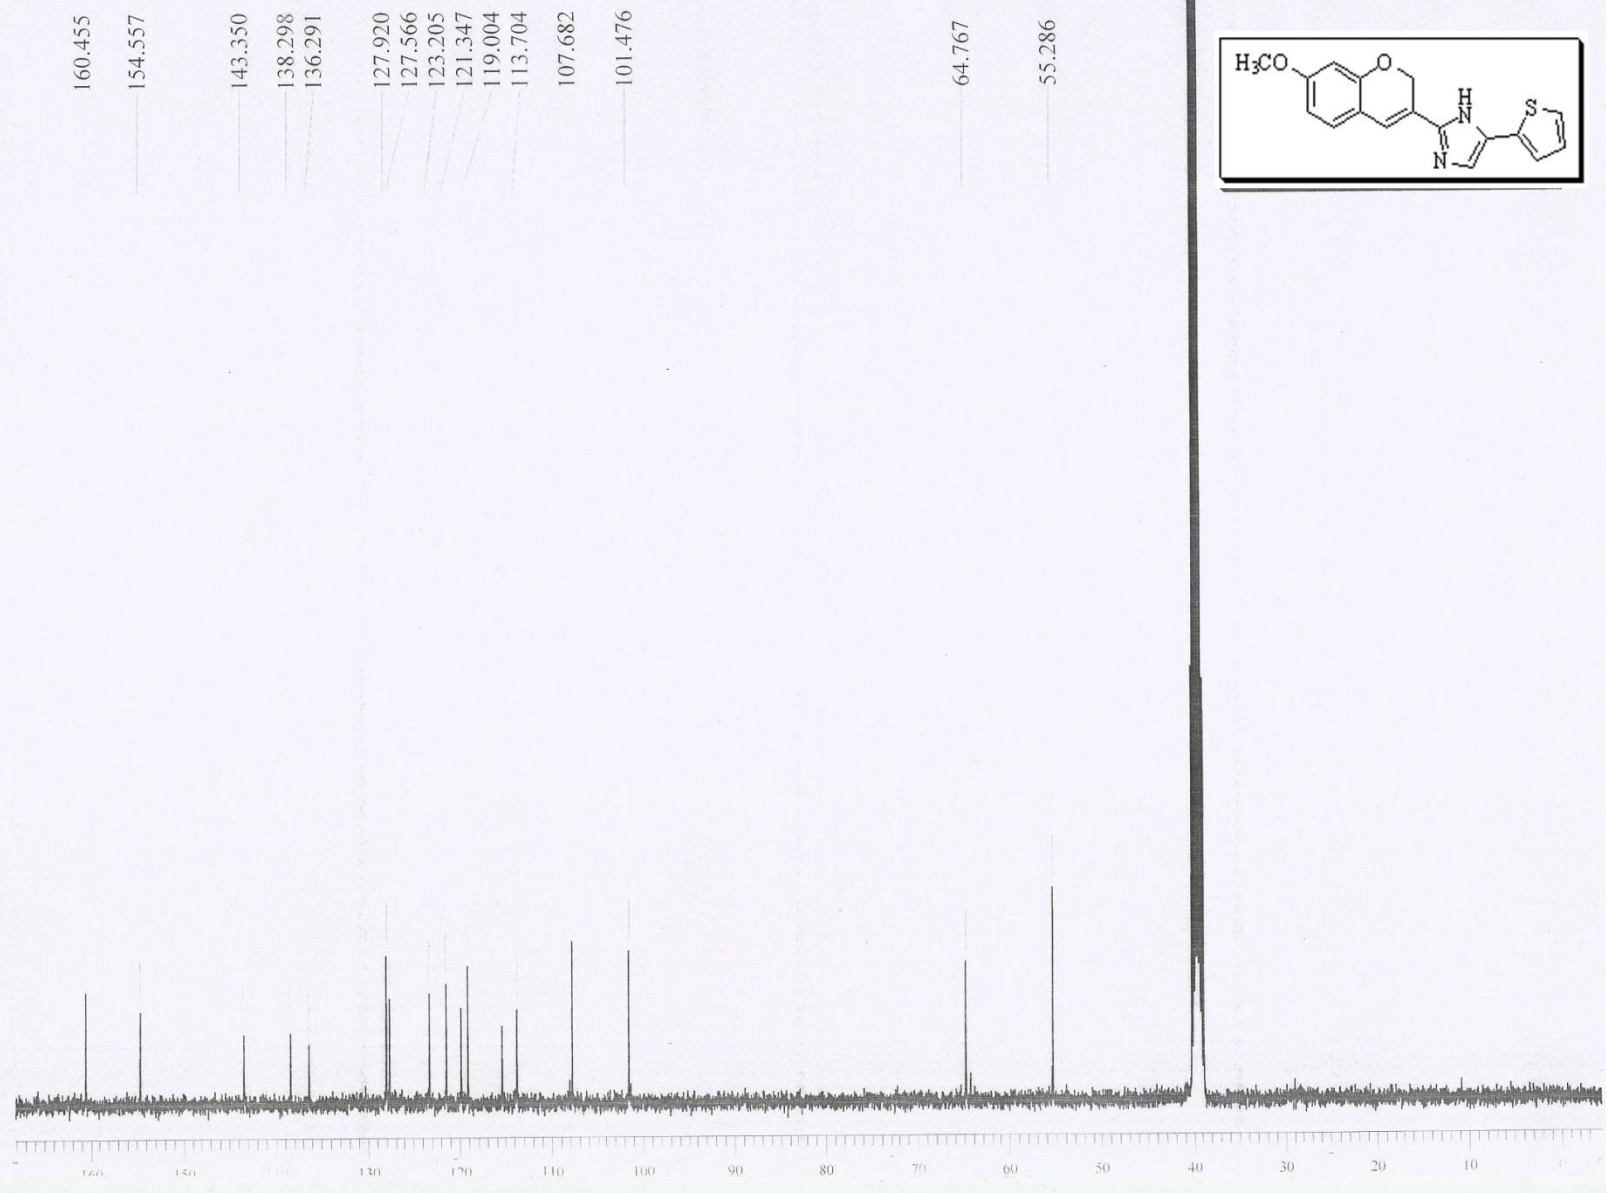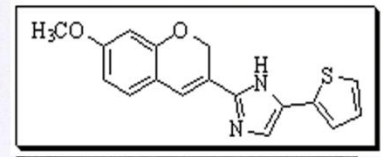

28052013-041 6 (0.347) Cm (3:6-(6:12+1:2))

5: Scan ES+  
6.45e7

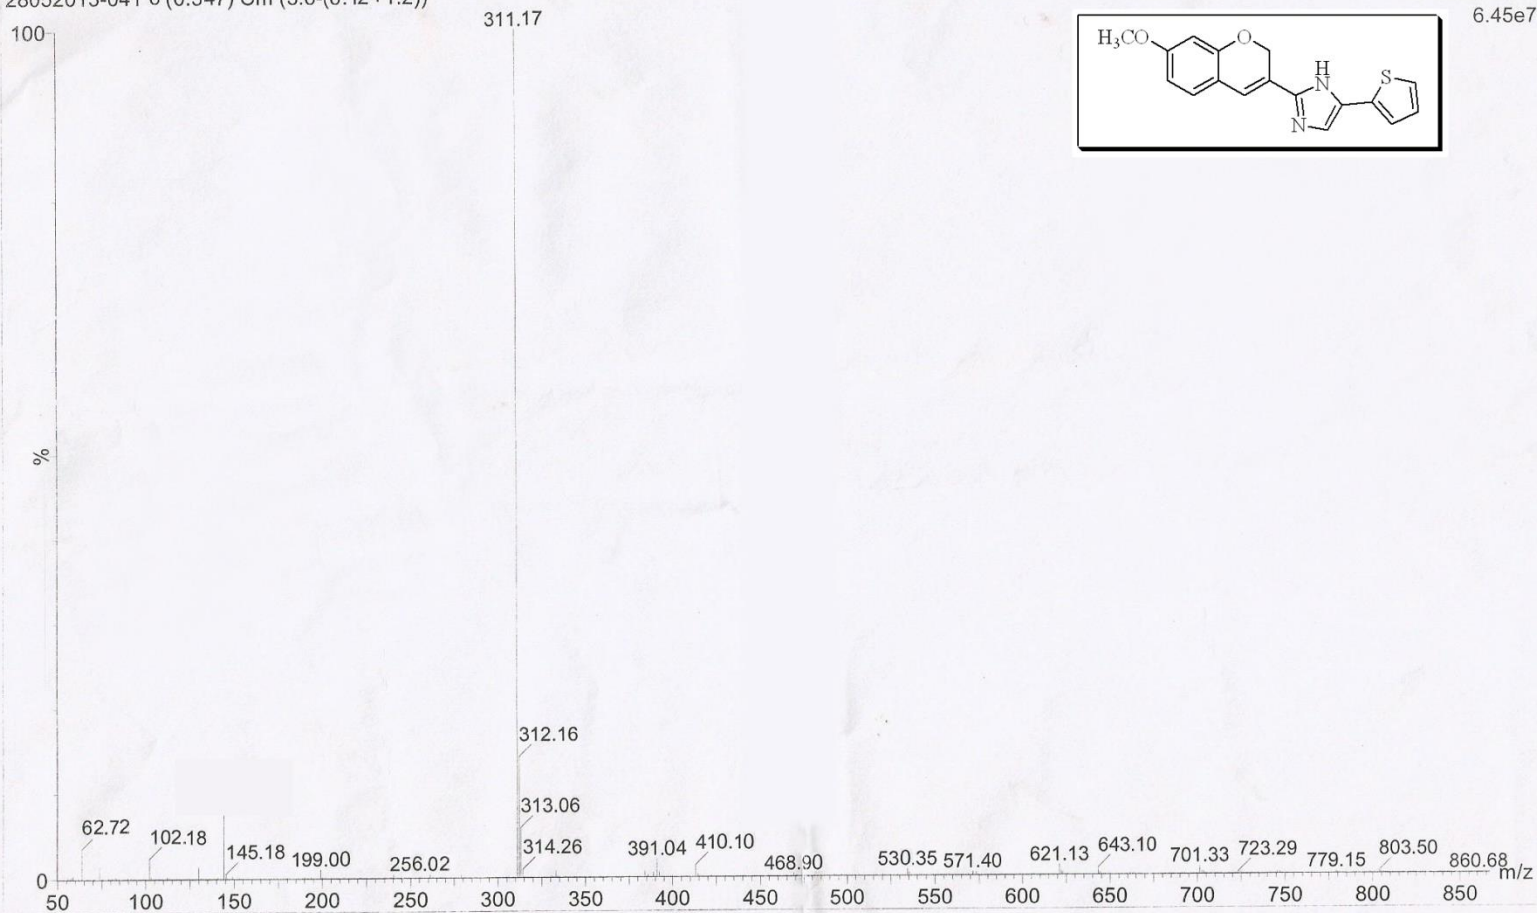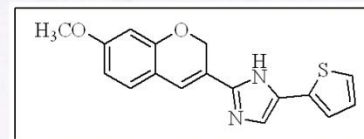

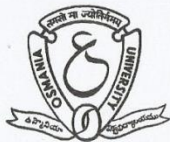

CENTRAL FACILITIES - OSMANIA UNIVERSITY

FTIR ANALYSIS REPORT

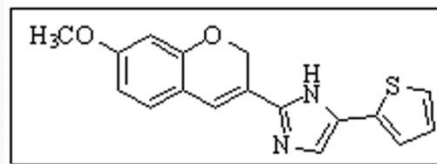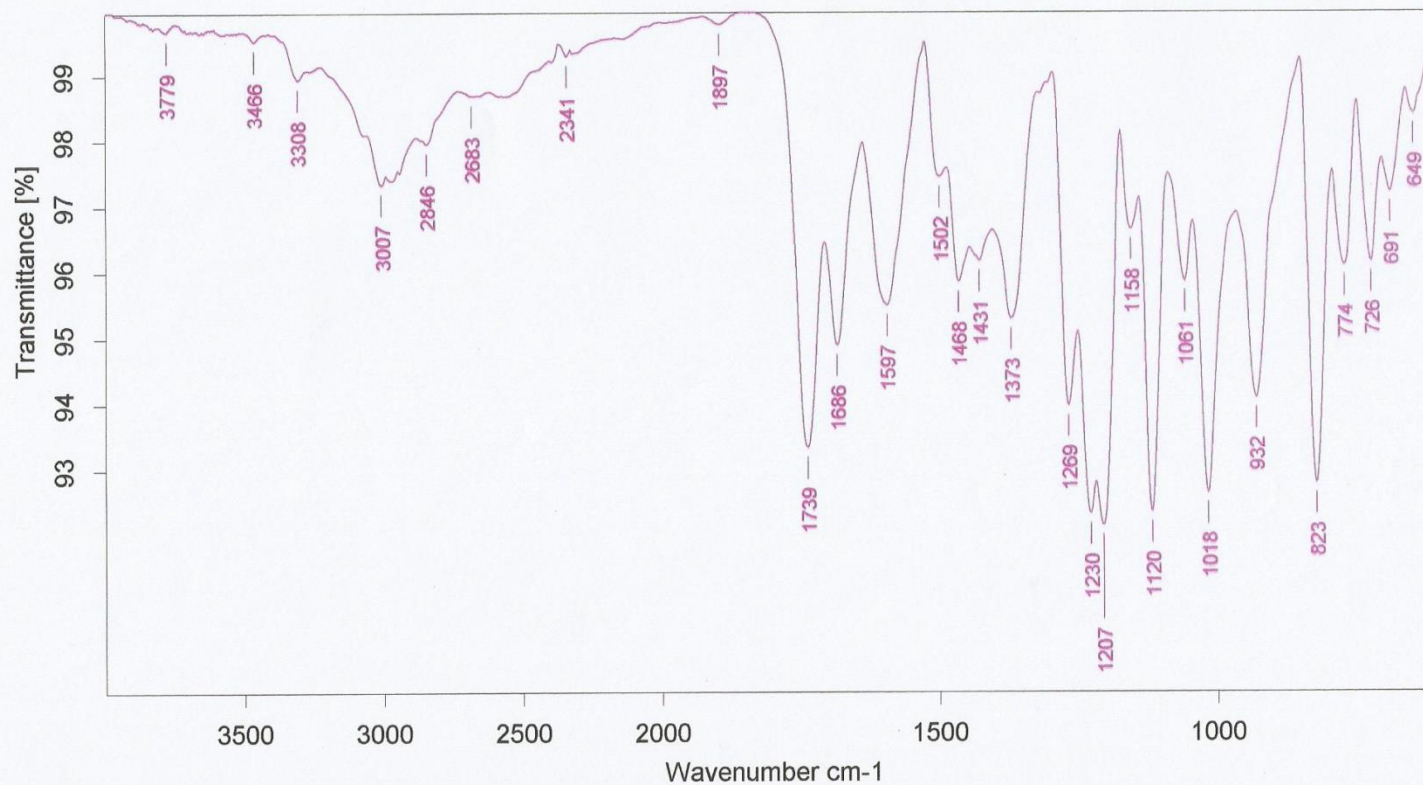

Sample Name: 1302-1052 11 7CR-5 Sample Form:ATR 22/02/2013 3:12:11 PM



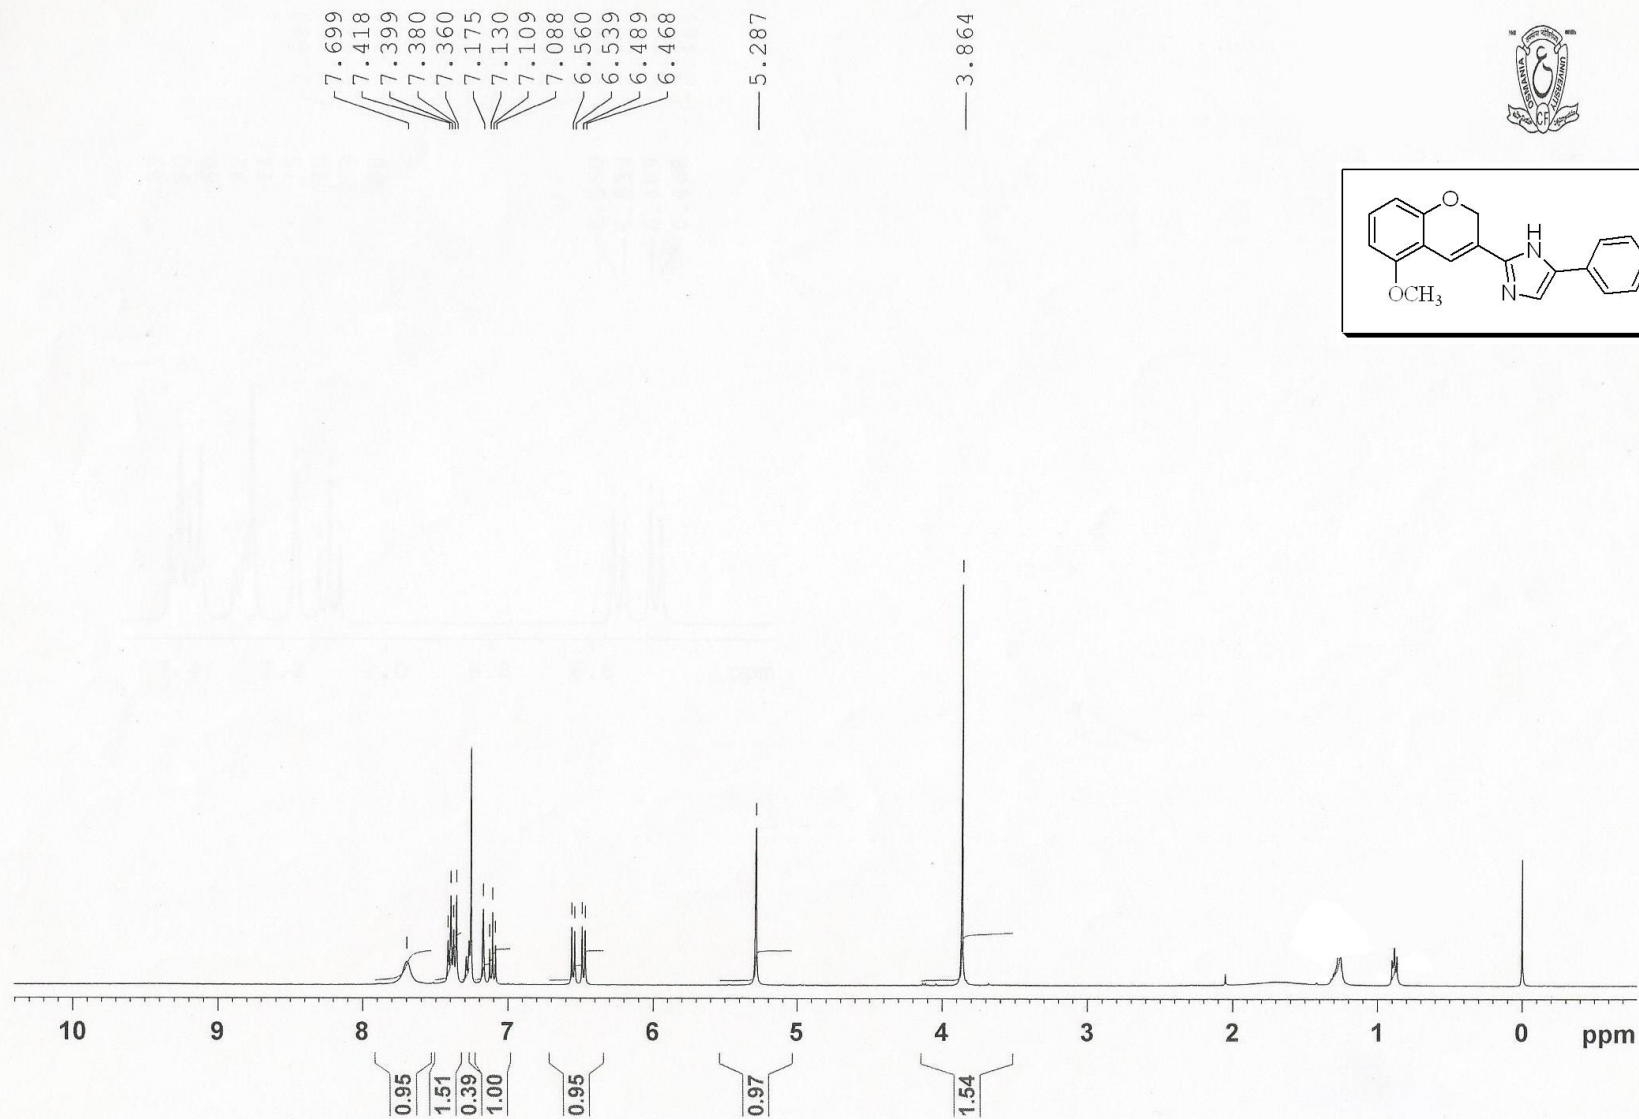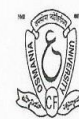

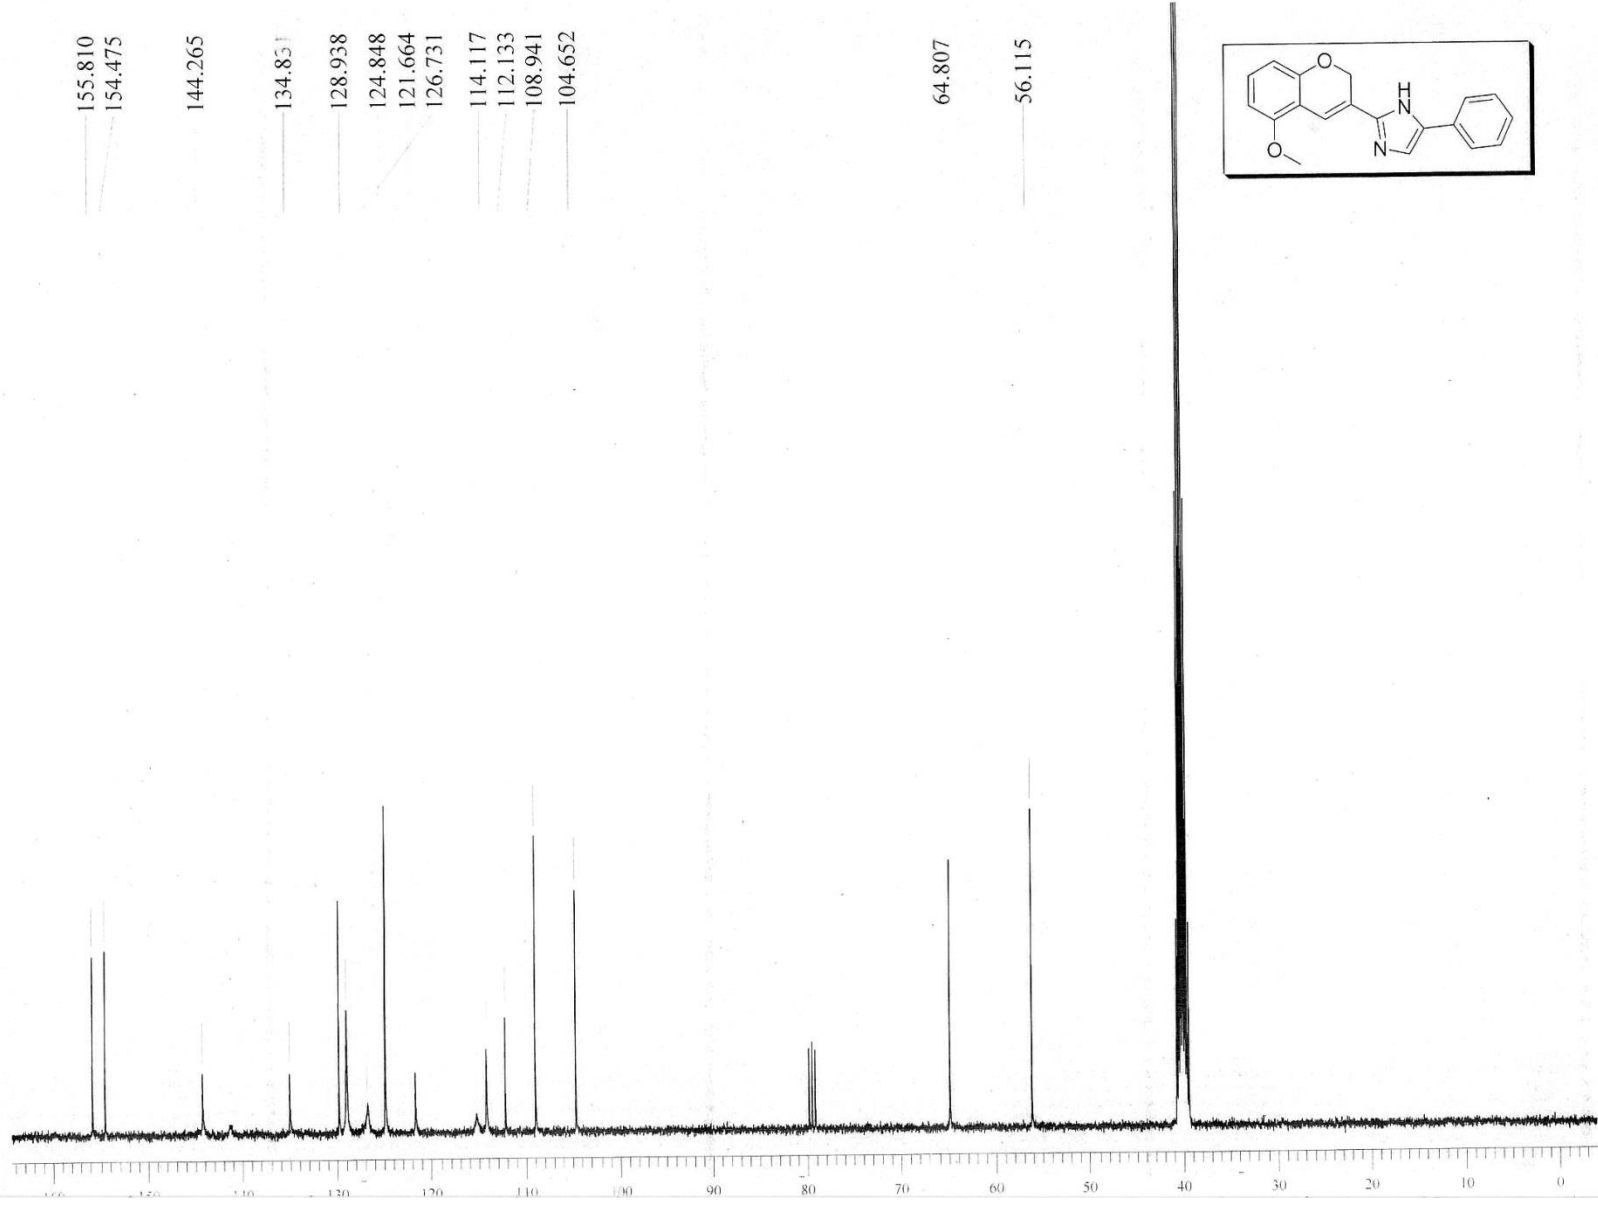

KOR/CDS/056/A

OSPL031211006 11 (0.222) Cm (6:18-(30+41))

03-Dec-2011 12:29:41

2: Scan ES-

9.35e6

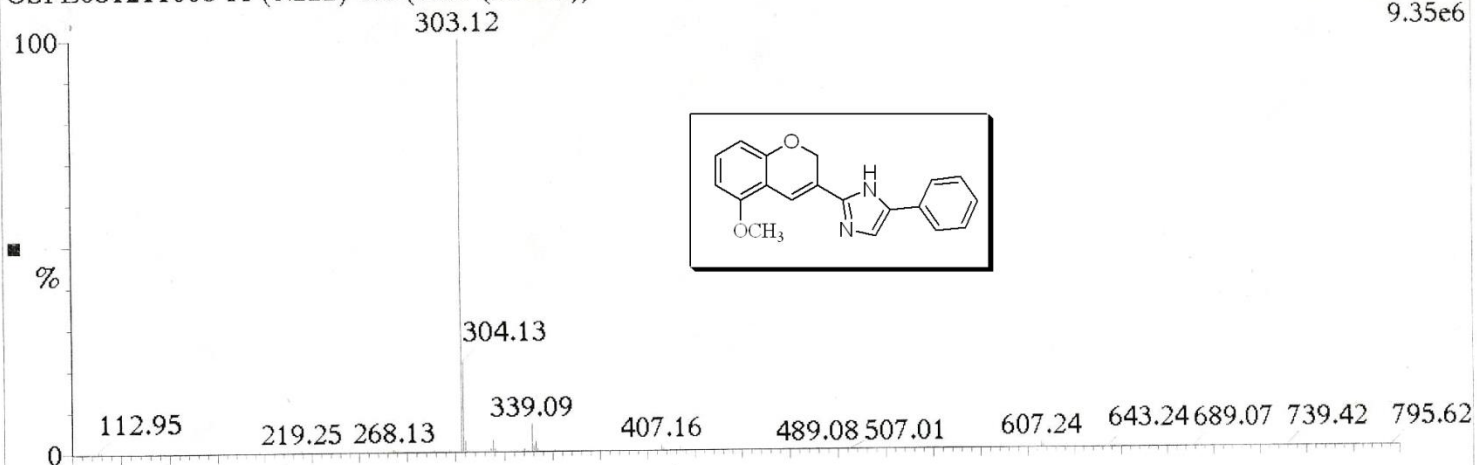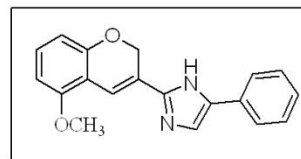

OSPL031211006 8 (0.151) Cm (7:24-(41+36))

1: Scan ES+

7.15e7

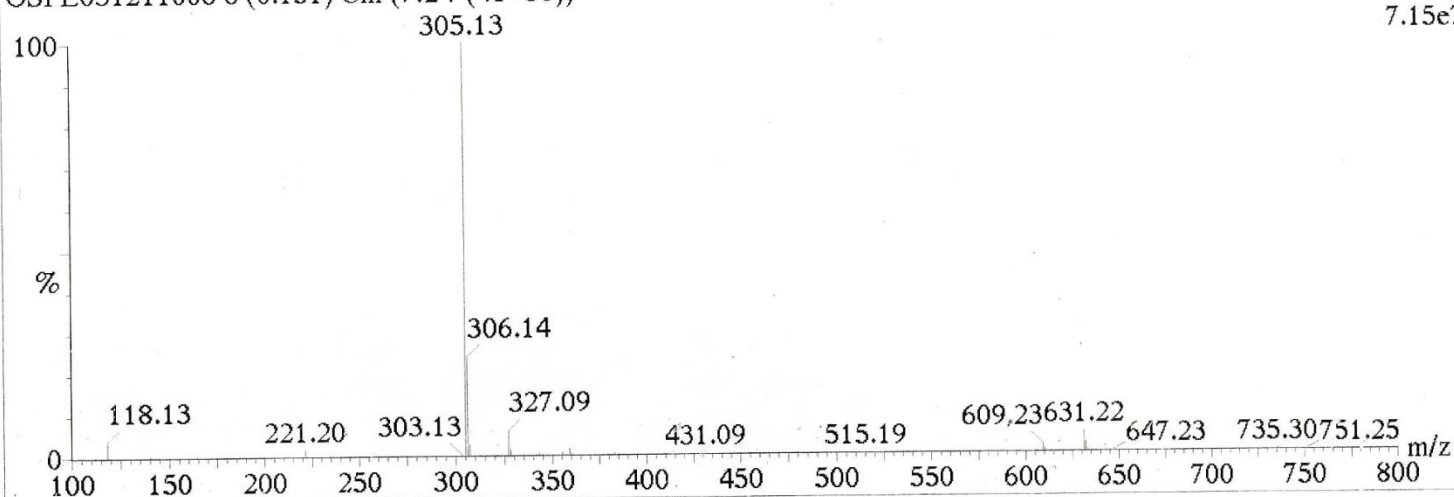

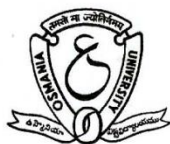

# CENTRAL FACILITIES - OSMANIA UNIVERSITY

## FTIR ANALYSIS REPORT

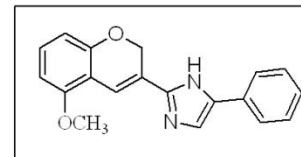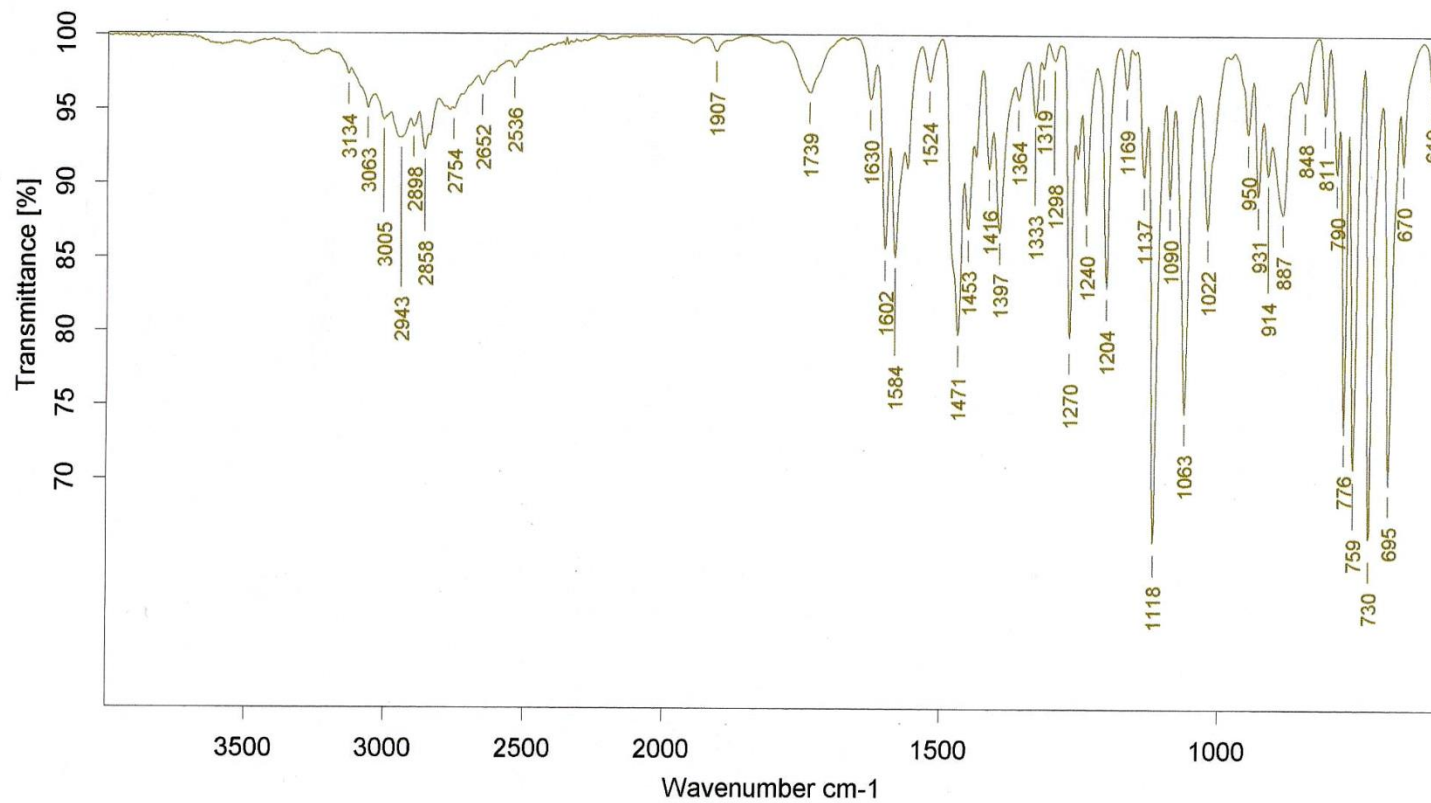

Sample Name: 1302-1052 1 5-OMe-CR 1

Sample Form:ATR

22/02/2013

2:34:13 PM



1

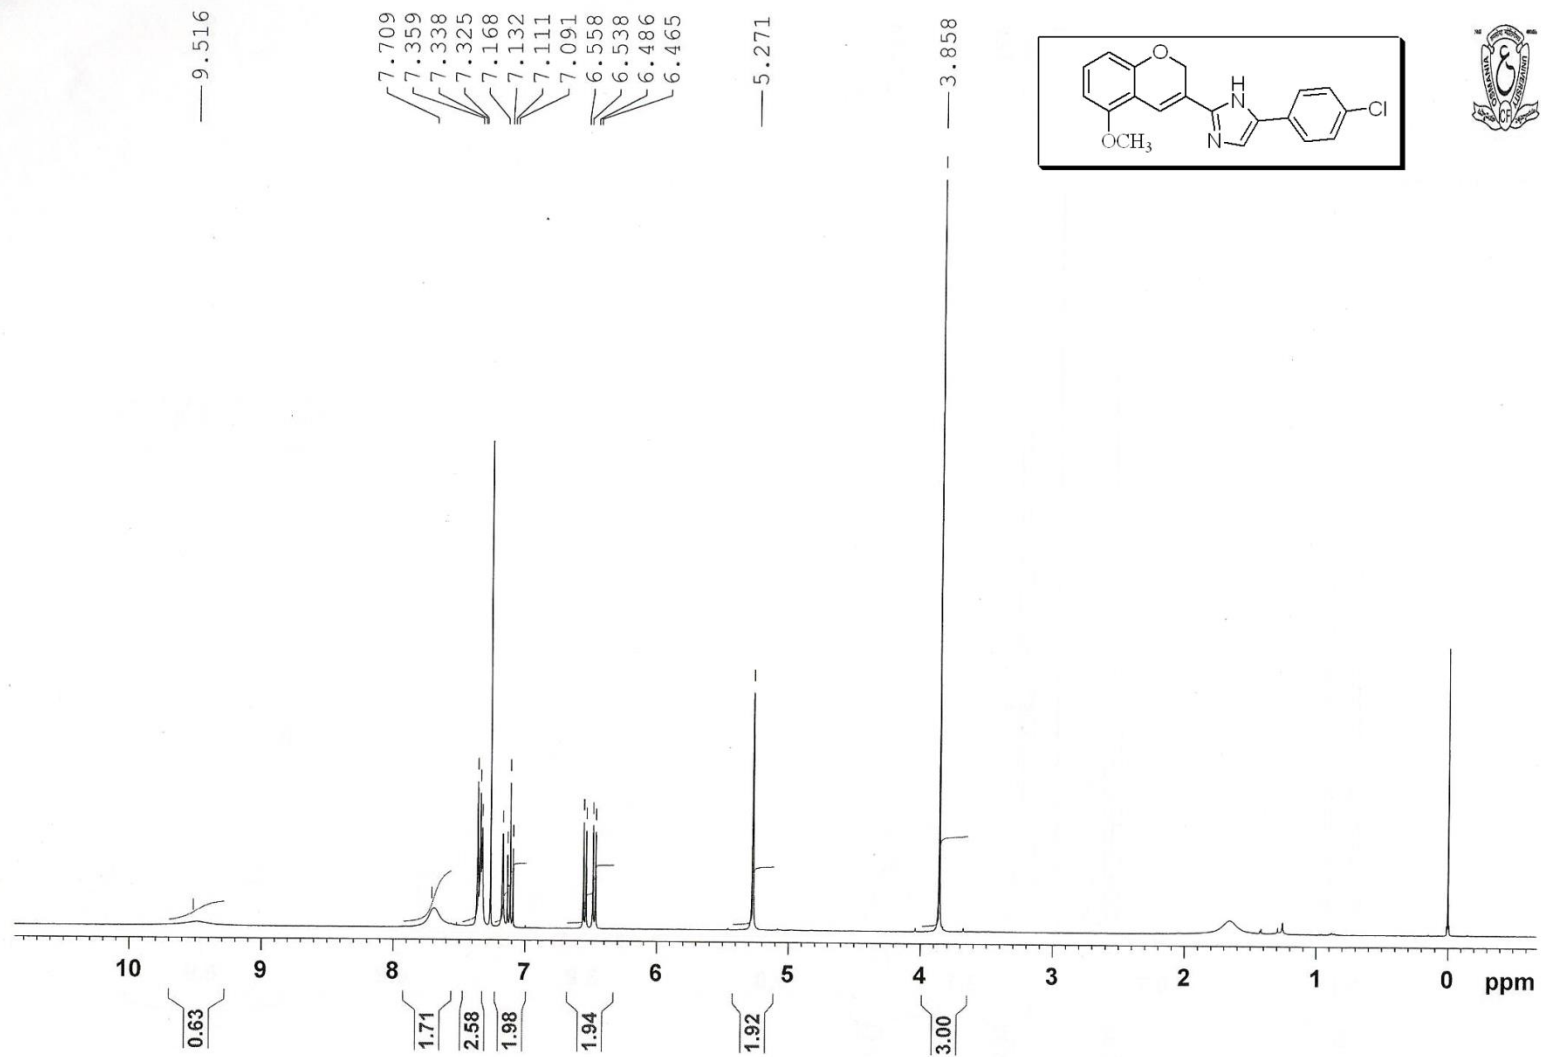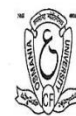

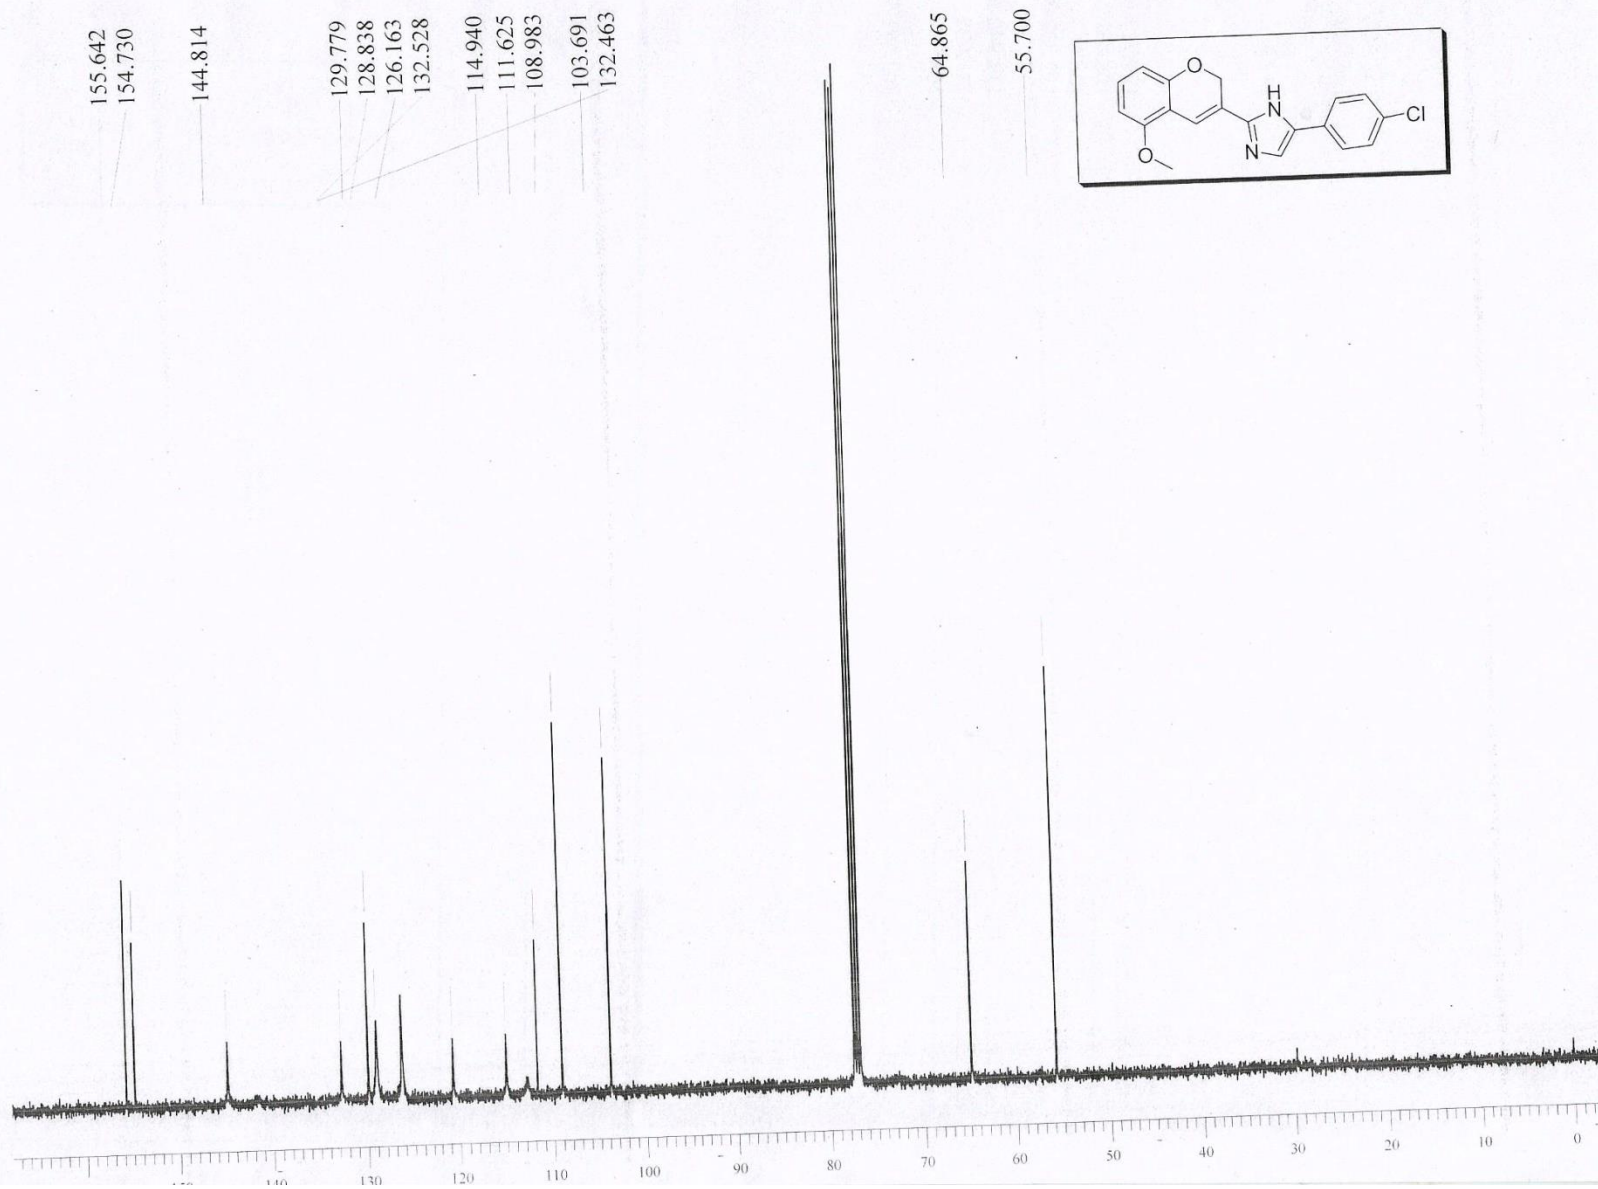

KOR/CDS/056/B

03-Dec-2011 12:31:42

OSPL031211007 10 (0.202) Cm (7:19-(29+36))

2: Scan ES-

6.87e6

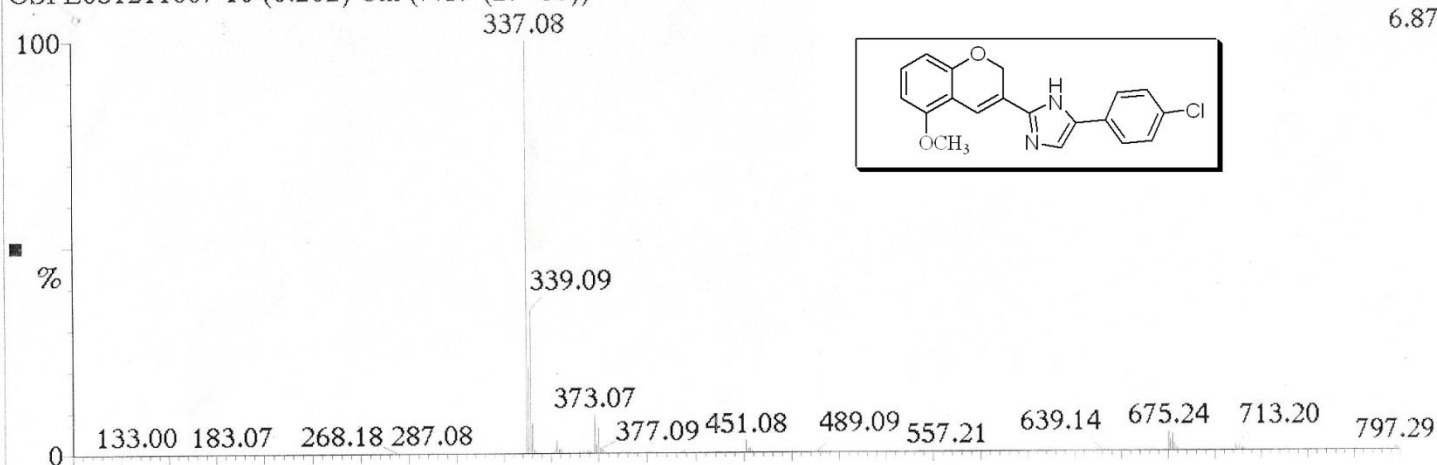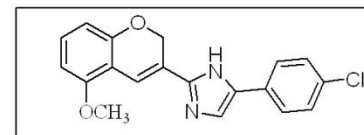

OSPL031211007 16 (0.313) Cm (6:23-(39+44))

1: Scan ES+

4.03e7

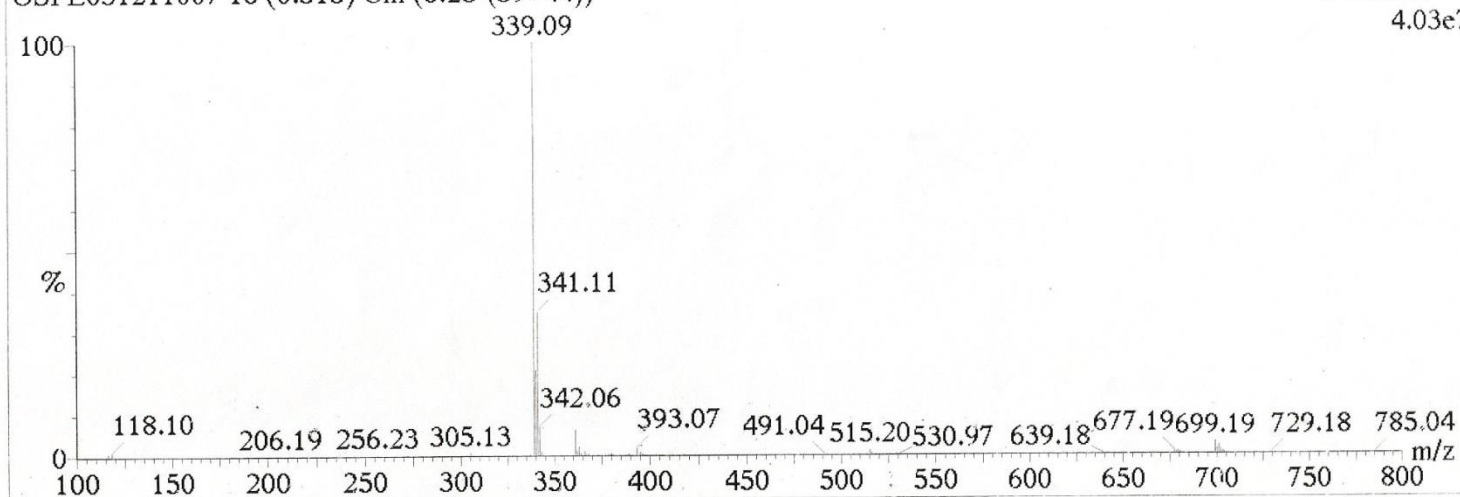

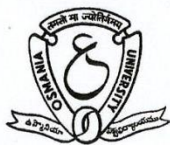

# CENTRAL FACILITIES - OSMANIA UNIVERSITY

## FTIR ANALYSIS REPORT

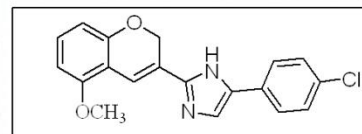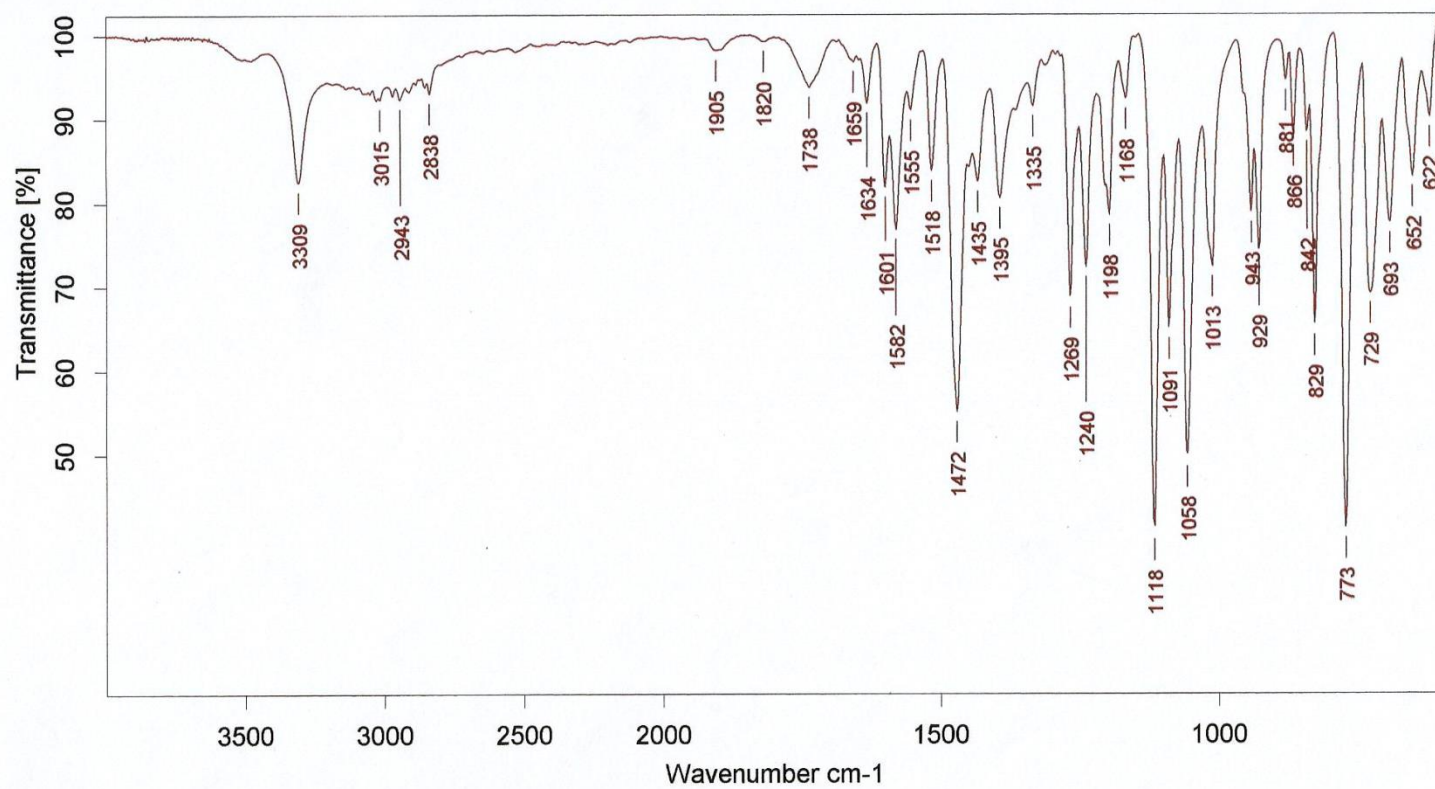

Sample Name: 1302-1052 4 5-OMe-CR 4

Sample Form:ATR

22/02/2013

2:47:30 PM



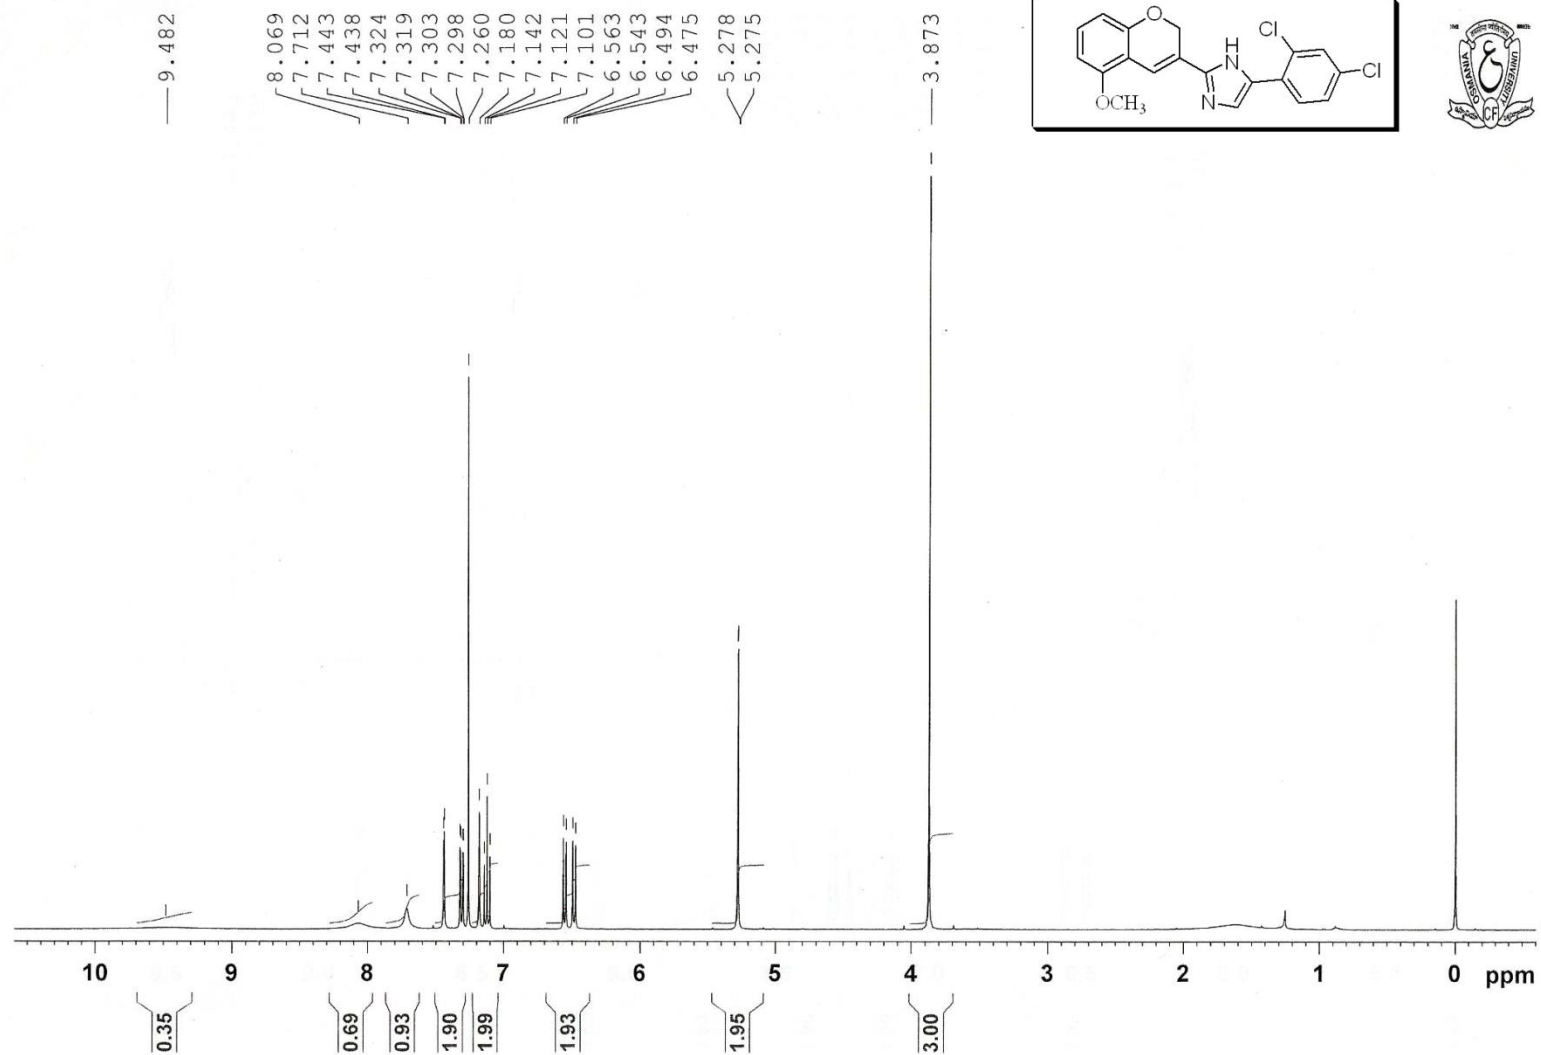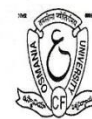

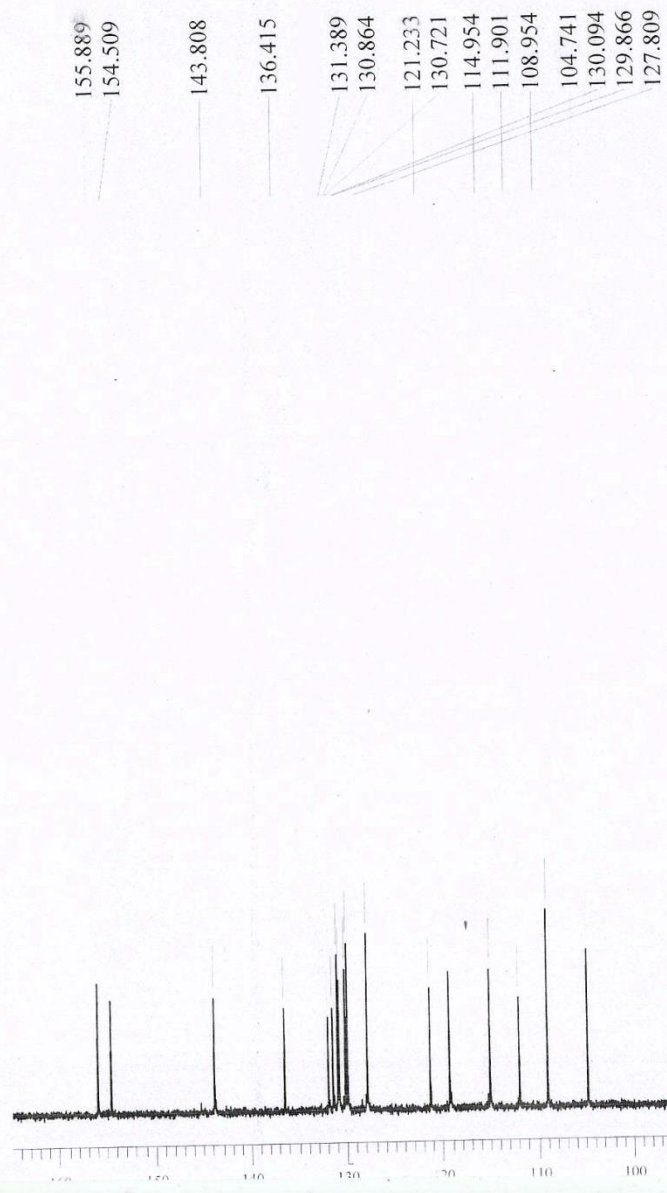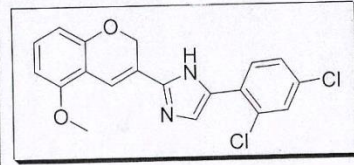

KOR/DP/056/41/D

03-Dec-2011 16:03:40

OSPL031211033 10 (0.202) Cm (6:18-(33+38))

2: Scan ES-  
3.80e6

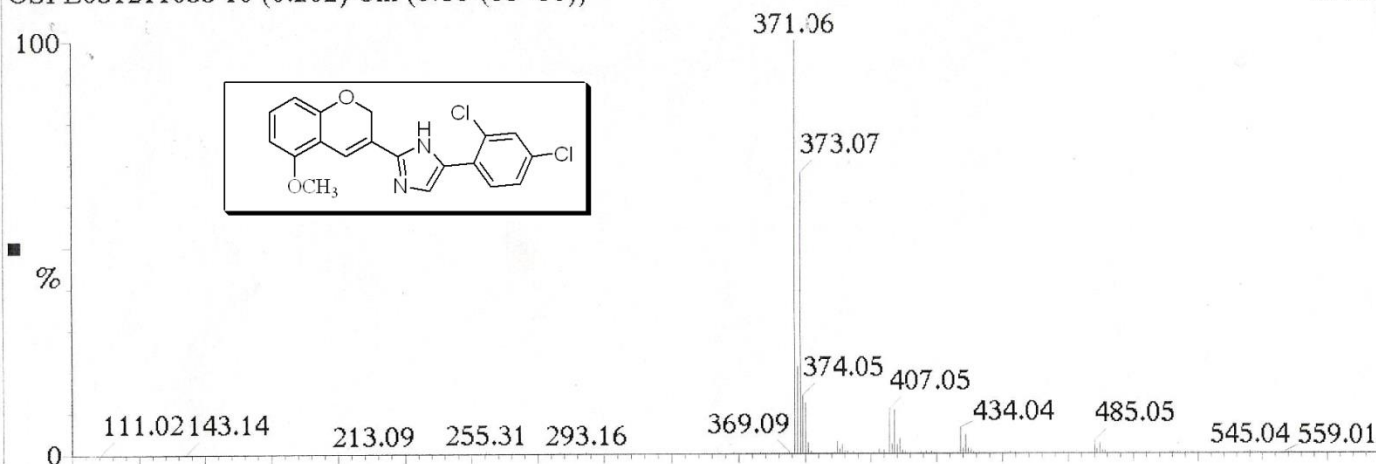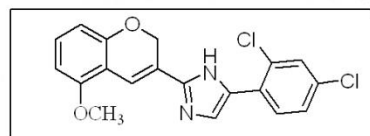

OSPL031211033 14 (0.272) Cm (7:23-(39+44))

1: Scan ES+  
2.41e7

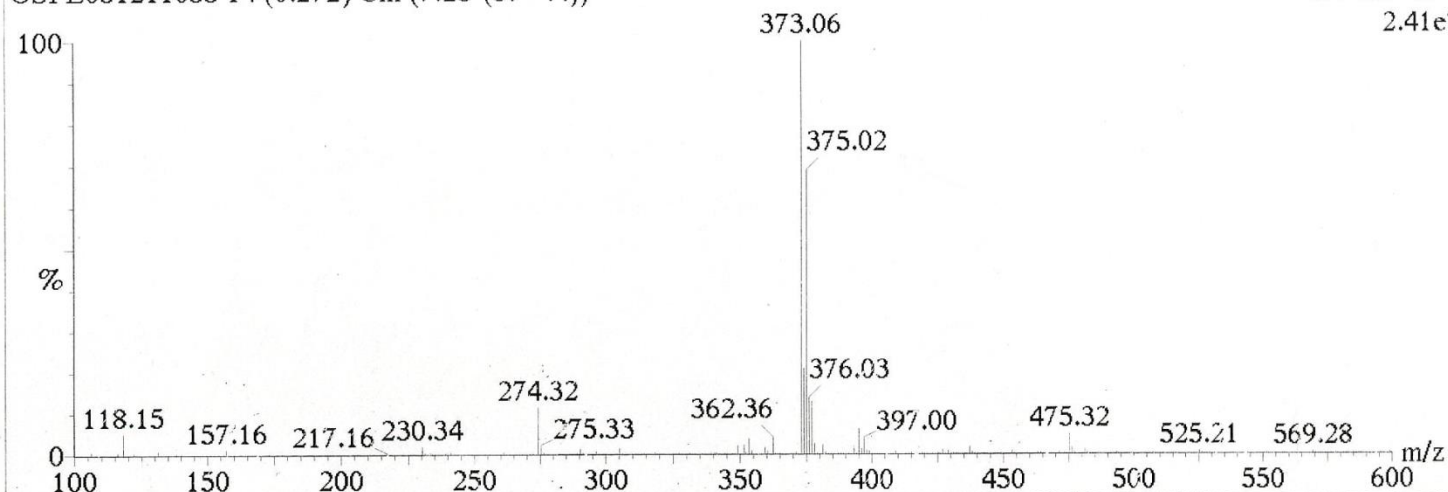

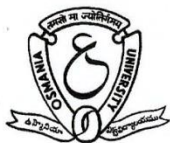

# CENTRAL FACILITIES - OSMANIA UNIVERSITY

## FTIR ANALYSIS REPORT

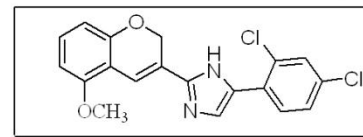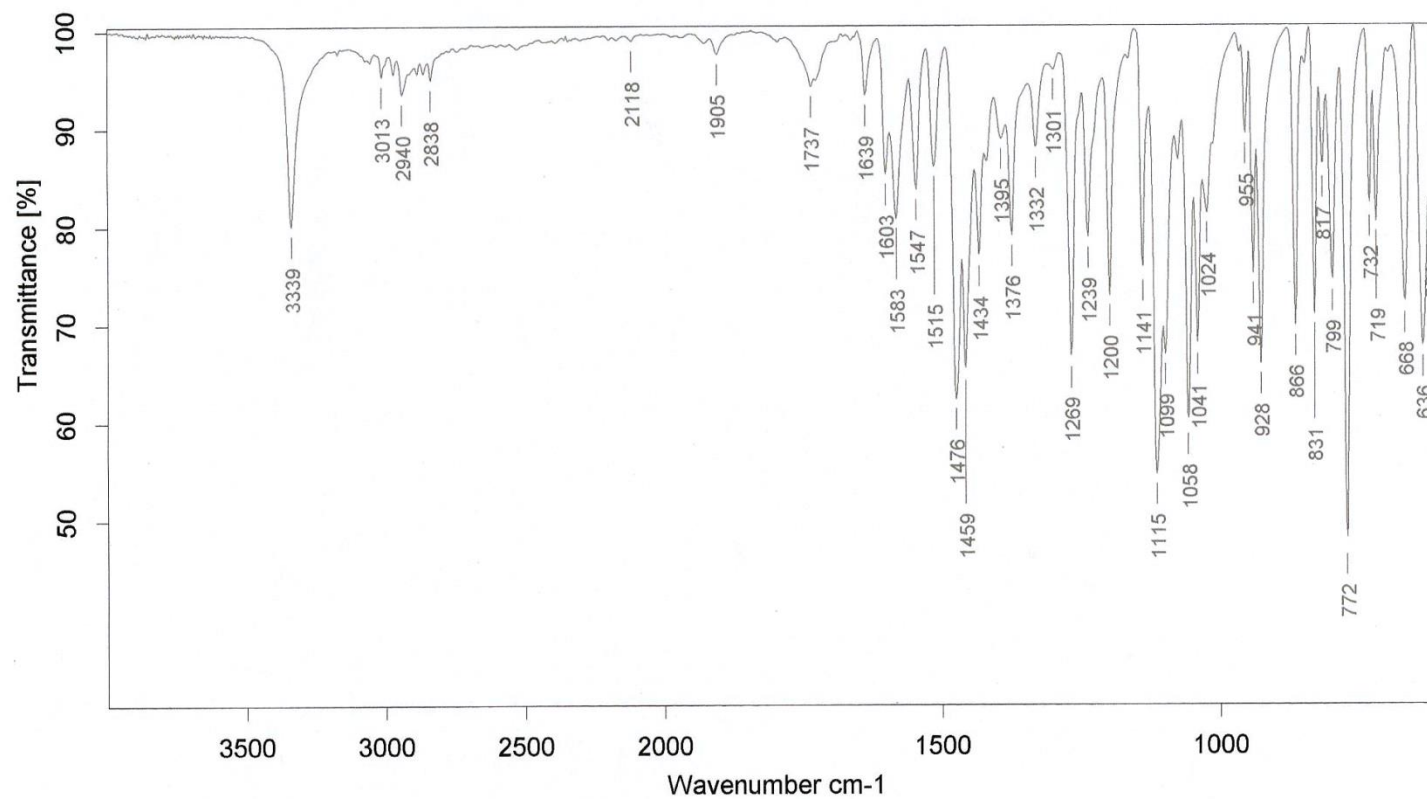

Sample Name: 1302-1052 3 5-OMe-CR 3

Sample Form:ATR

22/02/2013

2:44:35 PM



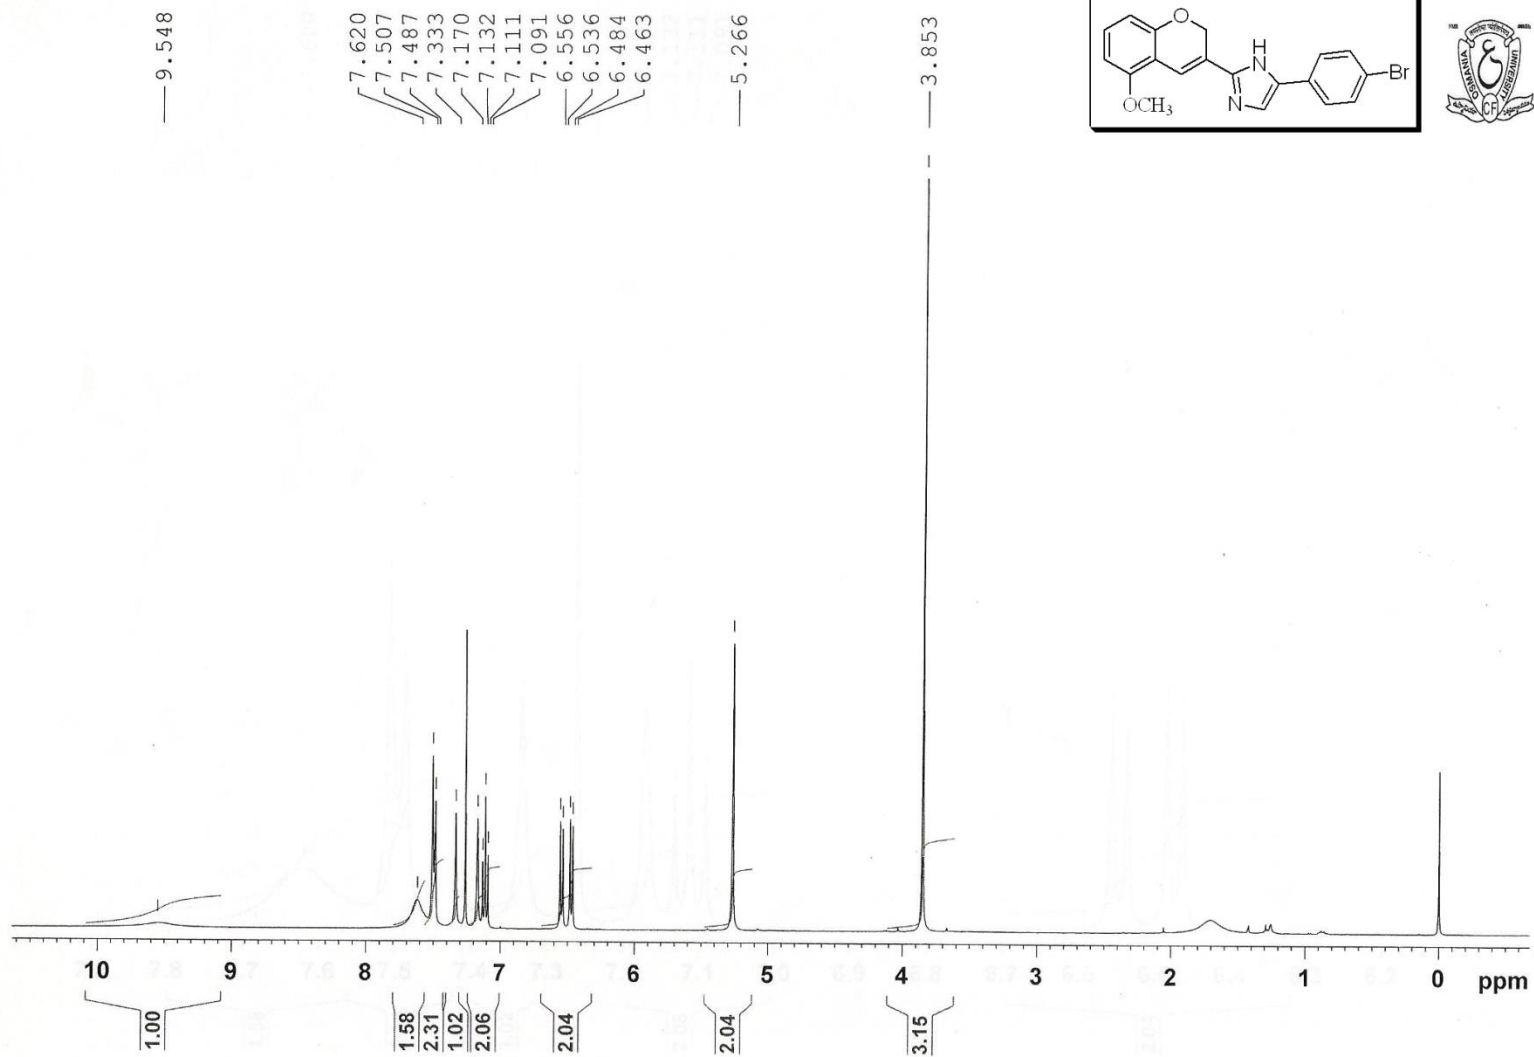

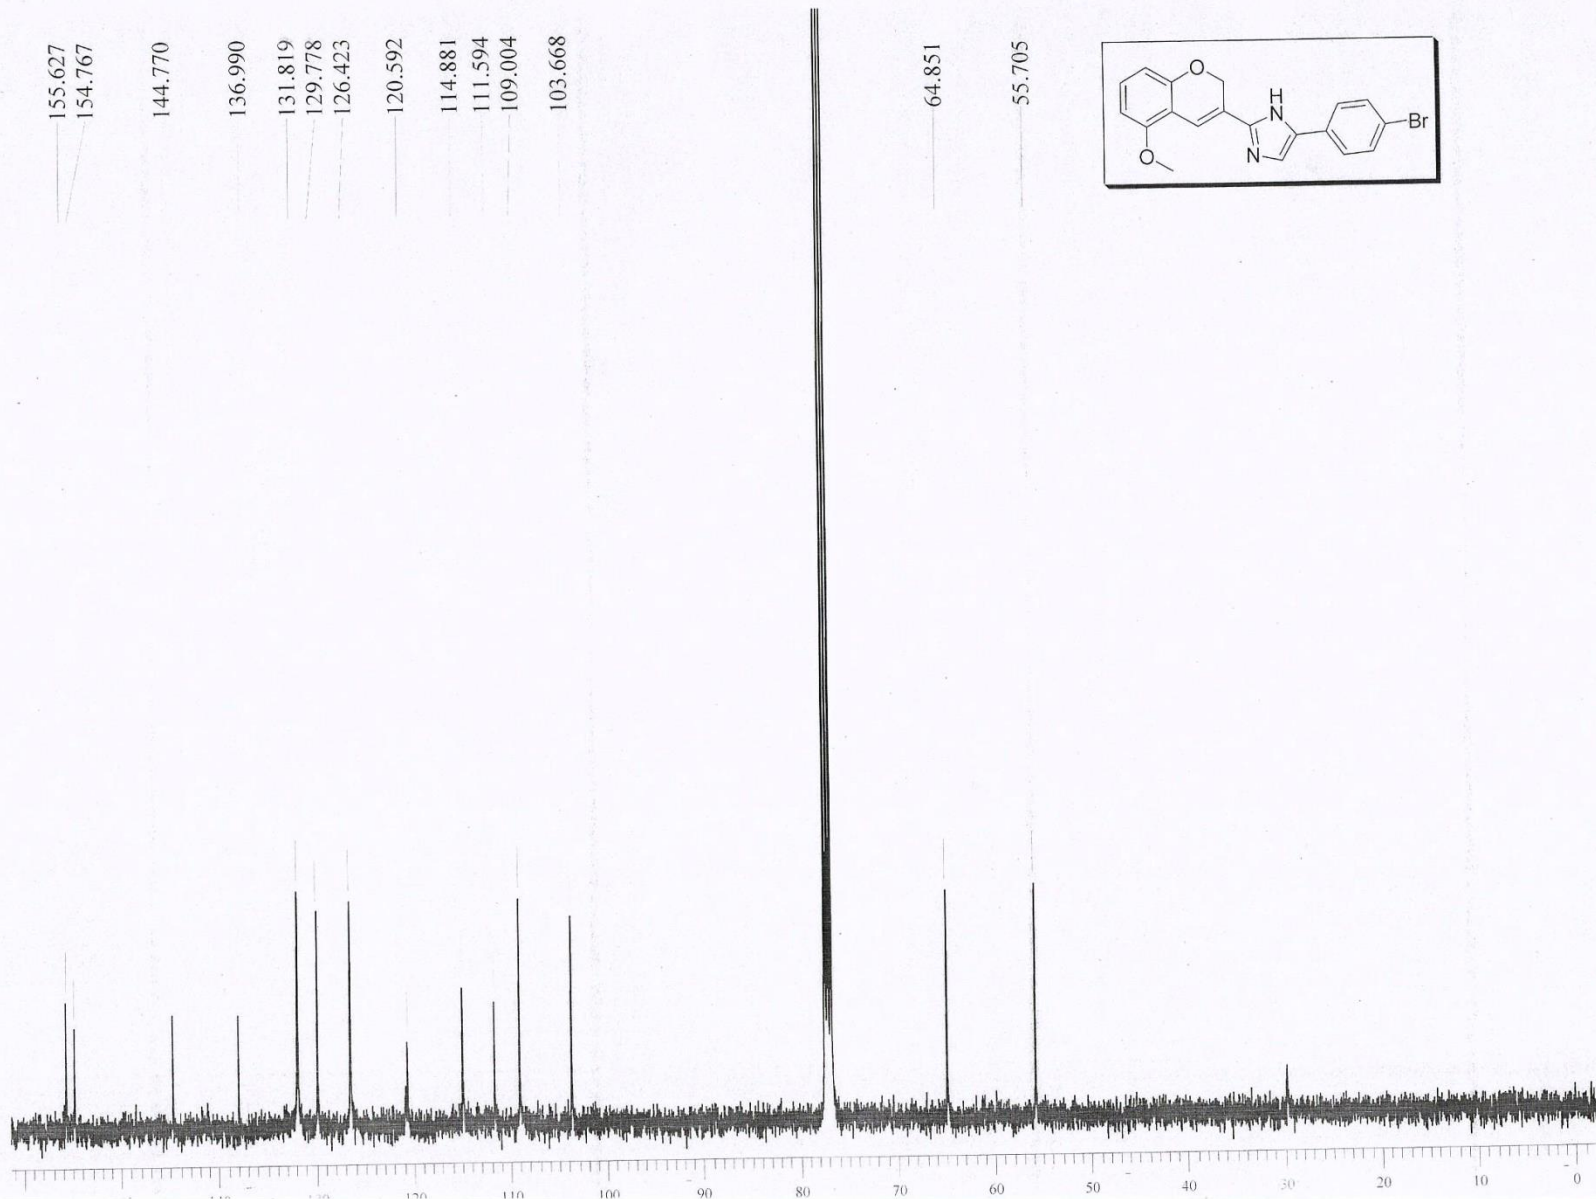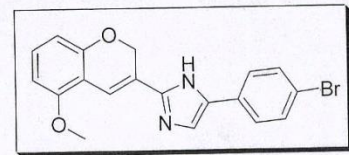

KOR/CDS/056/C

03-Dec-2011 12:33:43

OSPL031211008 10 (0.202) Cm (7:18)

2: Scan ES-  
3.57e6

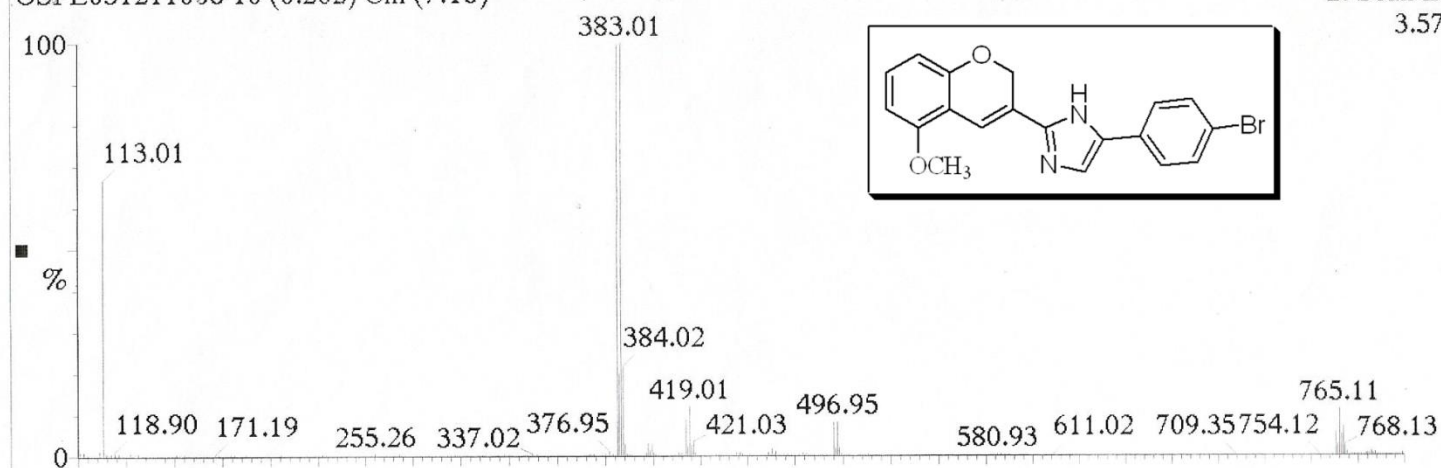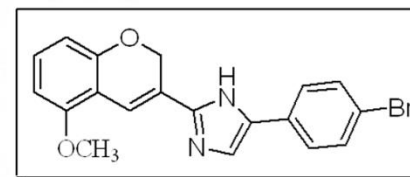

OSPL031211008 16 (0.313) Cm (3:23-(44+46))

1: Scan ES+  
2.04e7

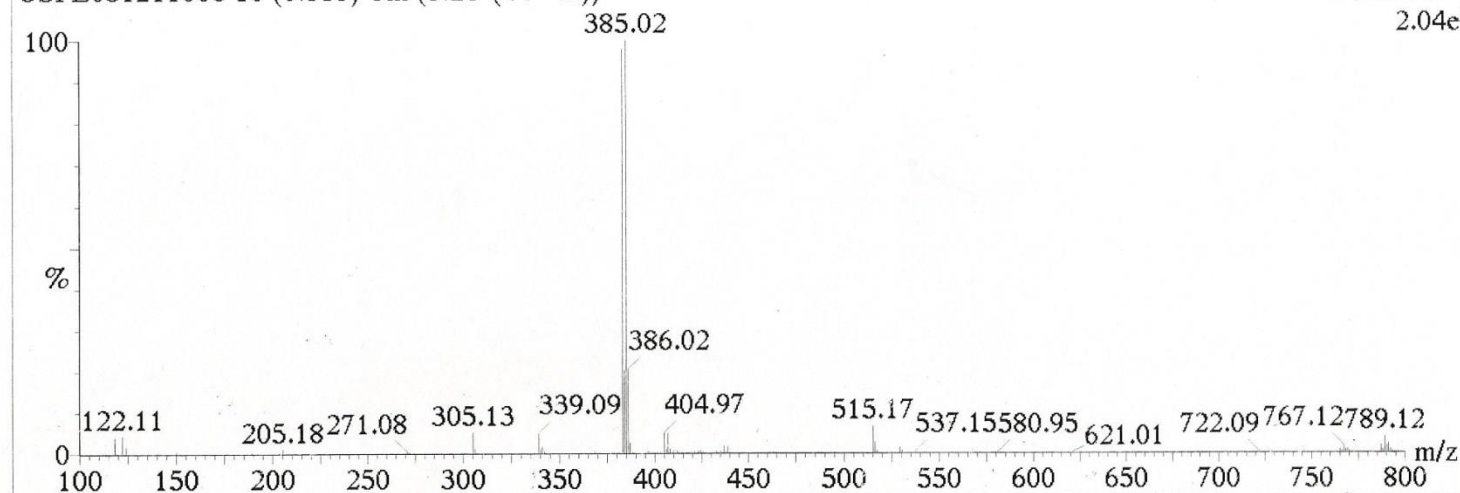

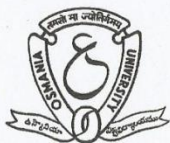

CENTRAL FACILITIES - OSMANIA UNIVERSITY

FTIR ANALYSIS REPORT

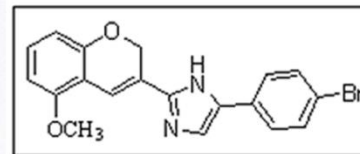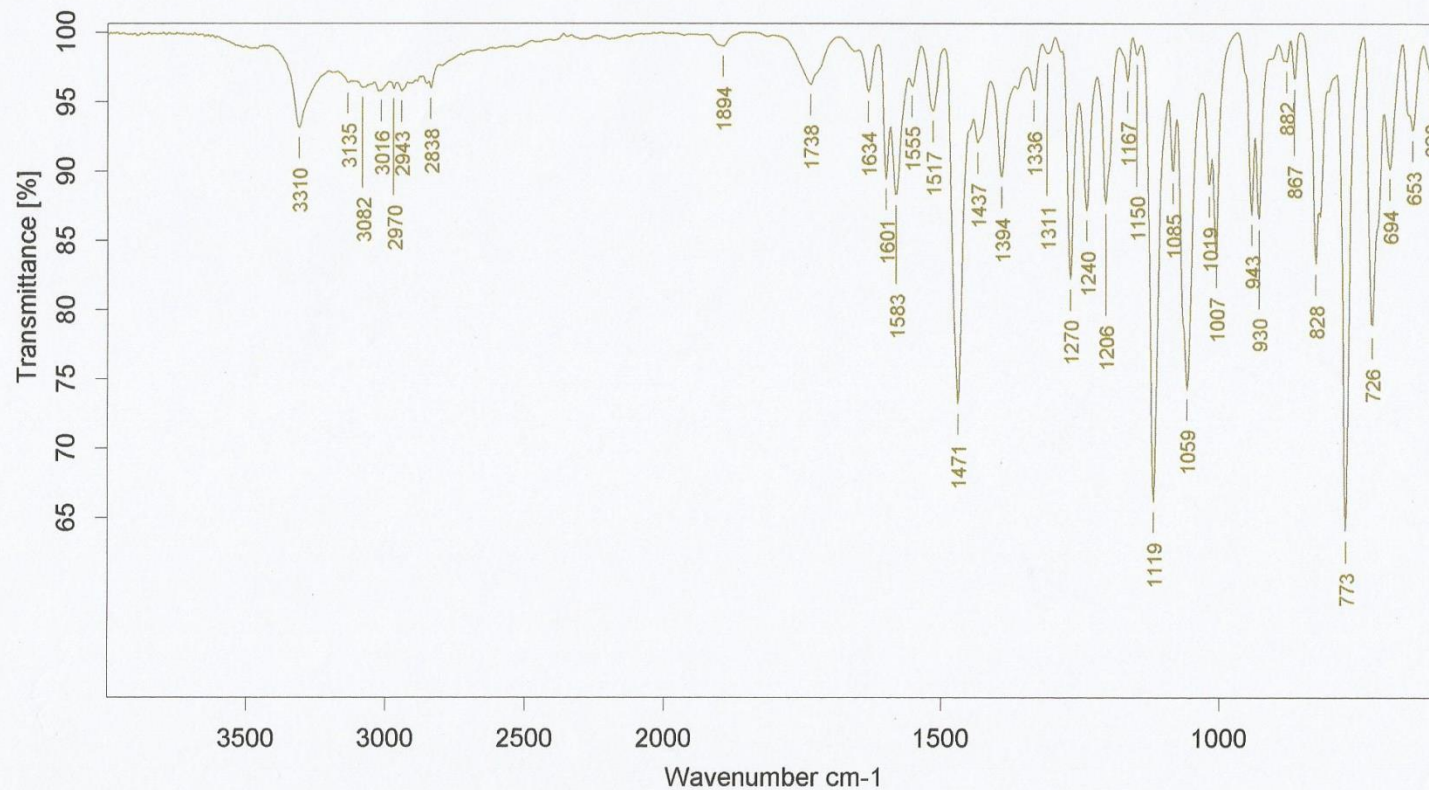

Sample Name: 1302-1052 2 5-OMe-CR 2

Sample Form: ATR

22/02/2013

2:38:22 PM



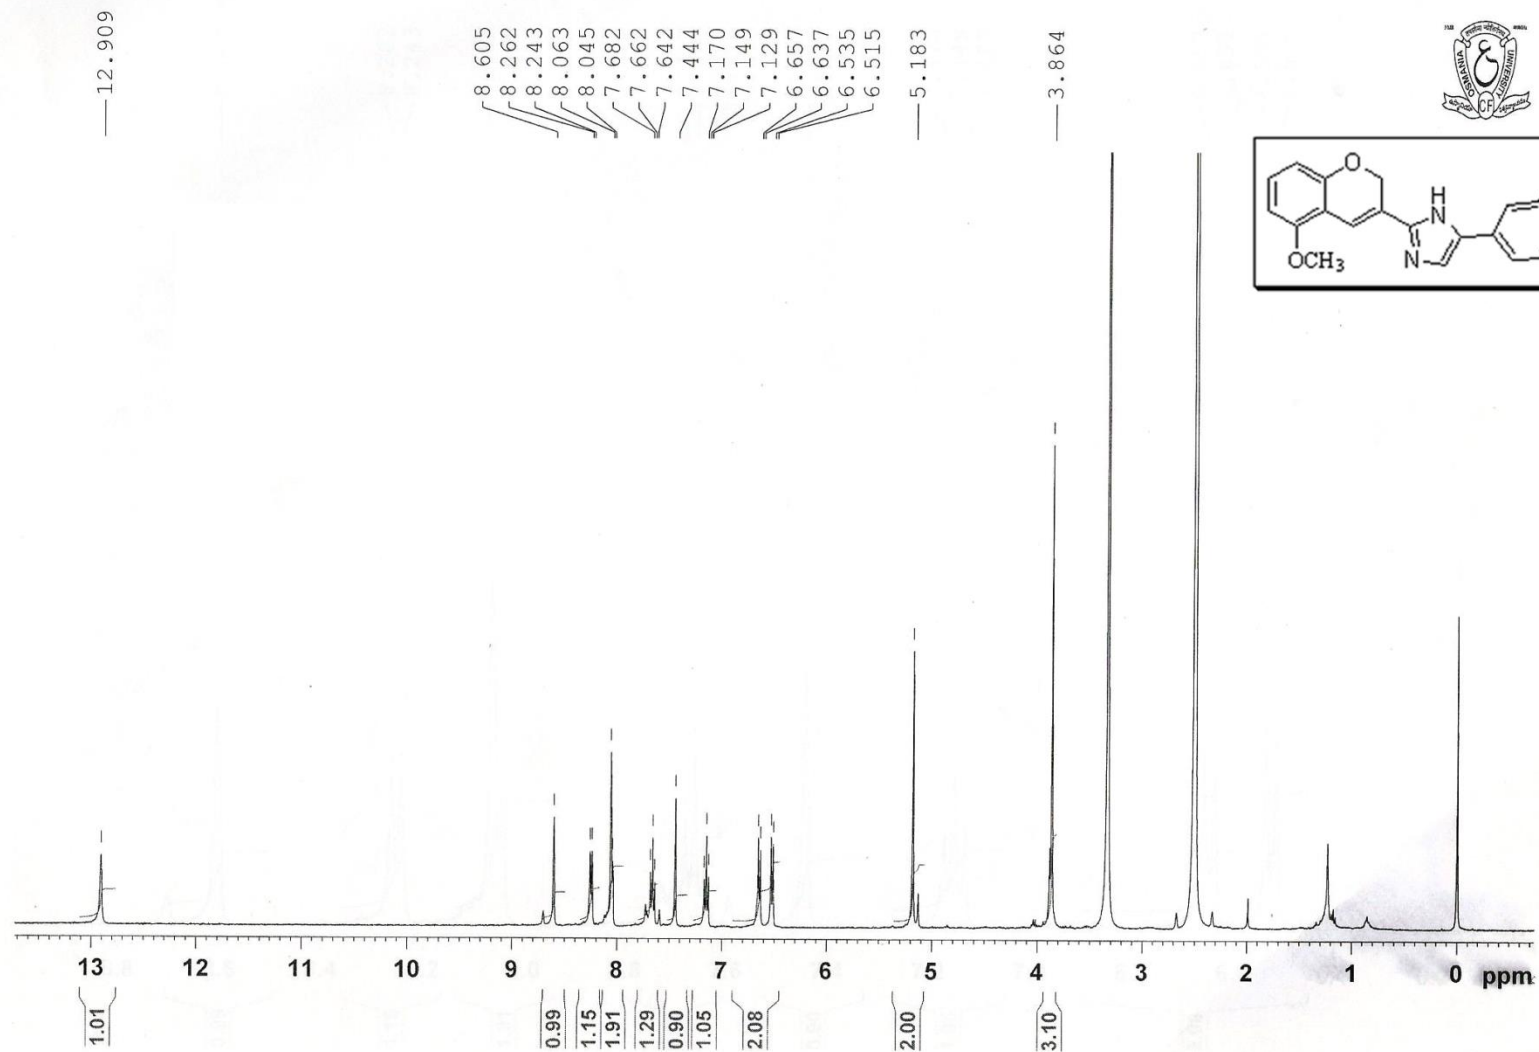

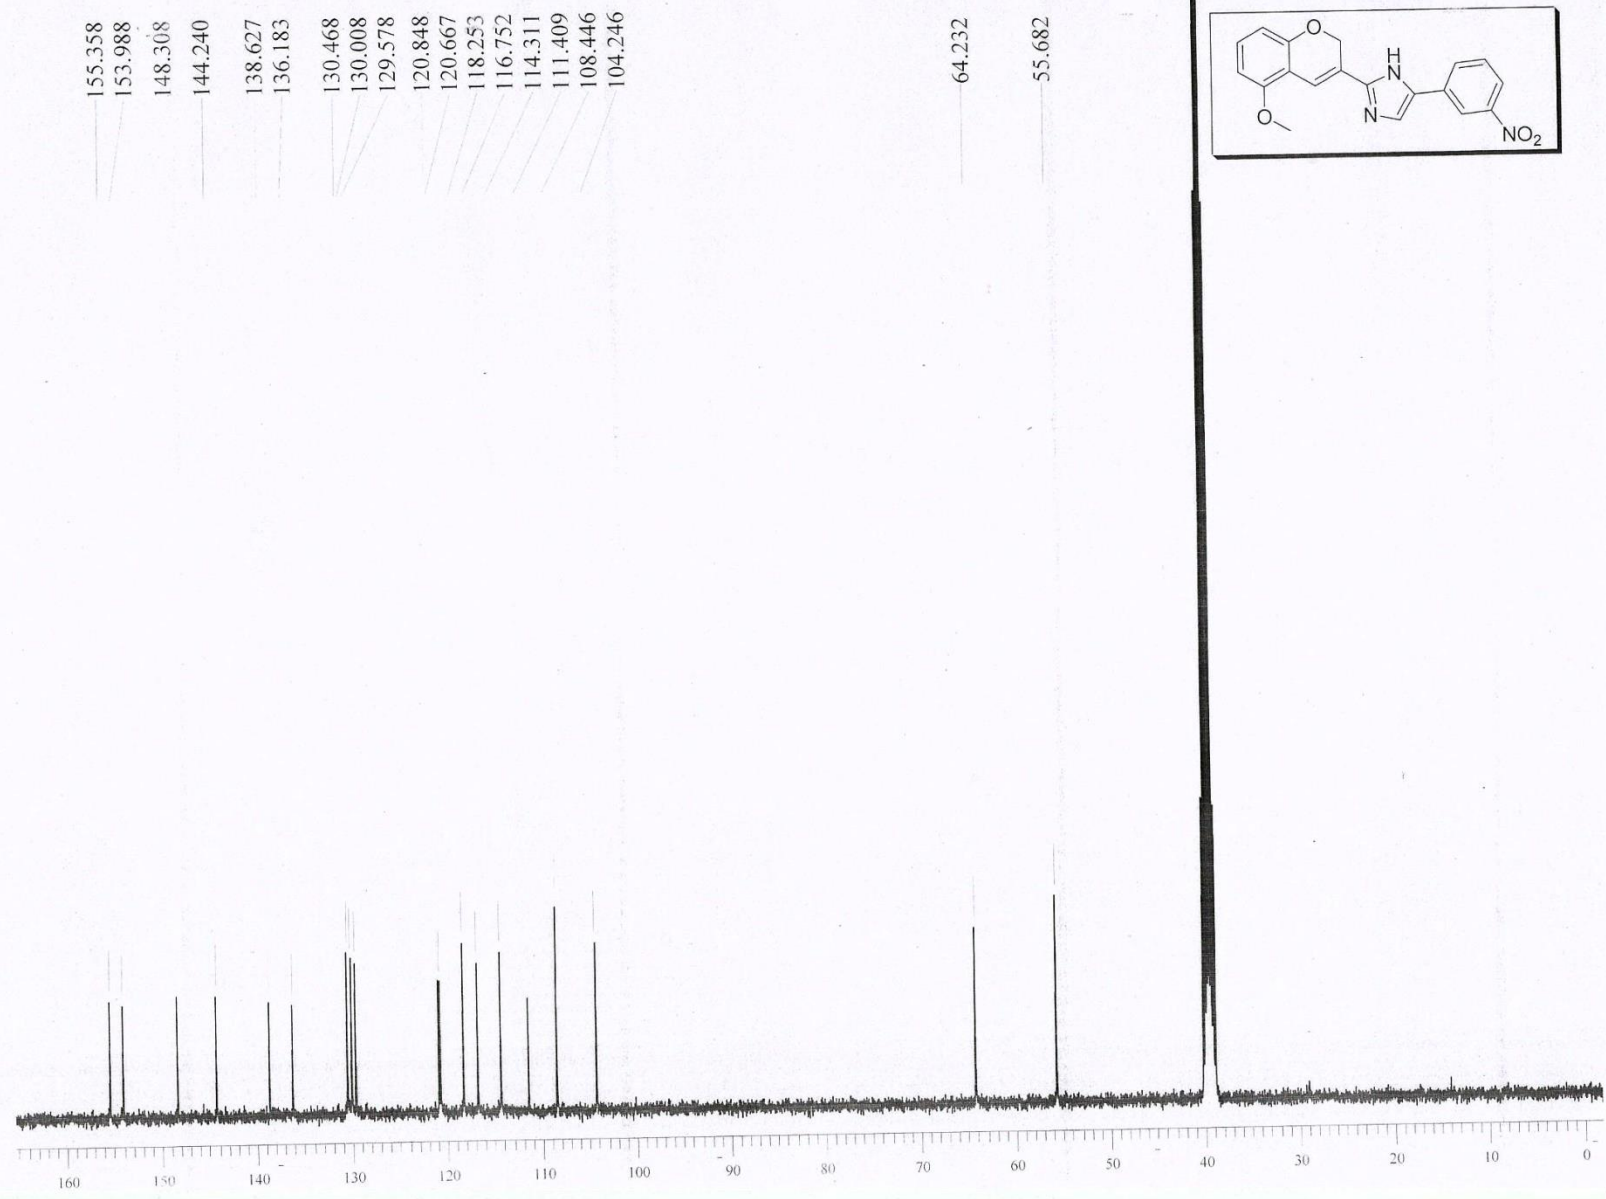

KOR/DP/056/42/E

03-Dec-2011 16:01:39

OSPL031211032 10 (0.202) Cm (7:17-(23+34))

2: Scan ES-  
4.55e6

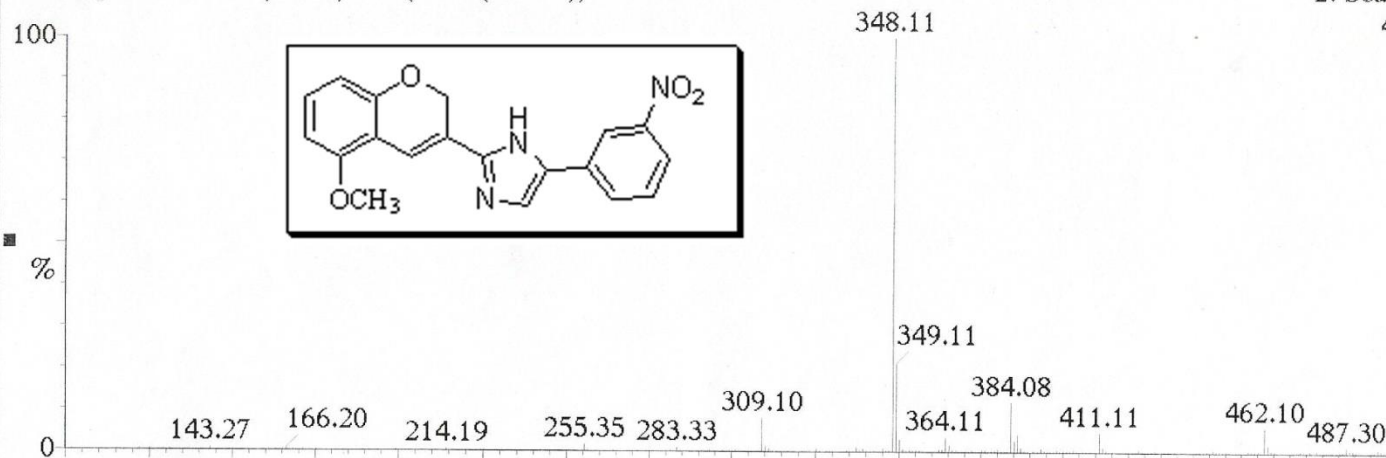

OSPL031211032 10 (0.192) Cm (7:17-(31+39))

1: Scan ES+  
1.67e7

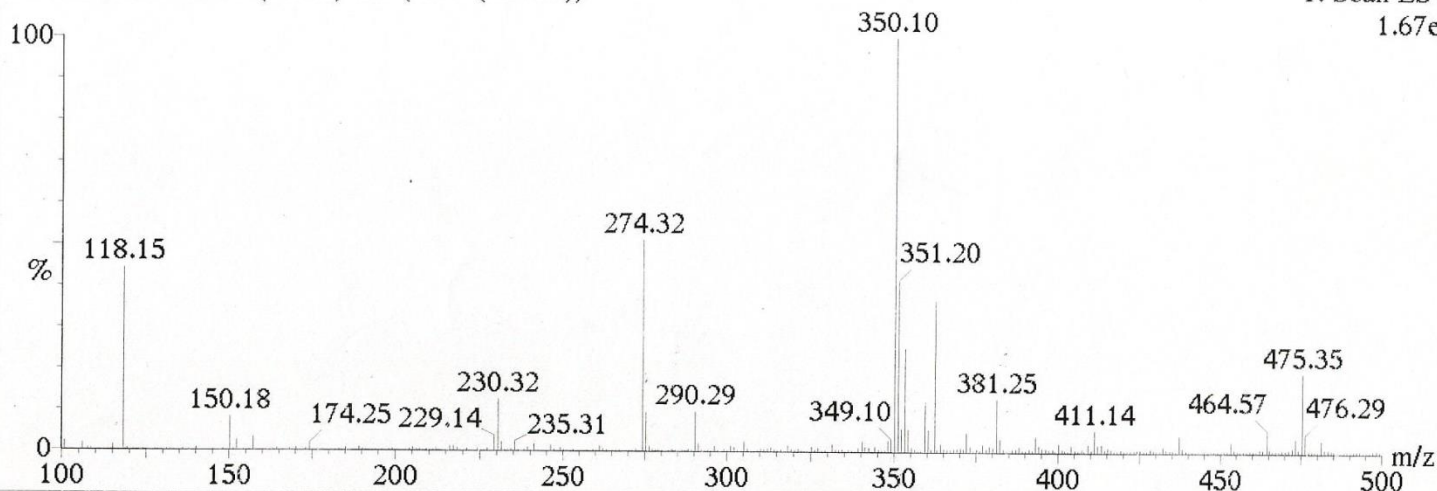

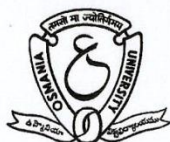

# CENTRAL FACILITIES - OSMANIA UNIVERSITY

## FTIR ANALYSIS REPORT

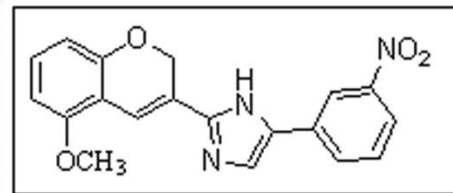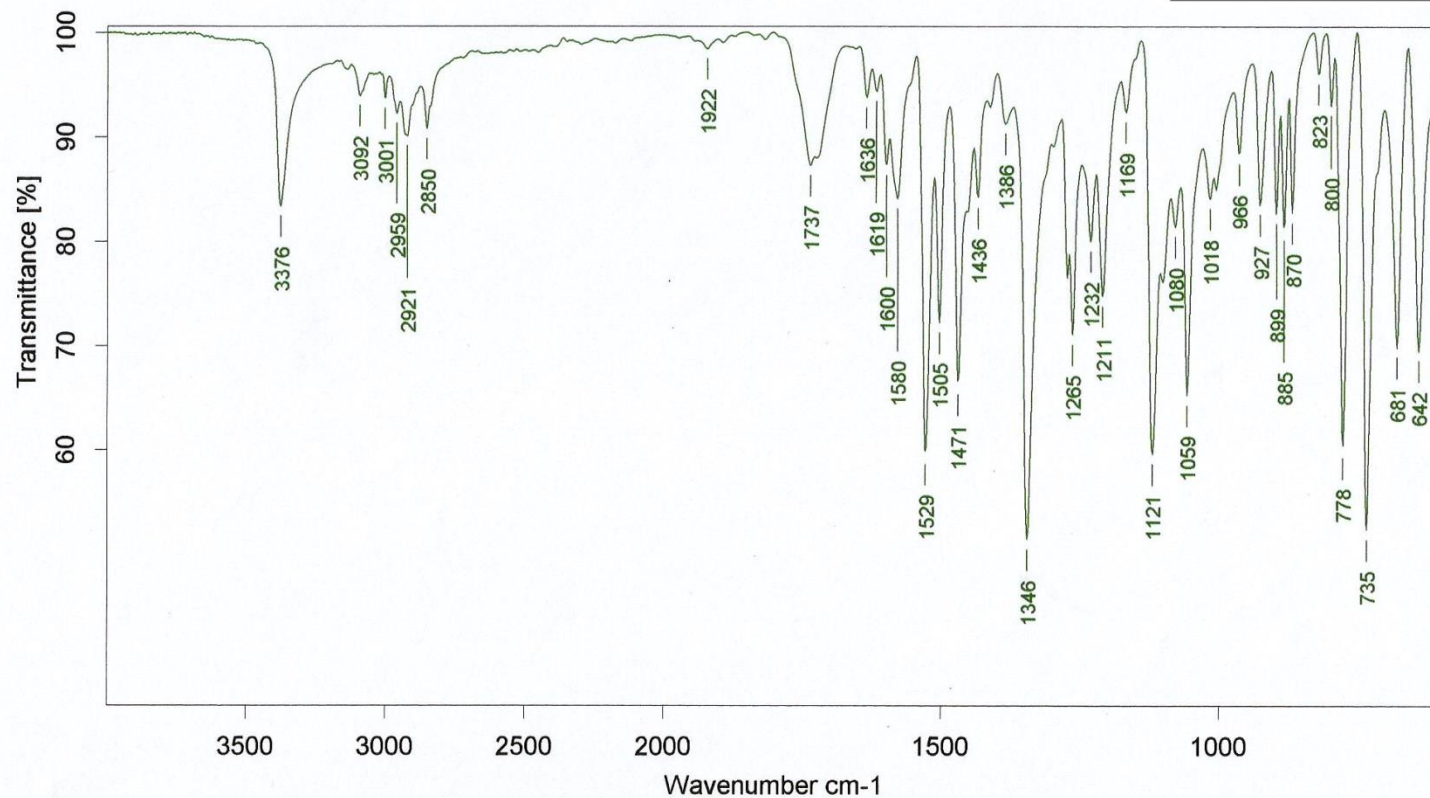

Sample Name: 1302-1052 6 5-OMe-CR 6

Sample Form: ATR

22/02/2013

2:52:56 PM



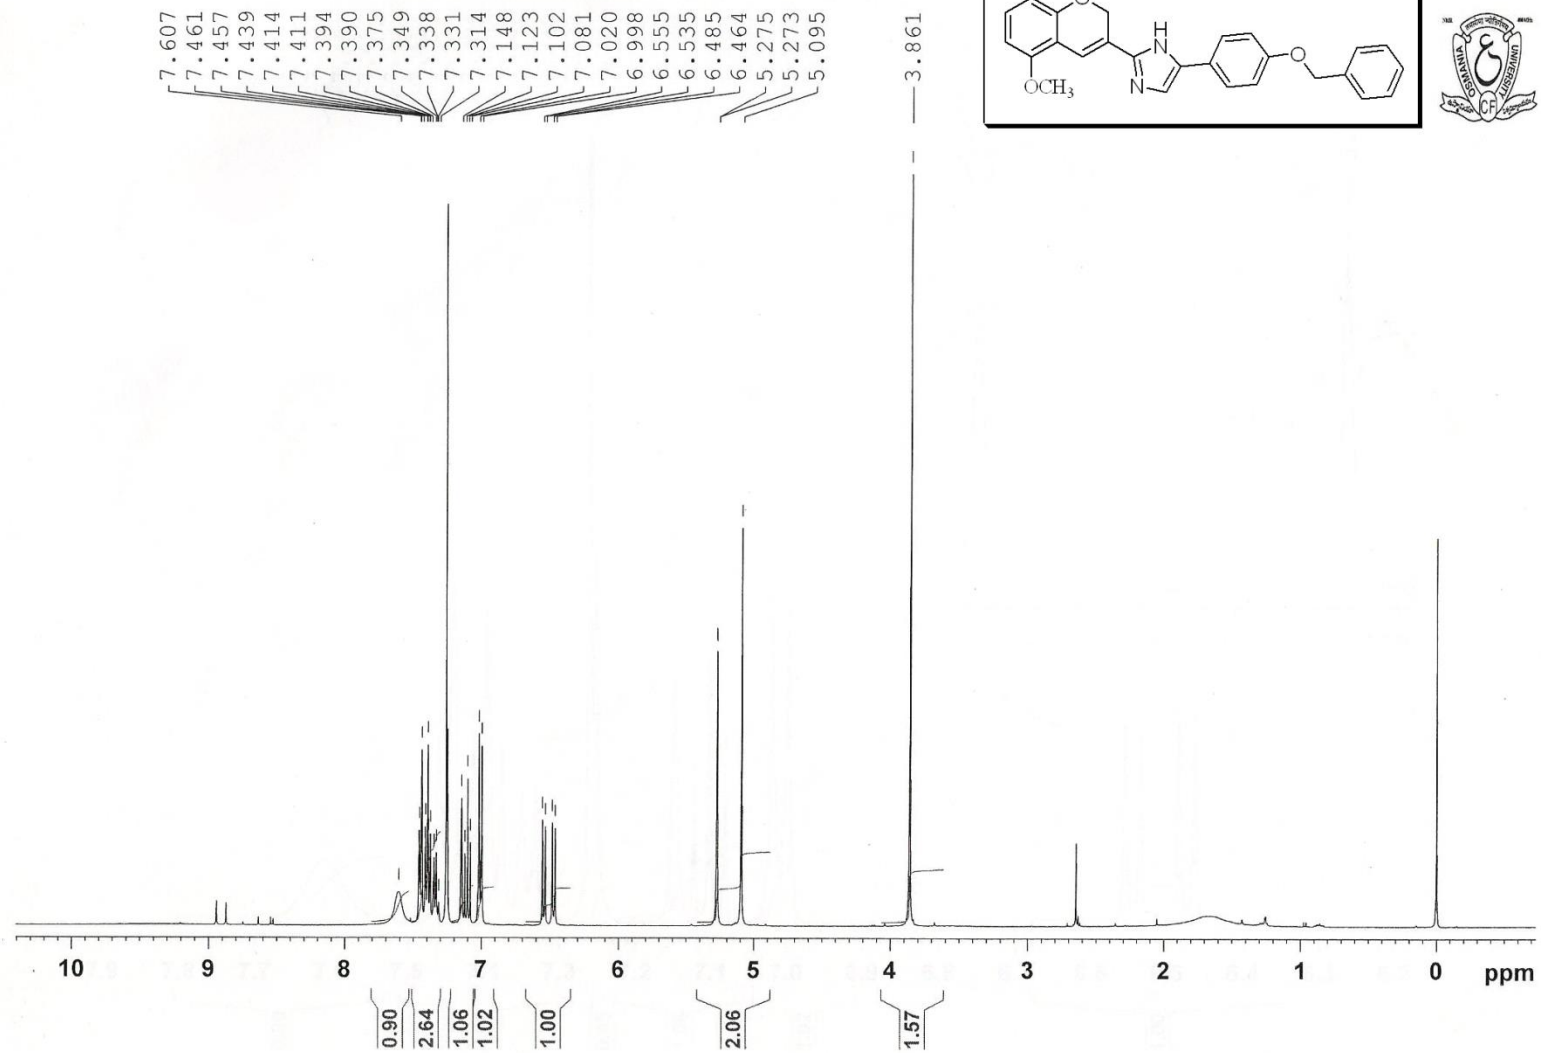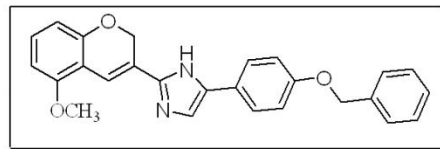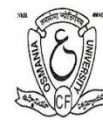

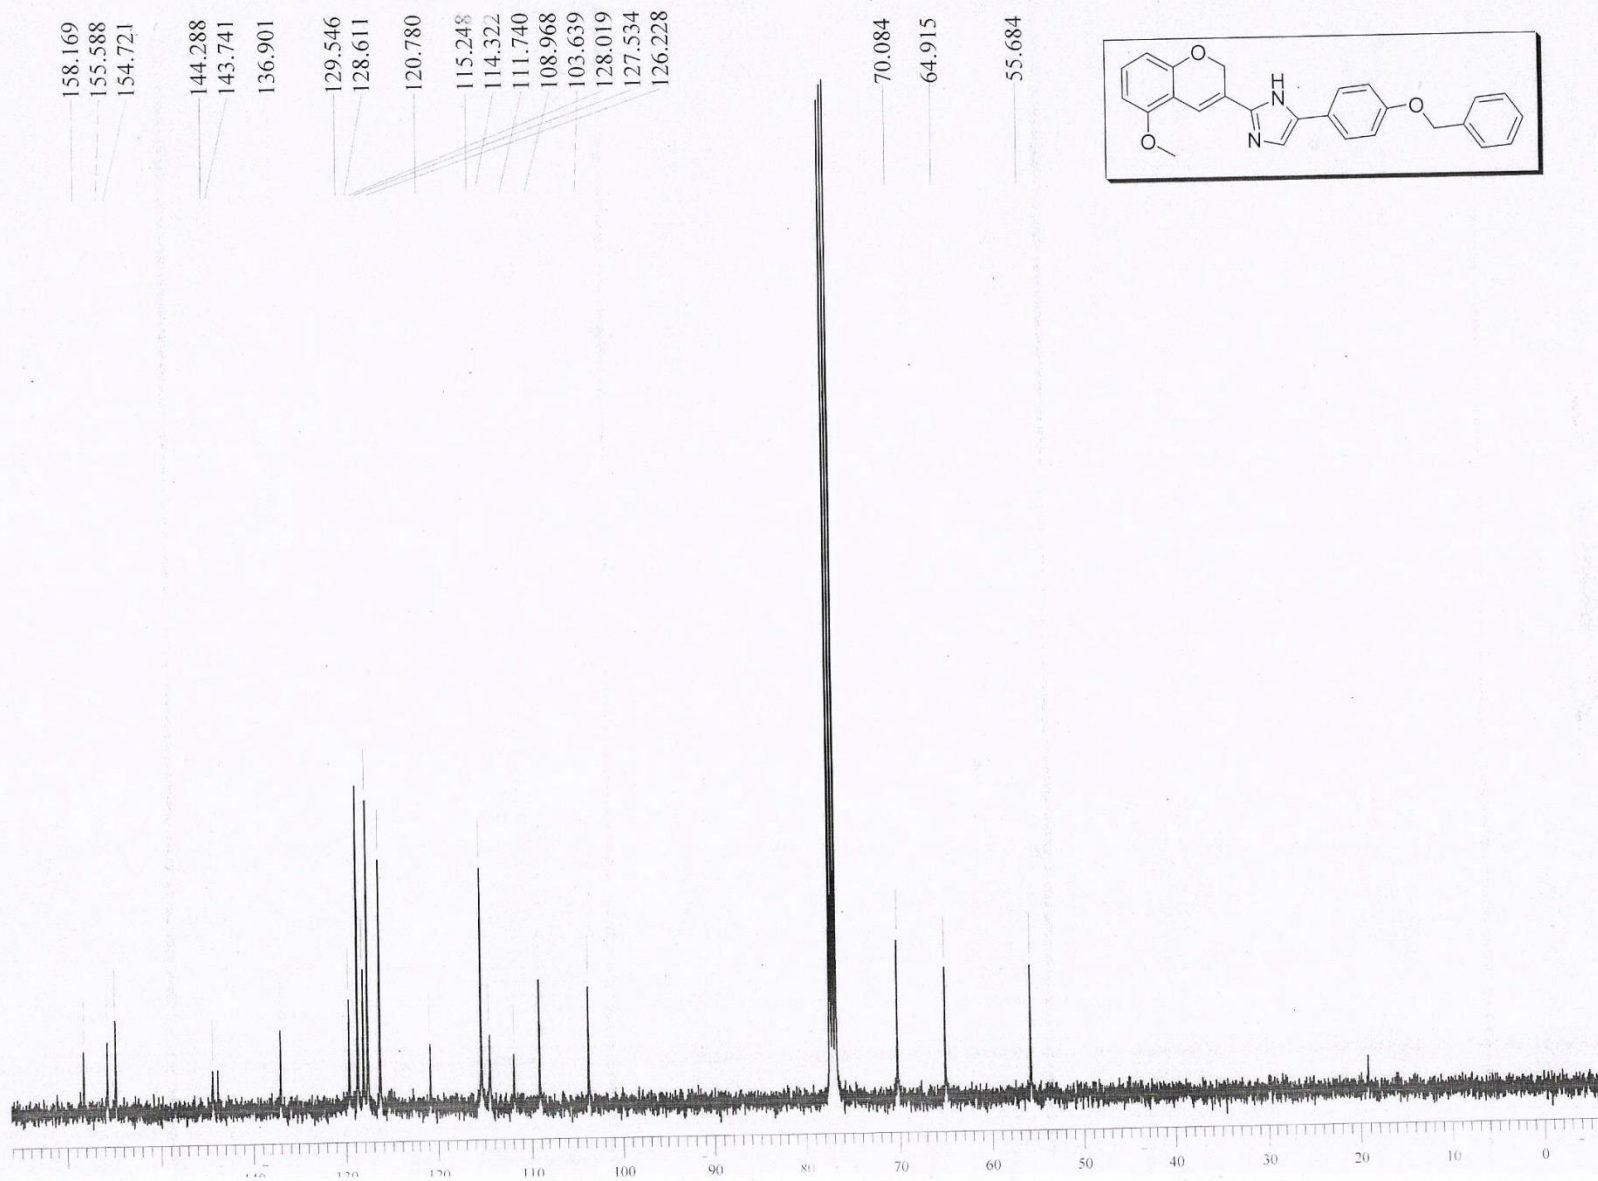

KOR/DP/056/93/F

03-Dec-2011 15:59:37

OSPL031211031 11 (0.222) Cm (6:17-(25+33))

2: Scan ES-

1.51e6

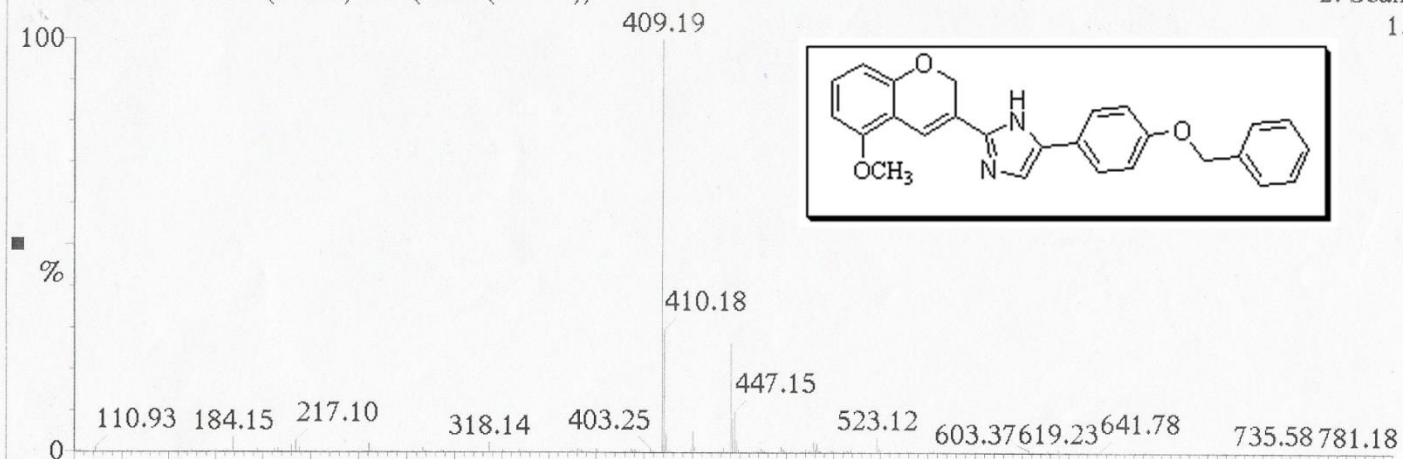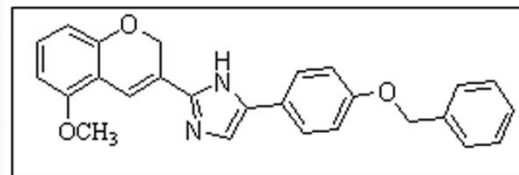

OSPL031211031 18 (0.353) Cm (7:19-(37+44))

1: Scan ES+

2.60e7

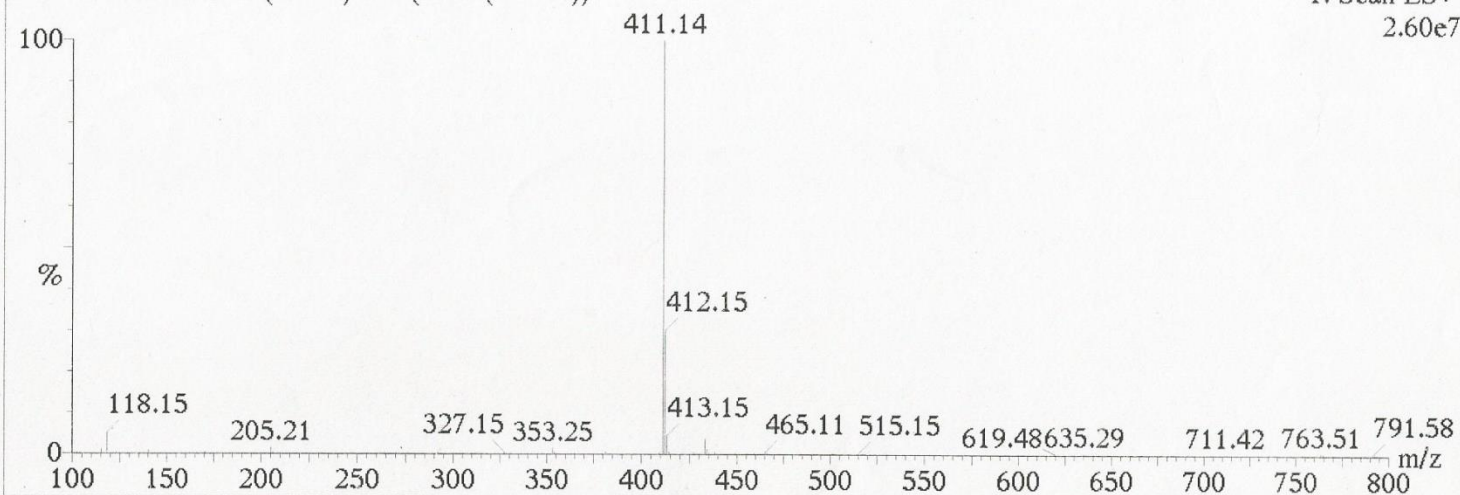

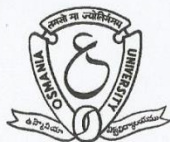

# CENTRAL FACILITIES - OSMANIA UNIVERSITY

## FTIR ANALYSIS REPORT

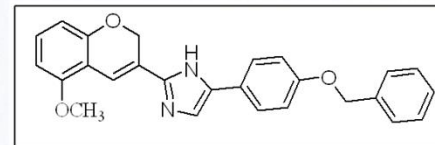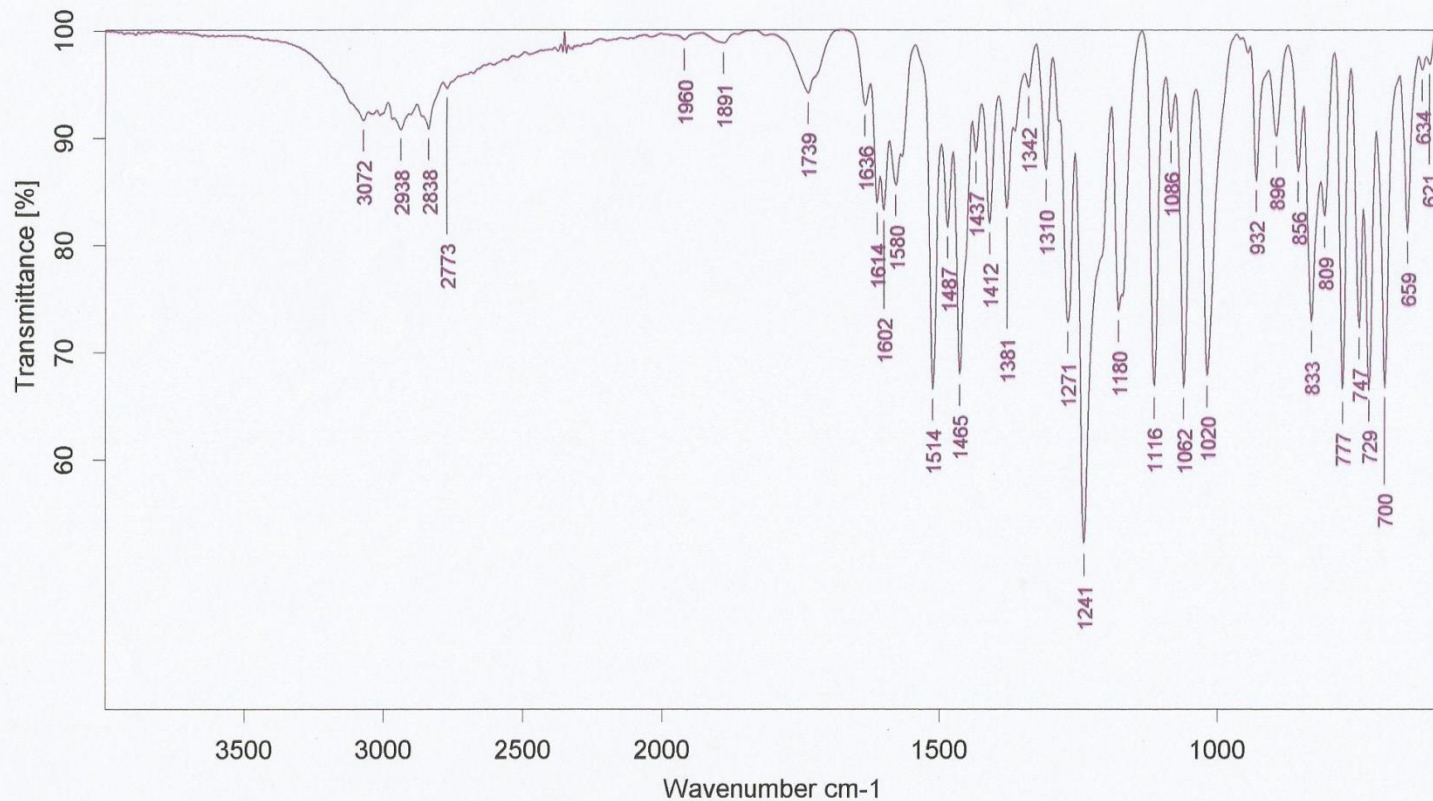

Sample Name: 1302-1052 5 5-OMe-CR 5

Sample Form:ATR

22/02/2013

2:49:55 PM
